# Supplementary material
Source: MDPI journal article supplement (https://www.mdpi.com/2073-4344/13/4/757)
Supplement: s1 [file s1]

## SUPPORTING INFORMATION

### C-H versus C-O Addition: A DFT Study of the Catalytic Cleavage of the $\beta$ -O-4 Ether Linkage in Lignin by Iridium and Cobalt Pincer Complexes

Mary Mensah <sup>1</sup>, Richard Tia <sup>1</sup>, Evans Adei <sup>1,\*</sup> and Nora H. de Leeuw <sup>2,3,\*</sup>

**1** Department of Chemistry, Kwame Nkrumah University of Science and Technology, Kumasi 1916, Ghana; [ajuablak@yahoo.com](mailto:ajuablak@yahoo.com) (M.M.); [richtiagh@yahoo.com](mailto:richtiagh@yahoo.com) (R.T.)

**2** School of Chemistry, Cardiff University, Main Building, Park Place, Cardiff CF10 3AT, UK

**3** School of Chemistry, University of Leeds, Leeds LS2 9JT, UK

\* Correspondence: [eadei@yahoo.com](mailto:eadei@yahoo.com) (E.A.); [n.h.deleeuw@leeds.ac.uk](mailto:n.h.deleeuw@leeds.ac.uk) (N.H.d.L.)

#### Contents

1. Table S1: Comparison between the M06 and M06-2X-D3 levels of theories calculated relative energies, activation energies and energies of formation for the IrPCP catalyzed cleavage of 2-Phenoxy-*I*-phenylethanol along Pathway A.
2. Table S2: Comparison between the M06 and M06-2X-D3 levels of theories calculated relative energies, activation energies and energies of formation for the IrPCP catalyzed cleavage of 2-Phenoxy-*I*-phenylethanol along Pathway B.
3. Table S3: Comparison between the M06 and M06-2X-D3 levels of theories calculated relative energies, activation energies and energies of formation for the IrPCP catalyzed cleavage of 2-Phenoxy-*I*-phenylethanol along Pathway C.
4. S4 XYZ coordinates of the optimized structures

**Table S1:** Comparison between the M06 and M06-2X-D3 levels of theories calculated relative energies, activation energies and energies of formation for the IrPCP catalyzed cleavage of 2-Phenoxy-*I*-phenylethanol (Pathway A).

|      | M06-2x-d3<br>RE | M06-2x-d3<br>Ea/Ef | M06 RE | M06 Ea/Ef | Diff in RE | Diff in<br>Ea/Ef |
|------|-----------------|--------------------|--------|-----------|------------|------------------|
| TS1  | 12.51           | 12.5               | 11.35  | 11.35     | 1.15       | 1.15             |
| INT1 | -6.67           | -6.7               | -1.38  | -1.38     | 5.28       | 5.32             |
| TS2  | 0.97            | 7.64               | 9.77   | 11.15     | 8.79       | 3.52             |
| INT3 | -30.10          | -23.43             | -26.48 | -23.98    | 3.62       | 0.55             |
| TS4  | 0.88            | 30.98              | -1.53  | 24.95     | 2.41       | 6.04             |

**Table S2:** Comparison between the M06 and M06-2X-D3 levels of theories calculated relative energies, activation energies and energies of formation for the IrPCP catalyzed cleavage of 2-Phenoxy-*I*-phenylethanol along Pathway B.

|      | M06-2x-d3<br>RE | M06-2x-d3<br>Ea/Ef | M06 RE | M06 Ea/Ef | Diff in RE | Diff in<br>Ea/Ef |
|------|-----------------|--------------------|--------|-----------|------------|------------------|
| INT1 | -9.94           | -9.9               | -6.86  | -6.9      | 3.07       | 3                |
| TS1  | 29.95           | 39.89              | 27.22  | 34.08     | 2.73       | 5.81             |
| INT2 | -22.35          | -12.41             | -17.45 | -10.59    | 4.90       | 1.82             |
| TS2  | 4.41            | 26.76              | 5.14   | 22.58     | 0.73       | 4.18             |
| INT3 | -30.86          | -8.51              | -26.60 | -9.15     | 4.26       | 0.64             |
| INT4 | -30.10          | 0.76               | -25.64 | 0.96      | 4.46       | 0.20             |
| TS4  | 0.88            | 31.74              | 1.24   | 26.88     | 0.35       | 4.87             |

**Table S3:** Comparison between the M06 and M06-2X-D3 levels of theories calculated relative energies, activation energies and energies of formation for the IrPCP catalyzed cleavage of 2-Phenoxy-*I*-phenylethanol along Pathway C.

|      | M06-2x-d3<br>RE | M06-2x-d3<br>Ea/Ef | M06 RE | M06 Ea/Ef | Diff in RE | Diff in<br>Ea/Ef |
|------|-----------------|--------------------|--------|-----------|------------|------------------|
| INT1 | -4.03           | -4                 | -4.78  | -4.8      | 0.75       | 0.8              |
| TS1  | 27.29           | 31.32              | 21.98  | 26.76     | 5.31       | 4.57             |
| INT2 | -30.43          | -26.40             | -26.24 | -21.47    | 4.18       | 4.93             |
| INT3 | -27.86          | 2.57               | -29.42 | -3.18     | 1.57       | 5.75             |
| TS3  | -11.92          | 15.94              | -10.28 | 19.15     | 1.64       | 3.21             |
| INT4 | -16.51          | 11.35              | -16.12 | 13.31     | 0.39       | 1.96             |
| TS4  | -6.14           | 10.37              | -11.58 | 4.53      | 5.45       | 5.84             |

**Cartesian coordinates (in Å) and Energies (in hartree) of the optimized structures.**

**Reaction between (PCP)Ir and 1 along pathway A**

**Reactants**

**Substrate (2-phenoxy-1-phenylethanol) 1**

EE = -692.021667

EE + ZPE = -691.775624

G° = -691.818104

|   |          |          |          |
|---|----------|----------|----------|
| H | -0.85501 | -1.15090 | 1.85746  |
| C | -0.11655 | -0.43987 | 1.47046  |
| H | 0.32056  | 0.08737  | 2.32809  |
| C | 0.96159  | -1.19641 | 0.72063  |
| H | 1.34452  | -1.95751 | 1.41770  |
| C | 2.13422  | -0.36120 | 0.25336  |
| C | 4.37413  | 1.04170  | -0.65514 |
| C | 2.25408  | 1.00508  | 0.48552  |
| C | 3.14853  | -1.01330 | -0.44856 |
| C | 4.25963  | -0.32139 | -0.89858 |
| C | 3.36916  | 1.70063  | 0.03413  |
| H | 1.46480  | 1.54418  | 0.99868  |
| H | 3.04766  | -2.07742 | -0.64504 |
| H | 5.04150  | -0.84580 | -1.43955 |
| H | 3.44639  | 2.76772  | 0.21932  |
| H | 5.24404  | 1.58801  | -1.00652 |
| O | -0.74416 | 0.53292  | 0.65171  |
| C | -2.02439 | 0.34165  | 0.22277  |
| C | -4.64347 | 0.15837  | -0.70472 |
| C | -2.59260 | -0.90827 | -0.00480 |
| C | -2.76231 | 1.49643  | -0.02336 |
| C | -4.06138 | 1.40182  | -0.48978 |
| C | -3.90251 | -0.98693 | -0.46155 |
| H | -2.00579 | -1.80970 | 0.13498  |
| H | -2.29165 | 2.45679  | 0.16076  |
| H | -4.62826 | 2.30852  | -0.67826 |
| H | -4.33989 | -1.96483 | -0.63940 |
| H | -5.66425 | 0.08523  | -1.06503 |
| O | 0.40689  | -1.93727 | -0.35170 |
| H | 0.18481  | -1.30665 | -1.04550 |

**Iridium pincer catalyst**

EE = -1570.196996

EE + ZPE = -1569.695015

G° = -1569.753818

|    |          |          |          |
|----|----------|----------|----------|
| Ir | -0.00001 | 0.59837  | -0.00001 |
| P  | -2.28429 | 0.34129  | -0.08738 |
| P  | 2.28427  | 0.34128  | 0.08737  |
| C  | -2.40591 | -1.37804 | -0.74659 |
| H  | -2.44609 | -1.26907 | -1.84012 |
| H  | -3.31888 | -1.90588 | -0.44103 |
| C  | 2.40588  | -1.37805 | 0.74659  |
| H  | 3.31886  | -1.90590 | 0.44103  |
| H  | 2.44606  | -1.26909 | 1.84011  |
| C  | -0.00001 | -1.38024 | -0.00002 |
| C  | -0.00002 | -4.20842 | -0.00001 |
| C  | -1.15925 | -2.11553 | -0.34369 |
| C  | 1.15923  | -2.11554 | 0.34367  |
| C  | 1.14911  | -3.50528 | 0.32807  |
| C  | -1.14914 | -3.50527 | -0.32809 |
| H  | 2.05908  | -4.04319 | 0.58905  |
| H  | -2.05912 | -4.04318 | -0.58906 |
| H  | -0.00003 | -5.29400 | -0.00001 |

|   |          |          |          |
|---|----------|----------|----------|
| C | -3.24186 | 1.38821  | -1.29451 |
| H | -2.53421 | 1.41312  | -2.13775 |
| C | -3.20293 | 0.34018  | 1.53556  |
| H | -3.06015 | 1.36370  | 1.91330  |
| C | 3.20292  | 0.34016  | -1.53555 |
| H | 3.06005  | 1.36364  | -1.91336 |
| C | 3.24185  | 1.38819  | 1.29450  |
| H | 2.53419  | 1.41314  | 2.13773  |
| C | 4.56699  | 0.84452  | 1.81066  |
| H | 4.48717  | -0.18752 | 2.16598  |
| H | 4.91039  | 1.45411  | 2.65529  |
| H | 5.35247  | 0.87700  | 1.05104  |
| C | 3.38179  | 2.80470  | 0.75653  |
| H | 4.07518  | 2.84341  | -0.09245 |
| H | 3.77601  | 3.47461  | 1.52894  |
| H | 2.41885  | 3.20810  | 0.42230  |
| C | 4.69225  | 0.03603  | -1.47175 |
| H | 4.89360  | -0.90309 | -0.94188 |
| H | 5.26538  | 0.82885  | -0.98459 |
| H | 5.09178  | -0.07731 | -2.48677 |
| C | 2.49514  | -0.61788 | -2.48721 |
| H | 2.60345  | -1.65783 | -2.15470 |
| H | 2.93289  | -0.54246 | -3.48928 |
| H | 1.42382  | -0.40204 | -2.55051 |
| C | -2.49504 | -0.61772 | 2.48727  |
| H | -2.60324 | -1.65770 | 2.15484  |
| H | -2.93279 | -0.54228 | 3.48934  |
| H | -1.42373 | -0.40177 | 2.55056  |
| C | -4.69222 | 0.03588  | 1.47179  |
| H | -4.89347 | -0.90330 | 0.94198  |
| H | -5.26544 | 0.82860  | 0.98458  |
| H | -5.09173 | -0.07743 | 2.48682  |
| C | -3.38174 | 2.80475  | -0.75656 |
| H | -3.77595 | 3.47465  | -1.52898 |
| H | -2.41878 | 3.20812  | -0.42236 |
| H | -4.07510 | 2.84350  | 0.09243  |
| C | -4.56702 | 0.84458  | -1.81063 |
| H | -4.48724 | -0.18747 | -2.16594 |
| H | -4.91042 | 1.45416  | -2.65526 |
| H | -5.35249 | 0.87708  | -1.05099 |

**TSA1**

EE = -2262.227177

EE + ZPE = -2261.481814

G° = -2261.553828

Imaginary Freq = -756.97

|    |          |         |          |
|----|----------|---------|----------|
| Ir | -0.05760 | 0.42616 | -0.44279 |
| P  | -2.02063 | 0.68997 | 0.79879  |
| P  | 2.21311  | 0.84912 | -0.74750 |
| C  | -2.59348 | 2.32551 | 0.16879  |
| H  | -3.35952 | 2.80669 | 0.78850  |
| H  | -3.03848 | 2.12715 | -0.81739 |
| C  | 2.31789  | 2.69426 | -0.80175 |
| H  | 2.50327  | 2.96506 | -1.85074 |
| H  | 3.17588  | 3.07390 | -0.23018 |
| C  | 1.01726  | 3.30522 | -0.36623 |
| C  | -1.40138 | 4.52968 | 0.23774  |
| C  | 0.95181  | 4.68282 | -0.17050 |
| C  | -0.12607 | 2.49352 | -0.22869 |
| C  | -1.34682 | 3.15364 | 0.04839  |
| C  | -0.25008 | 5.29707 | 0.13953  |
| H  | 1.85584  | 5.28099 | -0.27125 |

|   |          |          |          |
|---|----------|----------|----------|
| H | -0.29233 | 6.37099  | 0.29609  |
| H | -2.35411 | 5.00507  | 0.46275  |
| C | 3.32152  | 0.36736  | -2.18748 |
| H | 2.67469  | 0.61184  | -3.04505 |
| C | 3.59844  | -1.12912 | -2.22712 |
| H | 2.67454  | -1.68829 | -2.38315 |
| H | 4.07846  | -1.48253 | -1.30622 |
| H | 4.27470  | -1.36384 | -3.05757 |
| C | 4.61392  | 1.16191  | -2.35563 |
| H | 5.37160  | 0.87521  | -1.62278 |
| H | 4.47150  | 2.24362  | -2.28544 |
| H | 5.03334  | 0.95453  | -3.34759 |
| C | 3.09181  | 0.34141  | 0.82910  |
| H | 2.80138  | -0.71265 | 0.94501  |
| C | 4.60993  | 0.43063  | 0.85976  |
| H | 4.96249  | 0.14968  | 1.86056  |
| H | 4.96418  | 1.45128  | 0.66846  |
| H | 5.09617  | -0.24015 | 0.14667  |
| C | 2.51481  | 1.11824  | 2.00764  |
| H | 1.42320  | 1.14283  | 1.98272  |
| H | 2.87521  | 2.15471  | 2.01551  |
| H | 2.82994  | 0.64793  | 2.94756  |
| C | -3.51881 | -0.41124 | 0.80359  |
| H | -3.53867 | -0.75657 | -0.23462 |
| C | -3.31038 | -1.63247 | 1.68816  |
| H | -4.08326 | -2.38110 | 1.47675  |
| H | -3.38252 | -1.37865 | 2.75184  |
| H | -2.33681 | -2.10629 | 1.51076  |
| C | -4.85812 | 0.26035  | 1.07206  |
| H | -5.66132 | -0.47312 | 0.92434  |
| H | -5.04886 | 1.08933  | 0.38347  |
| H | -4.94562 | 0.64093  | 2.09455  |
| C | -1.57886 | 1.11509  | 2.56800  |
| H | -0.89907 | 1.96387  | 2.40143  |
| C | -0.78453 | 0.02052  | 3.26685  |
| H | -1.42781 | -0.80826 | 3.58421  |
| H | -0.30246 | 0.42218  | 4.16730  |
| H | -0.00508 | -0.38610 | 2.61585  |
| C | -2.72730 | 1.60092  | 3.43990  |
| H | -3.42685 | 0.79272  | 3.68046  |
| H | -3.29253 | 2.41881  | 2.98197  |
| H | -2.33055 | 1.97467  | 4.39161  |
| C | -0.25044 | -1.64653 | -1.52994 |
| C | 0.40913  | -3.00245 | -1.20480 |
| H | 1.47232  | -2.89643 | -1.42265 |
| H | 0.00348  | -3.77171 | -1.87178 |
| O | 0.20335  | -3.42844 | 0.12977  |
| C | 1.21427  | -3.26155 | 1.03221  |
| C | 3.15186  | -2.87598 | 3.00179  |
| C | 0.83947  | -2.94379 | 2.33304  |
| C | 2.56262  | -3.42720 | 0.72607  |
| C | 3.52084  | -3.22793 | 1.71195  |
| C | 1.80229  | -2.74836 | 3.30835  |
| H | -0.21859 | -2.83466 | 2.55101  |
| H | 2.87466  | -3.71618 | -0.27210 |
| H | 4.57062  | -3.35308 | 1.46112  |
| H | 1.49276  | -2.47881 | 4.31435  |
| H | 3.90695  | -2.71541 | 3.76443  |
| O | 0.39986  | -1.29706 | -2.73846 |
| H | 0.32421  | -0.33707 | -2.82356 |
| C | -1.73967 | -1.78546 | -1.76220 |
| C | -4.47309 | -2.08836 | -2.34637 |

|   |          |          |          |
|---|----------|----------|----------|
| C | -2.46914 | -2.85738 | -1.25038 |
| C | -2.40842 | -0.87163 | -2.58473 |
| C | -3.75538 | -1.01585 | -2.86776 |
| C | -3.82140 | -3.00692 | -1.54084 |
| H | -1.98584 | -3.58421 | -0.60476 |
| H | -1.86527 | -0.02899 | -3.00204 |
| H | -4.24851 | -0.29183 | -3.50985 |
| H | -4.36358 | -3.85468 | -1.13120 |
| H | -5.52735 | -2.20737 | -2.57654 |
| H | 0.19895  | -1.20821 | -0.21872 |

## A2

EE = -2262.245889

EE + ZPE = -2261.499340

G° = -2261.574125

|    |          |          |          |
|----|----------|----------|----------|
| Ir | -0.22800 | 0.35472  | -0.07020 |
| P  | -1.88868 | -0.91677 | 0.97373  |
| P  | 1.01294  | 2.29420  | -0.35951 |
| C  | -3.45171 | -0.07157 | 0.45500  |
| H  | -4.26670 | -0.19352 | 1.17971  |
| H  | -3.77225 | -0.57125 | -0.47205 |
| C  | -0.23318 | 3.49652  | -1.01979 |
| H  | -0.18418 | 3.40163  | -2.11569 |
| H  | 0.00419  | 4.54277  | -0.78650 |
| C  | -1.60414 | 3.09258  | -0.54026 |
| C  | -4.16583 | 2.32640  | 0.23206  |
| C  | -2.62974 | 4.03161  | -0.48699 |
| C  | -1.83488 | 1.74671  | -0.18313 |
| C  | -3.14868 | 1.37700  | 0.17525  |
| C  | -3.90376 | 3.65013  | -0.08938 |
| H  | -2.43584 | 5.06773  | -0.75790 |
| H  | -4.69926 | 4.38823  | -0.03833 |
| H  | -5.17159 | 2.03019  | 0.52374  |
| C  | 2.51249  | 2.43514  | -1.45631 |
| H  | 2.24672  | 1.73366  | -2.25838 |
| C  | 3.74737  | 1.89466  | -0.74268 |
| H  | 3.54128  | 0.97661  | -0.17952 |
| H  | 4.16331  | 2.62567  | -0.04033 |
| H  | 4.53403  | 1.66312  | -1.47064 |
| C  | 2.77404  | 3.79427  | -2.09185 |
| H  | 3.00617  | 4.56913  | -1.35531 |
| H  | 1.92614  | 4.14348  | -2.68851 |
| H  | 3.63522  | 3.72020  | -2.76707 |
| C  | 1.51131  | 2.99510  | 1.30201  |
| H  | 2.23910  | 2.25975  | 1.67566  |
| C  | 2.16549  | 4.36958  | 1.26067  |
| H  | 2.37100  | 4.70881  | 2.28295  |
| H  | 1.50590  | 5.11777  | 0.80427  |
| H  | 3.11428  | 4.37896  | 0.71975  |
| C  | 0.32792  | 3.01703  | 2.26233  |
| H  | -0.13408 | 2.03111  | 2.36434  |
| H  | -0.45050 | 3.71287  | 1.92607  |
| H  | 0.66346  | 3.34542  | 3.25311  |
| C  | -2.20409 | -2.72982 | 0.74139  |
| H  | -2.10263 | -2.81512 | -0.34481 |
| C  | -1.08993 | -3.56094 | 1.36119  |
| H  | -1.14669 | -4.59194 | 0.99155  |
| H  | -1.17199 | -3.60017 | 2.45400  |
| H  | -0.10075 | -3.16659 | 1.09888  |
| C  | -3.58658 | -3.25833 | 1.09611  |
| H  | -3.68048 | -4.28494 | 0.71955  |
| H  | -4.38753 | -2.67264 | 0.63304  |

|   |          |          |          |
|---|----------|----------|----------|
| H | -3.76655 | -3.28864 | 2.17476  |
| C | -1.83228 | -0.51716 | 2.80109  |
| H | -2.00825 | 0.57052  | 2.78051  |
| C | -0.46081 | -0.76241 | 3.41933  |
| H | -0.24385 | -1.83399 | 3.49553  |
| H | -0.43067 | -0.35065 | 4.43554  |
| H | 0.34023  | -0.30513 | 2.83053  |
| C | -2.92361 | -1.15510 | 3.64928  |
| H | -2.74751 | -2.22809 | 3.78244  |
| H | -3.92702 | -1.02374 | 3.23259  |
| H | -2.92300 | -0.70408 | 4.64877  |
| C | 0.54722  | -0.81467 | -1.65914 |
| C | 1.96673  | -1.35897 | -1.56259 |
| H | 2.64181  | -0.50061 | -1.48820 |
| H | 2.21252  | -1.90115 | -2.49146 |
| O | 2.13239  | -2.21972 | -0.45404 |
| C | 3.29978  | -2.17171 | 0.23115  |
| C | 5.61682  | -2.15585 | 1.77835  |
| C | 3.23568  | -2.46512 | 1.59170  |
| C | 4.52623  | -1.87161 | -0.35550 |
| C | 5.67541  | -1.86259 | 0.42494  |
| C | 4.38944  | -2.46139 | 2.35532  |
| H | 2.26369  | -2.68118 | 2.02563  |
| H | 4.58762  | -1.65883 | -1.41816 |
| H | 6.62925  | -1.63027 | -0.03965 |
| H | 4.32878  | -2.68785 | 3.41569  |
| H | 6.51953  | -2.14845 | 2.38039  |
| O | 0.67222  | 0.10464  | -2.74578 |
| H | -0.15552 | 0.59586  | -2.79732 |
| C | -0.47548 | -1.86553 | -2.03622 |
| C | -2.39139 | -3.77053 | -2.83571 |
| C | -0.21341 | -3.23361 | -1.94886 |
| C | -1.71951 | -1.47665 | -2.55051 |
| C | -2.66566 | -2.41084 | -2.93746 |
| C | -1.15939 | -4.17263 | -2.34483 |
| H | 0.73419  | -3.57657 | -1.54843 |
| H | -1.96609 | -0.41994 | -2.63036 |
| H | -3.62154 | -2.07524 | -3.33008 |
| H | -0.92367 | -5.23040 | -2.26699 |
| H | -3.12836 | -4.50483 | -3.14603 |
| H | 0.98177  | -0.47017 | 0.61813  |

## TSA2

EE = -2262.229921

EE + ZPE = -2261.484362

G° = -2261.556354

Imaginary frequency = -431.34

|    |          |         |          |
|----|----------|---------|----------|
| Ir | 0.10121  | 0.14091 | -0.23530 |
| H  | 0.62903  | 0.51869 | -1.65849 |
| P  | 2.10877  | 0.99300 | 0.71407  |
| P  | -1.98772 | 0.13587 | -1.28042 |
| C  | -0.31706 | 2.13849 | -0.24134 |
| C  | -0.80207 | 4.91680 | -0.34854 |
| C  | -1.19576 | 2.69173 | -1.19270 |
| C  | 0.34469  | 3.02850 | 0.62406  |
| C  | 0.09411  | 4.39583 | 0.57296  |
| C  | -1.43692 | 4.06010 | -1.23560 |
| H  | 0.61791  | 5.06060 | 1.25749  |
| H  | -2.12974 | 4.45827 | -1.97480 |
| H  | -0.99476 | 5.98471 | -0.38367 |
| C  | 1.37937  | 2.46739 | 1.55285  |
| H  | 0.91578  | 2.06100 | 2.46184  |

|   |          |          |          |
|---|----------|----------|----------|
| H | 2.12580  | 3.21406  | 1.84865  |
| C | -1.87614 | 1.75735  | -2.15368 |
| H | -2.85019 | 2.13446  | -2.48898 |
| H | -1.25605 | 1.59464  | -3.04763 |
| C | 3.07873  | 0.12003  | 2.05430  |
| H | 2.28471  | -0.45620 | 2.54183  |
| C | 4.10941  | -0.84728 | 1.48756  |
| H | 4.52298  | -1.46340 | 2.29457  |
| H | 4.95106  | -0.32290 | 1.02096  |
| H | 3.68511  | -1.52296 | 0.73740  |
| C | 3.67181  | 1.01785  | 3.13457  |
| H | 4.14199  | 0.39042  | 3.90168  |
| H | 2.90701  | 1.62069  | 3.63260  |
| H | 4.44159  | 1.69575  | 2.75645  |
| C | 3.37989  | 1.64705  | -0.49483 |
| H | 3.80336  | 0.73041  | -0.93371 |
| C | 2.75643  | 2.47138  | -1.61679 |
| H | 1.96620  | 1.93553  | -2.14733 |
| H | 3.53449  | 2.73836  | -2.34138 |
| H | 2.32223  | 3.40346  | -1.23598 |
| C | 4.50682  | 2.44916  | 0.14540  |
| H | 5.12009  | 1.86134  | 0.83131  |
| H | 4.12140  | 3.32045  | 0.68889  |
| H | 5.17191  | 2.83188  | -0.63748 |
| C | -2.41830 | -1.16267 | -2.54752 |
| H | -3.06824 | -1.86071 | -1.99648 |
| C | -3.16284 | -0.63018 | -3.76629 |
| H | -4.06208 | -0.06155 | -3.51928 |
| H | -3.46266 | -1.46560 | -4.40964 |
| H | -2.51056 | 0.01560  | -4.36533 |
| C | -1.16364 | -1.90742 | -2.98304 |
| H | -0.46228 | -1.22739 | -3.48381 |
| H | -1.42374 | -2.69630 | -3.69865 |
| H | -0.63734 | -2.35527 | -2.13618 |
| C | -3.51064 | 0.30459  | -0.22158 |
| H | -3.49797 | -0.61446 | 0.36937  |
| C | -4.82926 | 0.34162  | -0.98086 |
| H | -5.65016 | 0.40523  | -0.25606 |
| H | -5.00126 | -0.55655 | -1.58123 |
| H | -4.90883 | 1.21900  | -1.63498 |
| C | -3.41909 | 1.48427  | 0.73886  |
| H | -4.25481 | 1.43027  | 1.44675  |
| H | -3.48443 | 2.44362  | 0.21255  |
| H | -2.48879 | 1.48433  | 1.31509  |
| C | -0.53636 | -1.18225 | 1.97782  |
| C | 0.34879  | -2.19932 | 1.59918  |
| H | 1.38464  | -2.14150 | 1.92405  |
| O | -0.06140 | -0.18778 | 2.86814  |
| H | -0.16061 | -0.52531 | 3.76589  |
| C | -1.95717 | -1.52815 | 2.10937  |
| C | -4.66997 | -2.24986 | 2.39749  |
| C | -2.51992 | -2.57566 | 1.35741  |
| C | -2.79733 | -0.85241 | 3.00052  |
| C | -4.13186 | -1.20902 | 3.13912  |
| C | -3.84775 | -2.93308 | 1.50612  |
| H | -1.91246 | -3.08758 | 0.61413  |
| H | -2.40323 | -0.01633 | 3.56993  |
| H | -4.75879 | -0.65982 | 3.83655  |
| H | -4.25158 | -3.74590 | 0.90842  |
| H | -5.71326 | -2.52707 | 2.50934  |
| H | -0.02700 | -3.20883 | 1.47080  |
| O | 0.66699  | -2.04150 | -0.23809 |

|   |         |          |          |
|---|---------|----------|----------|
| C | 1.78471 | -2.55569 | -0.75774 |
| C | 4.15512 | -3.63291 | -1.81975 |
| C | 2.25052 | -3.81359 | -0.34776 |
| C | 2.51790 | -1.86357 | -1.72947 |
| C | 3.68208 | -2.40165 | -2.25447 |
| C | 3.42569 | -4.33286 | -0.86768 |
| H | 1.67872 | -4.38289 | 0.37873  |
| H | 2.15121 | -0.89407 | -2.05693 |
| H | 4.23062 | -1.84518 | -3.01021 |
| H | 3.77210 | -5.30498 | -0.52746 |
| H | 5.07326 | -4.04611 | -2.22433 |

### A3

EE = -1877.575979

EE + ZPE = -1876.971541

G° = -1877.036843

|    |          |          |          |
|----|----------|----------|----------|
| Ir | 0.29062  | -0.14033 | -0.01821 |
| H  | 1.03702  | 0.03149  | 1.36728  |
| P  | 1.92290  | -1.79988 | -0.28051 |
| P  | -1.30168 | 1.13204  | 1.13895  |
| C  | -0.80870 | -1.69986 | 0.70550  |
| C  | -2.36410 | -3.86803 | 1.65105  |
| C  | -2.06087 | -1.49268 | 1.32679  |
| C  | -0.37954 | -3.03752 | 0.55278  |
| C  | -1.14882 | -4.09691 | 1.02465  |
| C  | -2.81428 | -2.56487 | 1.79424  |
| H  | -0.78936 | -5.11652 | 0.89575  |
| H  | -3.77562 | -2.37247 | 2.26797  |
| H  | -2.95595 | -4.69885 | 2.02288  |
| C  | 0.90631  | -3.33484 | -0.17916 |
| H  | 0.69414  | -3.62417 | -1.21975 |
| H  | 1.45553  | -4.17494 | 0.26582  |
| C  | -2.63815 | -0.10266 | 1.41852  |
| H  | -3.37031 | 0.04281  | 0.61100  |
| H  | -3.17385 | 0.06761  | 2.36147  |
| C  | 2.86368  | -1.93111 | -1.87712 |
| H  | 2.04751  | -1.84763 | -2.60781 |
| C  | 3.76006  | -0.71001 | -2.04284 |
| H  | 4.22895  | -0.71578 | -3.03330 |
| H  | 4.56780  | -0.69528 | -1.30159 |
| H  | 3.19148  | 0.22036  | -1.93610 |
| C  | 3.58114  | -3.24065 | -2.18268 |
| H  | 3.83241  | -3.26973 | -3.24953 |
| H  | 2.96402  | -4.12047 | -1.97113 |
| H  | 4.51731  | -3.34505 | -1.63089 |
| C  | 3.13092  | -1.88269 | 1.14048  |
| H  | 3.47464  | -0.84317 | 1.24120  |
| C  | 2.40720  | -2.28746 | 2.41971  |
| H  | 1.49450  | -1.71440 | 2.59144  |
| H  | 3.07054  | -2.14113 | 3.27904  |
| H  | 2.13245  | -3.34876 | 2.39663  |
| C  | 4.34030  | -2.78506 | 0.94277  |
| H  | 5.00996  | -2.43383 | 0.15505  |
| H  | 4.04533  | -3.81621 | 0.71284  |
| H  | 4.92022  | -2.81764 | 1.87253  |
| C  | -0.75686 | 1.64767  | 2.85114  |
| H  | 0.17396  | 2.20674  | 2.67436  |
| C  | -1.74710 | 2.54153  | 3.58700  |
| H  | -1.88136 | 3.51535  | 3.11337  |
| H  | -1.38550 | 2.72175  | 4.60599  |
| H  | -2.73163 | 2.06582  | 3.67715  |
| C  | -0.44536 | 0.43620  | 3.71996  |
| H  | -1.35115 | -0.14362 | 3.93420  |

|   |          |          |          |
|---|----------|----------|----------|
| H | -0.03583 | 0.76978  | 4.67991  |
| H | 0.27934  | -0.23655 | 3.25971  |
| C | -2.06978 | 2.62314  | 0.34236  |
| H | -2.14908 | 2.28684  | -0.69605 |
| C | -1.08958 | 3.79016  | 0.33411  |
| H | -1.47712 | 4.59139  | -0.30537 |
| H | -0.11196 | 3.49515  | -0.06161 |
| H | -0.93381 | 4.21722  | 1.33093  |
| C | -3.46934 | 3.02409  | 0.78971  |
| H | -3.87241 | 3.75359  | 0.07569  |
| H | -3.48663 | 3.49454  | 1.77598  |
| H | -4.16291 | 2.17680  | 0.80426  |
| O | 1.25723  | 1.53163  | -1.09212 |
| C | 2.15895  | 2.39669  | -0.67014 |
| C | 4.09141  | 4.29418  | 0.13992  |
| C | 2.54537  | 3.45595  | -1.51312 |
| C | 2.77253  | 2.32025  | 0.59143  |
| C | 3.72021  | 3.25568  | 0.98159  |
| C | 3.49073  | 4.38211  | -1.11157 |
| H | 2.07821  | 3.52645  | -2.49310 |
| H | 2.48011  | 1.51404  | 1.25930  |
| H | 4.17494  | 3.16870  | 1.96555  |
| H | 3.76442  | 5.18823  | -1.78767 |
| H | 4.83295  | 5.02278  | 0.45098  |
| C | -0.20321 | -0.63936 | -2.25328 |
| H | -0.48263 | -1.68478 | -2.32332 |
| H | 0.72145  | -0.34700 | -2.74032 |
| C | -1.19696 | 0.31696  | -2.22033 |
| O | -0.92618 | 1.59929  | -2.47702 |
| H | 0.00727  | 1.77451  | -2.16197 |
| C | -2.63603 | 0.00347  | -2.10930 |
| C | -5.37537 | -0.53043 | -1.91630 |
| C | -3.09151 | -1.27256 | -1.76332 |
| C | -3.57839 | 0.99789  | -2.38381 |
| C | -4.93583 | 0.73178  | -2.28880 |
| C | -4.44675 | -1.53179 | -1.65877 |
| H | -2.38652 | -2.06334 | -1.52654 |
| H | -3.23229 | 1.98244  | -2.67991 |
| H | -5.65346 | 1.51671  | -2.50743 |
| H | -4.77706 | -2.52265 | -1.36198 |
| H | -6.43797 | -0.73687 | -1.83306 |

### TSA3

EE = -1877.530067

EE + ZPE = -1876.927780

G° = -1876.994013

Imaginary Freq = -1323.27

|    |          |          |          |
|----|----------|----------|----------|
| Ir | 0.10824  | 0.03422  | -0.13064 |
| H  | 1.04841  | 1.09271  | 0.86656  |
| P  | 1.85487  | -1.58878 | -0.10857 |
| P  | -1.45441 | 0.90600  | 1.40812  |
| C  | -0.98826 | -1.66069 | 0.10453  |
| C  | -2.50427 | -4.01252 | 0.40766  |
| C  | -2.24675 | -1.63132 | 0.73201  |
| C  | -0.49337 | -2.90331 | -0.33431 |
| C  | -1.25511 | -4.05769 | -0.19336 |
| C  | -2.98529 | -2.80100 | 0.87972  |
| H  | -0.85101 | -5.00763 | -0.53874 |
| H  | -3.95835 | -2.75477 | 1.36505  |
| H  | -3.09008 | -4.91885 | 0.52539  |
| C  | 0.90133  | -2.96655 | -0.89043 |
| H  | 0.91239  | -2.76652 | -1.97037 |
| H  | 1.36147  | -3.95106 | -0.73964 |

|   |          |          |          |
|---|----------|----------|----------|
| C | -2.81577 | -0.32179 | 1.19804  |
| H | -3.46258 | 0.08613  | 0.40758  |
| H | -3.43711 | -0.43299 | 2.09511  |
| C | 3.32586  | -1.29950 | -1.22386 |
| H | 2.90823  | -0.59665 | -1.96021 |
| C | 4.45330  | -0.57700 | -0.49779 |
| H | 5.17138  | -0.18237 | -1.22491 |
| H | 5.00302  | -1.24562 | 0.17205  |
| H | 4.09277  | 0.27097  | 0.09167  |
| C | 3.84290  | -2.51431 | -1.98453 |
| H | 4.64352  | -2.19933 | -2.66469 |
| H | 3.06967  | -2.99127 | -2.59329 |
| H | 4.26434  | -3.27353 | -1.31939 |
| C | 2.50611  | -2.36347 | 1.47085  |
| H | 2.90942  | -1.50596 | 2.03130  |
| C | 1.36218  | -2.98434 | 2.26912  |
| H | 0.46219  | -2.36891 | 2.28718  |
| H | 1.68321  | -3.15895 | 3.30270  |
| H | 1.07977  | -3.95481 | 1.84516  |
| C | 3.59688  | -3.41501 | 1.30340  |
| H | 4.52242  | -3.02713 | 0.87520  |
| H | 3.25325  | -4.24712 | 0.67696  |
| H | 3.84305  | -3.83999 | 2.28417  |
| C | -1.08576 | 1.00826  | 3.23828  |
| H | -0.32724 | 1.80435  | 3.29591  |
| C | -2.26993 | 1.38794  | 4.11653  |
| H | -2.63976 | 2.39654  | 3.92068  |
| H | -1.97545 | 1.34816  | 5.17194  |
| H | -3.10682 | 0.68993  | 3.99352  |
| C | -0.44976 | -0.28112 | 3.72530  |
| H | -1.13680 | -1.13156 | 3.62289  |
| H | -0.18674 | -0.19632 | 4.78594  |
| H | 0.45853  | -0.50664 | 3.16101  |
| C | -2.16302 | 2.57742  | 0.97250  |
| H | -2.03626 | 2.59655  | -0.11633 |
| C | -1.30139 | 3.70148  | 1.53636  |
| H | -1.61624 | 4.65643  | 1.10054  |
| H | -0.24330 | 3.55896  | 1.29341  |
| H | -1.40202 | 3.79533  | 2.62394  |
| C | -3.64242 | 2.78963  | 1.26703  |
| H | -3.94509 | 3.76809  | 0.87336  |
| H | -3.87131 | 2.78687  | 2.33692  |
| H | -4.27713 | 2.04238  | 0.78184  |
| O | 1.22084  | 2.09418  | 0.02082  |
| C | 2.52214  | 2.37789  | -0.19143 |
| C | 5.18920  | 3.08999  | -0.61694 |
| C | 3.01842  | 2.50637  | -1.48937 |
| C | 3.37431  | 2.60396  | 0.89076  |
| C | 4.69755  | 2.95730  | 0.67515  |
| C | 4.34133  | 2.86653  | -1.69465 |
| H | 2.34607  | 2.34204  | -2.32798 |
| H | 2.97261  | 2.50922  | 1.89718  |
| H | 5.34986  | 3.13588  | 1.52515  |
| H | 4.71336  | 2.97664  | -2.70932 |
| H | 6.22349  | 3.37305  | -0.78328 |
| C | 0.06169  | -0.06580 | -2.29956 |
| H | -0.21243 | -1.02780 | -2.72522 |
| H | 0.95543  | 0.37491  | -2.74275 |
| C | -0.97879 | 0.84098  | -1.93822 |
| O | -0.71160 | 2.20250  | -2.01627 |
| H | 0.04437  | 2.40315  | -1.43669 |
| C | -2.41647 | 0.54455  | -2.14249 |

|   |          |          |          |
|---|----------|----------|----------|
| C | -5.16301 | 0.03613  | -2.47078 |
| C | -2.89739 | -0.76234 | -2.28602 |
| C | -3.34235 | 1.59086  | -2.20987 |
| C | -4.69745 | 1.33871  | -2.36909 |
| C | -4.25062 | -1.01133 | -2.43737 |
| H | -2.21485 | -1.60526 | -2.24926 |
| H | -2.98268 | 2.61190  | -2.14812 |
| H | -5.39333 | 2.17166  | -2.41849 |
| H | -4.59388 | -2.03824 | -2.52537 |
| H | -6.22376 | -0.16247 | -2.58949 |

# A4i

EE = -1877.575979

EE + ZPE = -1876.971541

G° = -1877.036843

|    |          |          |          |
|----|----------|----------|----------|
| Ir | -0.06417 | 0.08556  | 0.30363  |
| P  | -2.28412 | -0.51691 | -0.01172 |
| P  | 1.93616  | 1.27745  | 0.47437  |
| C  | -2.71561 | 0.57996  | -1.43403 |
| H  | -3.79108 | 0.78026  | -1.51824 |
| H  | -2.42417 | 0.01704  | -2.33480 |
| C  | 1.29039  | 3.00954  | 0.35615  |
| H  | 1.03276  | 3.32579  | 1.37460  |
| H  | 2.05229  | 3.70647  | -0.01721 |
| C  | -1.90371 | 1.84337  | -1.31557 |
| C  | -0.37306 | 4.15482  | -1.14662 |
| C  | -2.32240 | 3.01182  | -1.94459 |
| C  | -0.69952 | 1.80906  | -0.58261 |
| C  | 0.04597  | 3.00176  | -0.49278 |
| C  | -1.55642 | 4.16497  | -1.87204 |
| H  | -3.25452 | 3.01445  | -2.50662 |
| H  | -1.88281 | 5.07119  | -2.37308 |
| H  | 0.22659  | 5.06059  | -1.07571 |
| C  | -3.41638 | 0.01533  | 1.35853  |
| H  | -3.22415 | 1.10086  | 1.35860  |
| C  | -2.98475 | -0.54697 | 2.70736  |
| H  | -1.91084 | -0.42829 | 2.87886  |
| H  | -3.21575 | -1.61436 | 2.78539  |
| H  | -3.52263 | -0.03660 | 3.51438  |
| C  | -4.90097 | -0.21598 | 1.12027  |
| H  | -5.23807 | 0.12684  | 0.13683  |
| H  | -5.48517 | 0.32414  | 1.87423  |
| H  | -5.15504 | -1.27702 | 1.21774  |
| C  | -2.64446 | -2.24268 | -0.58318 |
| H  | -1.84113 | -2.38566 | -1.32438 |
| C  | -2.41379 | -3.24550 | 0.54040  |
| H  | -2.38095 | -4.26149 | 0.13168  |
| H  | -3.23384 | -3.21521 | 1.26787  |
| H  | -1.46869 | -3.05594 | 1.06175  |
| C  | -3.97950 | -2.45842 | -1.28193 |
| H  | -4.15720 | -1.74108 | -2.08961 |
| H  | -4.81898 | -2.39577 | -0.58325 |
| H  | -4.00105 | -3.46129 | -1.72415 |
| C  | 3.21495  | 1.26502  | -0.88163 |
| H  | 3.82736  | 2.15637  | -0.66627 |
| C  | 4.11351  | 0.03725  | -0.87235 |
| H  | 3.53053  | -0.88770 | -0.94642 |
| H  | 4.73980  | -0.01691 | 0.02240  |
| H  | 4.78403  | 0.07118  | -1.73892 |
| C  | 2.55301  | 1.44082  | -2.24162 |
| H  | 1.91573  | 2.32866  | -2.29707 |
| H  | 1.93523  | 0.56859  | -2.48363 |

|   |          |          |          |
|---|----------|----------|----------|
| H | 3.32252  | 1.52640  | -3.01728 |
| C | 2.93151  | 1.14299  | 2.04103  |
| H | 3.90769  | 1.60978  | 1.83490  |
| C | 3.12122  | -0.33018 | 2.39627  |
| H | 3.72181  | -0.41509 | 3.30920  |
| H | 3.62186  | -0.90223 | 1.61058  |
| H | 2.15266  | -0.81532 | 2.56273  |
| C | 2.26749  | 1.86825  | 3.20279  |
| H | 2.81463  | 1.65749  | 4.12838  |
| H | 1.23863  | 1.51525  | 3.34676  |
| H | 2.24573  | 2.95399  | 3.07467  |
| O | 0.61587  | -1.86024 | 1.02383  |
| C | 1.24383  | -2.42586 | 0.03527  |
| C | 2.69157  | -3.54277 | -2.13280 |
| C | 2.17580  | -3.46738 | 0.23426  |
| C | 1.05123  | -1.99572 | -1.29954 |
| C | 1.77243  | -2.53010 | -2.35906 |
| C | 2.87575  | -4.00455 | -0.82829 |
| H | 2.33560  | -3.81403 | 1.25174  |
| H | 0.26712  | -1.24563 | -1.51714 |
| H | 1.60266  | -2.15974 | -3.36723 |
| H | 3.59231  | -4.80061 | -0.64094 |
| H | 3.24913  | -3.97645 | -2.95619 |
| H | -0.50533 | 0.84369  | 1.58293  |

#### A4ii

EE = -1954.933148

EE + ZPE = -1954.290278

G° = -1954.355885

|    |          |          |          |
|----|----------|----------|----------|
| Ir | 0.18628  | -0.25711 | -0.03278 |
| P  | -1.48314 | 1.40786  | 0.17033  |
| P  | 2.41846  | -0.88290 | 0.01483  |
| C  | 1.12881  | 1.37543  | -1.00400 |
| C  | 2.46884  | 3.69490  | -2.00036 |
| C  | 2.49405  | 1.36342  | -1.37931 |
| C  | 0.44804  | 2.58080  | -1.29126 |
| C  | 1.10586  | 3.71671  | -1.75165 |
| C  | 3.15117  | 2.50085  | -1.83901 |
| H  | 0.53537  | 4.62700  | -1.92760 |
| H  | 4.21025  | 2.44127  | -2.08403 |
| H  | 2.98458  | 4.58681  | -2.34272 |
| C  | -1.03901 | 2.59529  | -1.15442 |
| H  | -1.48660 | 2.18198  | -2.06929 |
| H  | -1.45798 | 3.59735  | -1.01279 |
| C  | 3.22734  | 0.05798  | -1.32694 |
| H  | 3.04830  | -0.50384 | -2.25336 |
| H  | 4.31111  | 0.16564  | -1.20999 |
| C  | -3.33934 | 1.17648  | -0.03851 |
| H  | -3.40430 | 0.24458  | -0.61558 |
| C  | -4.06834 | 0.96004  | 1.28207  |
| H  | -5.08277 | 0.59686  | 1.07896  |
| H  | -4.16474 | 1.89780  | 1.84255  |
| H  | -3.57234 | 0.22447  | 1.91833  |
| C  | -4.03969 | 2.26459  | -0.84576 |
| H  | -5.10007 | 2.00333  | -0.94381 |
| H  | -3.63955 | 2.37323  | -1.85660 |
| H  | -3.99359 | 3.24409  | -0.35729 |
| C  | -1.30076 | 2.36238  | 1.77240  |
| H  | -1.90046 | 1.78187  | 2.48691  |
| C  | 0.13823  | 2.38443  | 2.27148  |
| H  | 0.53497  | 1.37100  | 2.39440  |
| H  | 0.18686  | 2.90737  | 3.23485  |

|   |          |          |          |
|---|----------|----------|----------|
| H | 0.79785  | 2.90731  | 1.56834  |
| C | -1.84938 | 3.78141  | 1.70825  |
| H | -2.88352 | 3.83242  | 1.35628  |
| H | -1.23348 | 4.40712  | 1.05108  |
| H | -1.81853 | 4.23722  | 2.70495  |
| C | 3.19738  | -0.21734 | 1.58030  |
| H | 2.62178  | 0.70836  | 1.71731  |
| C | 2.91062  | -1.12478 | 2.76781  |
| H | 1.83748  | -1.31172 | 2.88331  |
| H | 3.26720  | -0.65941 | 3.69361  |
| H | 3.41530  | -2.09440 | 2.67793  |
| C | 4.66704  | 0.17296  | 1.49919  |
| H | 5.32474  | -0.67362 | 1.28099  |
| H | 4.98228  | 0.58951  | 2.46338  |
| H | 4.84065  | 0.94593  | 0.74461  |
| C | 2.96887  | -2.64422 | -0.22174 |
| H | 2.45359  | -3.21024 | 0.56581  |
| C | 4.46709  | -2.88145 | -0.09236 |
| H | 4.69985  | -3.92276 | -0.34552 |
| H | 4.83941  | -2.70117 | 0.91947  |
| H | 5.03573  | -2.24734 | -0.78326 |
| C | 2.47135  | -3.14223 | -1.57600 |
| H | 3.09006  | -2.74328 | -2.38811 |
| H | 1.43470  | -2.85181 | -1.77620 |
| H | 2.53898  | -4.23454 | -1.62516 |
| C | -1.32994 | -1.61484 | 0.86082  |
| C | -0.09047 | -2.26959 | 0.71094  |
| O | -1.74449 | -1.24721 | 2.14860  |
| H | -0.96582 | -0.91289 | 2.60370  |
| C | -2.47703 | -2.00638 | 0.00519  |
| C | -4.64179 | -2.77637 | -1.59767 |
| C | -3.71856 | -2.28811 | 0.57303  |
| C | -2.33175 | -2.13402 | -1.37925 |
| C | -3.40239 | -2.51396 | -2.17041 |
| C | -4.79108 | -2.66614 | -0.22395 |
| H | -3.83927 | -2.20401 | 1.64752  |
| H | -1.37300 | -1.88412 | -1.83048 |
| H | -3.27221 | -2.59514 | -3.24564 |
| H | -5.75172 | -2.87781 | 0.23712  |
| H | -5.48297 | -3.06586 | -2.22003 |
| H | 0.45854  | -2.51578 | 1.62045  |
| H | 0.00458  | -3.01157 | -0.07979 |

#### TSA4

EE = -1877.530067

EE + ZPE = -1876.927780

G° = -1876.994013

Imaginary Freq = -1275.25

|    |          |          |          |
|----|----------|----------|----------|
| Ir | -0.15770 | 0.07506  | 0.05213  |
| P  | -2.06619 | -1.22797 | -0.12452 |
| P  | 1.32127  | 1.86002  | 0.24812  |
| C  | -3.15824 | -0.06226 | -1.04851 |
| H  | -4.22754 | -0.27148 | -0.91558 |
| H  | -2.93036 | -0.20804 | -2.11406 |
| C  | 0.16670  | 3.19091  | 0.82388  |
| H  | 0.11853  | 3.11430  | 1.91576  |
| H  | 0.53626  | 4.19626  | 0.57947  |
| C  | -2.79260 | 1.33288  | -0.61662 |
| C  | -2.11383 | 3.93649  | 0.08163  |
| C  | -3.71403 | 2.36585  | -0.76160 |
| C  | -1.50195 | 1.58198  | -0.09459 |
| C  | -1.18944 | 2.91370  | 0.25034  |

|   |          |          |          |
|---|----------|----------|----------|
| C | -3.37973 | 3.66612  | -0.41858 |
| H | -4.70260 | 2.14727  | -1.16084 |
| H | -4.10232 | 4.46730  | -0.54132 |
| H | -1.84235 | 4.95510  | 0.35214  |
| C | -2.98694 | -1.50736 | 1.46625  |
| H | -3.24009 | -0.46810 | 1.73189  |
| C | -2.07780 | -2.06074 | 2.55500  |
| H | -1.19300 | -1.43206 | 2.68822  |
| H | -1.73477 | -3.07462 | 2.32223  |
| H | -2.61858 | -2.10452 | 3.50766  |
| C | -4.27448 | -2.31007 | 1.35427  |
| H | -4.93471 | -1.95290 | 0.55708  |
| H | -4.83325 | -2.24640 | 2.29534  |
| H | -4.06768 | -3.37109 | 1.17565  |
| C | -1.99553 | -2.77373 | -1.15445 |
| H | -1.31335 | -2.44511 | -1.95577 |
| C | -1.31508 | -3.91197 | -0.40484 |
| H | -1.09983 | -4.73619 | -1.09427 |
| H | -1.96704 | -4.31163 | 0.38133  |
| H | -0.37506 | -3.58833 | 0.05258  |
| C | -3.30391 | -3.22130 | -1.79129 |
| H | -3.80663 | -2.41907 | -2.34030 |
| H | -4.00392 | -3.61240 | -1.04742 |
| H | -3.10454 | -4.03053 | -2.50381 |
| C | 2.02540  | 2.63112  | -1.30157 |
| H | 2.32303  | 3.64686  | -0.99428 |
| C | 3.24875  | 1.90132  | -1.83363 |
| H | 3.01789  | 0.85347  | -2.05723 |
| H | 4.09193  | 1.91814  | -1.13706 |
| H | 3.58279  | 2.37342  | -2.76497 |
| C | 0.95559  | 2.72961  | -2.37990 |
| H | 0.07294  | 3.28965  | -2.05643 |
| H | 0.61839  | 1.72787  | -2.67495 |
| H | 1.36640  | 3.22408  | -3.26804 |
| C | 2.75843  | 1.95444  | 1.44150  |
| H | 3.36496  | 2.80924  | 1.10302  |
| C | 3.59733  | 0.68418  | 1.39904  |
| H | 4.51602  | 0.82101  | 1.98095  |
| H | 3.87891  | 0.37033  | 0.39069  |
| H | 3.04482  | -0.14787 | 1.84996  |
| C | 2.30803  | 2.20473  | 2.87481  |
| H | 3.16040  | 2.08715  | 3.55365  |
| H | 1.54621  | 1.47493  | 3.17923  |
| H | 1.90297  | 3.20815  | 3.02861  |
| O | 1.01959  | -1.81729 | 0.59084  |
| C | 2.24049  | -2.05932 | 0.09202  |
| C | 4.77107  | -2.66713 | -0.94584 |
| C | 3.19087  | -2.72279 | 0.87474  |
| C | 2.56902  | -1.72720 | -1.22488 |
| C | 3.82321  | -2.02776 | -1.73452 |
| C | 4.44218  | -3.01659 | 0.35924  |
| H | 2.92301  | -2.98894 | 1.89368  |
| H | 1.81212  | -1.22602 | -1.82743 |
| H | 4.06178  | -1.75954 | -2.76072 |
| H | 5.17185  | -3.52495 | 0.98358  |
| H | 5.75334  | -2.89802 | -1.34544 |
| H | 0.63204  | -0.73903 | 1.27124  |

## Products

### 5 (Phenol)

EE = -307.325357

EE + ZPE = -307.221283

G° = -307.250277

|   |          |          |         |
|---|----------|----------|---------|
| O | 0.05019  | 2.29241  | 0.00000 |
| C | 0.00000  | 0.93801  | 0.00000 |
| C | 0.02043  | -1.84628 | 0.00000 |
| C | -1.19782 | 0.23148  | 0.00000 |
| C | 1.21015  | 0.25131  | 0.00000 |
| C | 1.21323  | -1.13252 | 0.00000 |
| C | -1.18172 | -1.15615 | 0.00000 |
| H | -2.14317 | 0.77088  | 0.00000 |
| H | 2.13138  | 0.82478  | 0.00000 |
| H | 2.16129  | -1.66192 | 0.00000 |
| H | -2.12201 | -1.69920 | 0.00000 |
| H | 0.02977  | -2.93104 | 0.00000 |
| H | -0.84433 | 2.64219  | 0.00000 |

### 6 (Enolate)

EE = -384.681142

EE + ZPE = -384.543763

G° = -384.575940

|   |          |          |          |
|---|----------|----------|----------|
| H | 3.52334  | 1.01279  | -0.40997 |
| C | 2.44227  | 1.06798  | -0.44998 |
| H | 1.97923  | 1.93840  | -0.89507 |
| C | 1.70304  | 0.05288  | -0.00757 |
| C | 0.22795  | 0.03927  | -0.00662 |
| C | -2.56731 | -0.00780 | -0.01332 |
| C | -0.50378 | 1.20384  | 0.23124  |
| C | -0.46484 | -1.15120 | -0.23673 |
| C | -1.85126 | -1.17308 | -0.24276 |
| C | -1.88797 | 1.18068  | 0.22278  |
| H | 0.02656  | 2.12679  | 0.44619  |
| H | 0.08906  | -2.06153 | -0.45043 |
| H | -2.37431 | -2.10460 | -0.43581 |
| H | -2.44265 | 2.09396  | 0.41484  |
| H | -3.65260 | -0.02478 | -0.01463 |
| O | 2.31755  | -1.08718 | 0.41922  |
| H | 1.72243  | -1.55902 | 1.00887  |

### 7 (Acetophenone)

EE = -384.706917

EE + ZPE = -384.569956

G° = -384.602631

|   |          |          |          |
|---|----------|----------|----------|
| C | -0.20468 | -0.05449 | -0.00022 |
| C | 2.57456  | 0.10935  | 0.00018  |
| C | 0.42842  | 1.18754  | -0.00015 |
| C | 0.57116  | -1.21343 | -0.00006 |
| C | 1.95173  | -1.13328 | 0.00013  |
| C | 1.81270  | 1.26892  | 0.00004  |
| H | -0.15720 | 2.10183  | -0.00025 |
| H | 0.05722  | -2.16950 | -0.00012 |
| H | 2.54858  | -2.04001 | 0.00024  |
| H | 2.29880  | 2.23941  | 0.00008  |
| H | 3.65847  | 0.17335  | 0.00034  |
| C | -1.69109 | -0.20480 | -0.00047 |
| O | -2.20269 | -1.30000 | 0.00020  |
| C | -2.53415 | 1.04381  | 0.00011  |
| H | -2.32510 | 1.65876  | 0.88184  |
| H | -3.58523 | 0.75535  | 0.00051  |
| H | -2.32584 | 1.65901  | -0.88161 |

**Reaction between (PCP)Ir and 1 along path B  
B2**

EE = -2262.257365

EE + ZPE = -2261.507327

G° = -2261.582851

|    |          |          |          |
|----|----------|----------|----------|
| Ir | -0.65902 | 0.42028  | -0.33152 |
| P  | 0.93382  | 2.01580  | 0.14302  |
| P  | -2.64873 | -0.73939 | -0.49549 |
| C  | -1.86796 | 2.02261  | -0.33917 |
| C  | -3.57409 | 4.27141  | 0.07286  |
| C  | -3.28064 | 1.91128  | -0.36332 |
| C  | -1.36247 | 3.34571  | -0.21980 |
| C  | -2.19829 | 4.43210  | 0.00751  |
| C  | -4.10444 | 3.00930  | -0.14116 |
| H  | -1.76012 | 5.42274  | 0.12121  |
| H  | -5.18450 | 2.86854  | -0.14527 |
| H  | -4.22324 | 5.12090  | 0.26229  |
| C  | 0.11035  | 3.56496  | -0.40095 |
| H  | 0.47540  | 4.46839  | 0.09956  |
| H  | 0.33848  | 3.66796  | -1.47084 |
| C  | -3.90263 | 0.59242  | -0.71726 |
| H  | -4.83047 | 0.39486  | -0.16460 |
| H  | -4.16828 | 0.59769  | -1.78396 |
| C  | 1.16674  | 2.21223  | 1.99390  |
| H  | 0.21198  | 1.81253  | 2.36637  |
| C  | 2.28641  | 1.31007  | 2.49513  |
| H  | 2.25045  | 1.22743  | 3.58808  |
| H  | 3.27359  | 1.70766  | 2.23067  |
| H  | 2.22306  | 0.29835  | 2.07744  |
| C  | 1.30517  | 3.63303  | 2.51975  |
| H  | 1.41951  | 3.61253  | 3.61080  |
| H  | 0.41829  | 4.23468  | 2.29788  |
| H  | 2.17949  | 4.15049  | 2.11042  |
| C  | 2.62621  | 2.07721  | -0.63323 |
| H  | 3.12545  | 1.16677  | -0.27164 |
| C  | 2.48234  | 1.96735  | -2.14654 |
| H  | 1.78039  | 1.17781  | -2.43802 |
| H  | 3.45641  | 1.75806  | -2.60505 |
| H  | 2.11437  | 2.90531  | -2.57897 |
| C  | 3.47667  | 3.28638  | -0.27188 |
| H  | 3.72667  | 3.32880  | 0.79205  |
| H  | 2.97156  | 4.22307  | -0.53892 |
| H  | 4.42269  | 3.25853  | -0.82824 |
| C  | -3.00467 | -1.88406 | -1.93375 |
| H  | -2.58513 | -1.28953 | -2.76047 |
| C  | -2.19813 | -3.16722 | -1.82367 |
| H  | -1.13229 | -2.95686 | -1.69847 |
| H  | -2.31744 | -3.77790 | -2.72637 |
| H  | -2.51849 | -3.77694 | -0.96919 |
| C  | -4.46167 | -2.18457 | -2.26505 |
| H  | -4.90526 | -2.89401 | -1.56160 |
| H  | -4.52223 | -2.64012 | -3.26112 |
| H  | -5.09080 | -1.28997 | -2.27891 |
| C  | -3.15485 | -1.61854 | 1.07585  |
| H  | -2.35111 | -2.35183 | 1.24062  |
| C  | -4.48895 | -2.34955 | 1.06231  |
| H  | -4.73004 | -2.69618 | 2.07491  |
| H  | -4.48196 | -3.22888 | 0.41323  |
| H  | -5.31111 | -1.69759 | 0.74239  |
| C  | -3.11431 | -0.60797 | 2.21775  |
| H  | -3.22645 | -1.12294 | 3.17984  |
| H  | -3.93329 | 0.11732  | 2.13304  |

|   |          |          |          |
|---|----------|----------|----------|
| H | -2.17652 | -0.04100 | 2.22197  |
| O | 0.89376  | -1.47357 | -0.14033 |
| C | 1.51303  | -1.88783 | -1.35067 |
| H | 1.60221  | -0.97859 | -1.95285 |
| H | 0.87680  | -2.59130 | -1.90254 |
| C | 2.88750  | -2.51776 | -1.14734 |
| C | 0.54336  | -2.42573 | 0.79172  |
| C | -0.25790 | -4.18926 | 2.78873  |
| C | 0.42961  | -3.78137 | 0.51007  |
| C | 0.26281  | -1.95062 | 2.06869  |
| C | -0.13412 | -2.83107 | 3.05947  |
| C | 0.02440  | -4.65388 | 1.51501  |
| H | 0.63661  | -4.16979 | -0.48114 |
| H | 0.32422  | -0.88031 | 2.24340  |
| H | -0.35711 | -2.44905 | 4.05108  |
| H | -0.06803 | -5.71145 | 1.28761  |
| H | -0.57152 | -4.87800 | 3.56614  |
| C | 3.91765  | -1.53908 | -0.64901 |
| C | 5.82189  | 0.27343  | 0.27935  |
| C | 4.16834  | -1.41724 | 0.71405  |
| C | 4.62975  | -0.74599 | -1.54472 |
| C | 5.57907  | 0.15331  | -1.08275 |
| C | 5.11364  | -0.51324 | 1.17736  |
| H | 3.61910  | -2.04162 | 1.41696  |
| H | 4.42964  | -0.84030 | -2.60904 |
| H | 6.13000  | 0.76778  | -1.78938 |
| H | 5.29990  | -0.42537 | 2.24369  |
| H | 6.56538  | 0.97778  | 0.64007  |
| H | 2.80459  | -3.32805 | -0.40461 |
| O | 3.19478  | -3.04082 | -2.42166 |
| H | 4.09023  | -3.38779 | -2.39595 |

**TSB1**

EE = -2262.200786

EE + ZPE = -2261.454192

G° = -2261.528539

Imaginary Freq = -568.78

|    |          |          |          |
|----|----------|----------|----------|
| Ir | -0.27880 | 0.34123  | 0.13296  |
| P  | 1.68893  | 1.06666  | 1.09275  |
| P  | -2.45141 | 0.35279  | -0.74740 |
| C  | -0.49408 | 2.32608  | -0.24177 |
| C  | -0.85739 | 5.11016  | -0.64852 |
| C  | -1.46032 | 2.82796  | -1.14200 |
| C  | 0.25991  | 3.28597  | 0.47205  |
| C  | 0.08401  | 4.64901  | 0.25950  |
| C  | -1.63548 | 4.19238  | -1.33928 |
| H  | 0.68531  | 5.35935  | 0.82475  |
| H  | -2.39224 | 4.54028  | -2.04036 |
| H  | -0.99169 | 6.17585  | -0.80794 |
| C  | 1.23329  | 2.80623  | 1.51112  |
| H  | 0.74004  | 2.75267  | 2.49324  |
| H  | 2.10077  | 3.47066  | 1.62099  |
| C  | -2.33357 | 1.83566  | -1.84525 |
| H  | -3.30450 | 2.25550  | -2.13557 |
| H  | -1.84888 | 1.46453  | -2.76216 |
| C  | 2.13937  | 0.28880  | 2.72439  |
| H  | 1.13495  | 0.14054  | 3.15324  |
| C  | 2.75793  | -1.08565 | 2.51366  |
| H  | 2.87324  | -1.60003 | 3.47499  |
| H  | 3.75508  | -1.00997 | 2.06137  |
| H  | 2.12951  | -1.70531 | 1.86519  |
| C  | 2.94853  | 1.13332  | 3.69959  |

|   |          |          |          |
|---|----------|----------|----------|
| H | 2.97230  | 0.63826  | 4.67804  |
| H | 2.52270  | 2.13016  | 3.84946  |
| H | 3.98602  | 1.25703  | 3.37683  |
| C | 3.21953  | 1.20911  | 0.04377  |
| H | 3.39380  | 0.18053  | -0.29315 |
| C | 2.90710  | 2.06058  | -1.18131 |
| H | 2.00836  | 1.71345  | -1.70149 |
| H | 3.75166  | 2.02018  | -1.88003 |
| H | 2.74692  | 3.11156  | -0.91168 |
| C | 4.47768  | 1.70959  | 0.73618  |
| H | 4.84804  | 1.01091  | 1.49161  |
| H | 4.32651  | 2.68500  | 1.21519  |
| H | 5.27565  | 1.83458  | -0.00704 |
| C | -3.15884 | -0.95669 | -1.88624 |
| H | -2.25746 | -1.31711 | -2.40560 |
| C | -3.75847 | -2.12296 | -1.11187 |
| H | -3.08427 | -2.51295 | -0.34310 |
| H | -3.99403 | -2.94653 | -1.79579 |
| H | -4.69427 | -1.83566 | -0.61806 |
| C | -4.11602 | -0.46470 | -2.96638 |
| H | -5.04147 | -0.05498 | -2.55207 |
| H | -4.39531 | -1.30689 | -3.61125 |
| H | -3.66934 | 0.30001  | -3.60732 |
| C | -3.78274 | 0.72500  | 0.51151  |
| H | -3.87752 | -0.22750 | 1.05589  |
| C | -5.14259 | 1.11020  | -0.05292 |
| H | -5.82347 | 1.36506  | 0.76812  |
| H | -5.61286 | 0.30729  | -0.62584 |
| H | -5.07390 | 1.99623  | -0.69565 |
| C | -3.30735 | 1.78674  | 1.49857  |
| H | -4.03711 | 1.88644  | 2.31106  |
| H | -3.20772 | 2.76564  | 1.01363  |
| H | -2.32994 | 1.53860  | 1.92589  |
| O | 0.10141  | -1.79248 | 0.65151  |
| C | 0.20811  | -1.75437 | -1.20855 |
| H | 0.30356  | -0.87662 | -1.86153 |
| H | -0.73856 | -2.27075 | -1.35145 |
| C | 1.36898  | -2.71210 | -1.36954 |
| C | -0.87880 | -2.54702 | 1.17867  |

### B3

EE = -2262.273920

EE + ZPE = -2261.525430

G° = -2261.599723

|    |          |          |          |
|----|----------|----------|----------|
| Ir | -0.35683 | 0.12255  | 0.02329  |
| P  | 1.47006  | 1.42418  | 0.69310  |
| P  | -2.09420 | -1.46125 | -0.01082 |
| C  | 2.25664  | 0.28281  | 1.91380  |
| H  | 2.88711  | -0.38576 | 1.31316  |
| H  | 2.91787  | 0.78850  | 2.62555  |
| C  | -2.41153 | -1.55632 | 1.80653  |
| H  | -2.92913 | -2.47556 | 2.11044  |
| H  | -3.09233 | -0.71903 | 2.02524  |
| C  | 1.14760  | -0.47128 | 2.59143  |
| C  | -0.94927 | -1.80259 | 3.83651  |
| C  | -0.03685 | -0.71118 | 1.85520  |
| C  | 1.27006  | -0.89536 | 3.90888  |
| C  | 0.23022  | -1.57609 | 4.52898  |
| C  | -1.09724 | -1.36620 | 2.52338  |
| H  | 2.18919  | -0.69413 | 4.45639  |
| H  | 0.33517  | -1.91623 | 5.55478  |
| H  | -1.77476 | -2.31566 | 4.32673  |

|   |          |          |          |
|---|----------|----------|----------|
| C | 0.94998  | 2.90991  | 1.69652  |
| H | 0.01694  | 2.55443  | 2.15999  |
| C | 0.61227  | 4.09132  | 0.79567  |
| H | 1.52268  | 4.56013  | 0.40519  |
| H | 0.07312  | 4.85417  | 1.36831  |
| H | -0.02069 | 3.80632  | -0.05101 |
| C | 1.89248  | 3.31161  | 2.82236  |
| H | 2.88966  | 3.57564  | 2.45450  |
| H | 1.99973  | 2.52215  | 3.57240  |
| H | 1.48994  | 4.19341  | 3.33487  |
| C | 2.82489  | 1.85570  | -0.49509 |
| H | 3.13064  | 0.84961  | -0.81909 |
| C | 4.04763  | 2.52849  | 0.10999  |
| H | 4.84661  | 2.57312  | -0.64019 |
| H | 4.44249  | 1.98439  | 0.97504  |
| H | 3.83285  | 3.55776  | 0.41920  |
| C | -1.69311 | -3.20645 | -0.53644 |
| H | -1.15515 | -3.09445 | -1.48794 |
| C | -0.74328 | -3.86589 | 0.45764  |
| H | -0.35026 | -4.78951 | 0.01884  |
| H | -1.26538 | -4.13443 | 1.38393  |
| H | 0.10251  | -3.23244 | 0.73050  |
| C | -2.89990 | -4.11118 | -0.74504 |
| H | -2.55209 | -5.12437 | -0.97920 |
| H | -3.54196 | -3.78898 | -1.56748 |
| H | -3.51294 | -4.18346 | 0.16188  |
| C | -3.67547 | -0.91889 | -0.81366 |
| H | -3.70982 | 0.13674  | -0.50276 |
| C | -3.49986 | -0.93686 | -2.32840 |
| H | -3.45432 | -1.95902 | -2.72293 |
| H | -2.58822 | -0.40614 | -2.62725 |
| H | -4.34704 | -0.43384 | -2.80775 |
| C | -4.97284 | -1.57152 | -0.35671 |
| H | -5.09104 | -2.58906 | -0.73698 |
| H | -5.81839 | -0.98343 | -0.73225 |
| H | -5.06258 | -1.60551 | 0.73434  |
| O | -0.98843 | 1.31159  | -1.68804 |
| C | -2.03724 | 2.02885  | -1.39030 |
| C | -4.42509 | 3.43180  | -0.76730 |
| C | -2.40379 | 2.32965  | -0.05613 |
| C | -2.89695 | 2.50930  | -2.40192 |
| C | -4.05885 | 3.18758  | -2.09120 |
| C | -3.58137 | 3.00158  | 0.24522  |
| H | -1.73058 | 2.04174  | 0.76069  |
| H | -2.62508 | 2.29893  | -3.43310 |
| H | -4.70334 | 3.53073  | -2.89704 |
| H | -3.83126 | 3.20112  | 1.28443  |
| H | -5.34124 | 3.96516  | -0.53594 |
| C | 0.73550  | -0.85922 | -1.45166 |
| H | -0.01730 | -1.27563 | -2.13000 |
| H | 1.22408  | -0.04620 | -1.99759 |
| C | 1.72124  | -1.97539 | -1.11589 |
| H | 1.64007  | -2.23676 | -0.04771 |
| O | 1.34151  | -3.09753 | -1.91311 |
| H | 1.98577  | -3.79547 | -1.76379 |
| C | 3.16363  | -1.61672 | -1.38889 |
| C | 5.81679  | -0.88654 | -1.87652 |
| C | 4.13777  | -1.78453 | -0.41105 |
| C | 3.54650  | -1.12593 | -2.63774 |
| C | 4.85938  | -0.75682 | -2.87792 |
| C | 5.45693  | -1.41282 | -0.64605 |
| H | 3.85605  | -2.20550 | 0.55268  |

|   |         |          |          |
|---|---------|----------|----------|
| H | 2.79645 | -1.02513 | -3.41828 |
| H | 5.14191 | -0.36516 | -3.85059 |
| H | 6.20282 | -1.53805 | 0.13308  |
| H | 6.84418 | -0.58961 | -2.06356 |
| C | 2.31123 | 2.59644  | -1.72561 |
| H | 3.04251 | 2.50512  | -2.53802 |
| H | 2.18025 | 3.66450  | -1.52355 |
| H | 1.34917 | 2.20796  | -2.07792 |

# TSB2

EE = -2262.236654

EE + ZPE = -2261.490865

G° = -2261.563732

Imaginary Freq = -158.14

|    |          |          |          |
|----|----------|----------|----------|
| Ir | -0.09709 | -0.19094 | -0.17878 |
| P  | 1.39813  | 1.55644  | 0.39647  |
| P  | -1.93141 | -1.62452 | -0.00515 |
| C  | 1.83585  | 1.04084  | 2.11644  |
| H  | 2.60445  | 0.26089  | 2.00315  |
| H  | 2.28690  | 1.84291  | 2.71144  |
| C  | -2.62335 | -1.21690 | 1.66224  |
| H  | -3.11741 | -2.07761 | 2.13175  |
| H  | -3.40442 | -0.46273 | 1.48471  |
| C  | 0.58929  | 0.48247  | 2.74903  |
| C  | -1.67472 | -0.62947 | 3.91043  |
| C  | -0.40010 | -0.07155 | 1.90850  |
| C  | 0.42918  | 0.50258  | 4.13115  |
| C  | -0.69999 | -0.05435 | 4.71342  |
| C  | -1.53573 | -0.63836 | 2.52628  |
| H  | 1.19985  | 0.94729  | 4.75832  |
| H  | -0.82001 | -0.04228 | 5.79270  |
| H  | -2.56187 | -1.06550 | 4.36625  |
| C  | 0.54080  | 3.19694  | 0.60761  |
| H  | -0.45899 | 2.87801  | 0.92700  |
| C  | 0.38323  | 3.94324  | -0.71243 |
| H  | 1.30591  | 4.47098  | -0.98179 |
| H  | -0.41004 | 4.69397  | -0.61500 |
| H  | 0.10305  | 3.27955  | -1.53573 |
| C  | 1.10621  | 4.10112  | 1.69392  |
| H  | 2.14458  | 4.39143  | 1.50169  |
| H  | 1.05404  | 3.64247  | 2.68616  |
| H  | 0.51392  | 5.02309  | 1.73316  |
| C  | 3.04722  | 1.78390  | -0.43400 |
| H  | 3.43621  | 0.75774  | -0.38057 |
| C  | 4.04294  | 2.69062  | 0.27416  |
| H  | 5.02594  | 2.59685  | -0.20487 |
| H  | 4.16925  | 2.43682  | 1.33178  |
| H  | 3.75007  | 3.74425  | 0.20709  |
| C  | -1.54382 | -3.44681 | 0.05100  |
| H  | -0.94753 | -3.61526 | -0.85589 |
| C  | -0.65295 | -3.74279 | 1.25431  |
| H  | -0.27070 | -4.76804 | 1.18348  |
| H  | -1.21248 | -3.66654 | 2.19448  |
| H  | 0.20166  | -3.06371 | 1.33190  |
| C  | -2.74020 | -4.38719 | 0.05345  |
| H  | -2.39536 | -5.41521 | 0.21820  |
| H  | -3.28431 | -4.37598 | -0.89312 |
| H  | -3.44872 | -4.15266 | 0.85724  |
| C  | -3.32695 | -1.30630 | -1.18450 |
| H  | -3.42657 | -0.21538 | -1.09119 |
| C  | -2.90347 | -1.60647 | -2.61495 |
| H  | -2.66537 | -2.66829 | -2.76010 |

|   |          |          |          |
|---|----------|----------|----------|
| H | -2.03217 | -1.00767 | -2.89659 |
| H | -3.71892 | -1.35709 | -3.30367 |
| C | -4.68393 | -1.90842 | -0.84030 |
| H | -4.74273 | -2.97285 | -1.08030 |
| H | -5.45587 | -1.40117 | -1.43017 |
| H | -4.95021 | -1.78346 | 0.21441  |
| O | -1.04845 | 1.02671  | -1.56306 |
| C | -2.09036 | 1.79530  | -1.30764 |
| C | -4.31323 | 3.51071  | -0.98224 |
| C | -2.63502 | 2.04642  | -0.03713 |
| C | -2.70302 | 2.41974  | -2.41243 |
| C | -3.78690 | 3.26079  | -2.24648 |
| C | -3.72611 | 2.89302  | 0.11173  |
| H | -2.18410 | 1.56970  | 0.82895  |
| H | -2.28762 | 2.22080  | -3.39684 |
| H | -4.23206 | 3.72949  | -3.12062 |
| H | -4.12008 | 3.07070  | 1.10963  |
| H | -5.16501 | 4.17108  | -0.85658 |
| C | 0.83778  | -1.06372 | -1.92835 |
| H | 0.15580  | -1.63200 | -2.56353 |
| H | 1.38865  | -0.32073 | -2.50312 |
| C | 1.64300  | -1.92801 | -1.04250 |
| H | 1.24133  | -1.67011 | 0.05668  |
| O | 1.36843  | -3.29454 | -1.24939 |
| H | 1.87560  | -3.80484 | -0.60924 |
| C | 3.12628  | -1.67841 | -0.91858 |
| C | 5.86910  | -1.24445 | -0.64909 |
| C | 3.74270  | -1.78427 | 0.32590  |
| C | 3.90538  | -1.39009 | -2.03500 |
| C | 5.26779  | -1.16733 | -1.89915 |
| C | 5.10578  | -1.56437 | 0.46537  |
| H | 3.13428  | -2.01323 | 1.20174  |
| H | 3.43202  | -1.32597 | -3.01075 |
| H | 5.86505  | -0.92928 | -2.77424 |
| H | 5.57054  | -1.63527 | 1.44399  |
| H | 6.93416  | -1.06195 | -0.54523 |
| C | 2.92241  | 2.14679  | -1.90902 |
| H | 3.86043  | 1.91499  | -2.42773 |
| H | 2.72936  | 3.21511  | -2.04353 |
| H | 2.11399  | 1.60190  | -2.40657 |

# B4i

EE = -2262.269025

EE + ZPE = -2261.521887

G° = -2261.594503

|    |          |          |          |
|----|----------|----------|----------|
| Ir | 0.44371  | -0.03810 | -0.72789 |
| P  | -0.58437 | -0.91481 | 1.33885  |
| P  | 2.55590  | 0.79412  | -0.50957 |
| C  | -0.37222 | -2.71253 | 0.92912  |
| H  | -1.20782 | -2.96767 | 0.26669  |
| H  | -0.45072 | -3.36588 | 1.80378  |
| C  | 3.47762  | -0.57996 | -1.35786 |
| H  | 3.33516  | -0.41781 | -2.43399 |
| H  | 4.55636  | -0.54692 | -1.16057 |
| C  | 0.95955  | -2.87146 | 0.24431  |
| C  | 3.57159  | -3.02388 | -0.71380 |
| C  | 1.71261  | -4.03261 | 0.41375  |
| C  | 1.49013  | -1.77607 | -0.47088 |
| C  | 2.83767  | -1.85642 | -0.88433 |
| C  | 3.00181  | -4.12578 | -0.09036 |
| H  | 1.28809  | -4.86619 | 0.97096  |
| H  | 3.57737  | -5.03632 | 0.04563  |

|   |          |          |          |
|---|----------|----------|----------|
| H | 4.61005  | -3.06040 | -1.03878 |
| C | -2.39744 | -0.80792 | 1.76447  |
| H | -2.84234 | -1.15460 | 0.82371  |
| C | -2.90821 | 0.60950  | 1.99702  |
| H | -2.58914 | 1.30450  | 1.21427  |
| H | -2.57859 | 1.01978  | 2.95635  |
| H | -4.00482 | 0.59620  | 2.00477  |
| C | -2.86671 | -1.75463 | 2.86076  |
| H | -2.56624 | -2.79233 | 2.68266  |
| H | -3.96295 | -1.73659 | 2.90747  |
| H | -2.49786 | -1.45632 | 3.84867  |
| C | 0.40074  | -0.71876 | 2.92675  |
| H | 1.39207  | -0.46652 | 2.53470  |
| C | -0.07484 | 0.45198  | 3.77847  |
| H | 0.67612  | 0.67989  | 4.54503  |
| H | -1.00470 | 0.20973  | 4.30399  |
| H | -0.24814 | 1.36264  | 3.19537  |
| C | 0.56373  | -1.97243 | 3.77547  |
| H | 1.08756  | -2.77021 | 3.23958  |
| H | -0.39534 | -2.36615 | 4.12873  |
| H | 1.16194  | -1.73093 | 4.66282  |
| C | 3.57110  | 1.05373  | 1.05029  |
| H | 4.45263  | 1.59284  | 0.66378  |
| C | 2.90275  | 1.92303  | 2.10896  |
| H | 2.07955  | 1.39274  | 2.59416  |
| H | 2.50012  | 2.86112  | 1.72161  |
| H | 3.63304  | 2.16815  | 2.88892  |
| C | 4.06028  | -0.25265 | 1.66959  |
| H | 4.75506  | -0.79413 | 1.02338  |
| H | 3.24094  | -0.94224 | 1.90312  |
| H | 4.58434  | -0.03281 | 2.60710  |
| C | 3.00886  | 2.29870  | -1.52224 |
| H | 4.09736  | 2.18112  | -1.66108 |
| C | 2.74343  | 3.62173  | -0.81470 |
| H | 2.97145  | 4.44685  | -1.49834 |
| H | 3.36271  | 3.76178  | 0.07477  |
| H | 1.68946  | 3.71734  | -0.52625 |
| C | 2.33440  | 2.31013  | -2.88596 |
| H | 2.70804  | 3.16372  | -3.46342 |
| H | 1.24955  | 2.41822  | -2.77316 |
| H | 2.53119  | 1.40809  | -3.47314 |
| O | -0.74727 | 1.73387  | -1.17255 |
| C | -1.05056 | 2.70949  | -0.35914 |
| C | -1.82049 | 4.82269  | 1.37420  |
| C | -2.07306 | 3.61956  | -0.70920 |
| C | -0.42289 | 2.91708  | 0.88406  |
| C | -0.79917 | 3.95167  | 1.72711  |
| C | -2.44762 | 4.64172  | 0.14355  |
| H | -2.55992 | 3.49010  | -1.67356 |
| H | 0.35595  | 2.21819  | 1.17258  |
| H | -0.28551 | 4.06990  | 2.68073  |
| H | -3.24556 | 5.31668  | -0.15732 |
| H | -2.11975 | 5.62863  | 2.03621  |
| C | -1.70755 | -1.58993 | -2.03264 |
| C | -3.05654 | -1.24480 | -1.57789 |
| C | -5.62516 | -0.61327 | -0.69556 |
| C | -3.45784 | 0.09173  | -1.47147 |
| C | -3.96042 | -2.25867 | -1.24692 |
| C | -5.23692 | -1.94090 | -0.80927 |
| C | -4.73111 | 0.39872  | -1.02808 |
| H | -2.74334 | 0.88714  | -1.67240 |
| H | -3.65285 | -3.29526 | -1.33086 |

|   |          |          |          |
|---|----------|----------|----------|
| H | -5.93196 | -2.73563 | -0.55633 |
| H | -5.01970 | 1.44059  | -0.92341 |
| H | -6.62320 | -0.36575 | -0.34690 |
| C | -0.80958 | -0.72474 | -2.60590 |
| H | -1.13752 | 0.26739  | -2.89336 |
| H | -0.03955 | -1.17249 | -3.22859 |
| O | -1.43772 | -2.90592 | -1.95496 |
| H | -0.50677 | -3.05587 | -2.16523 |
| H | 1.15221  | 0.26174  | -2.12639 |

# B4ii

EE = -2262.287455

EE + ZPE = -2261.541456

G° = -2261.614312

|    |          |          |          |
|----|----------|----------|----------|
| Ir | 0.08261  | -0.24907 | 0.01158  |
| P  | 2.30911  | -1.02214 | 0.27096  |
| P  | -1.83569 | 0.63075  | -1.06446 |
| C  | 0.61163  | -0.43160 | -1.99659 |
| C  | 1.32062  | -0.79926 | -4.68947 |
| C  | -0.36942 | -0.53771 | -2.99309 |
| C  | 1.95754  | -0.51972 | -2.37913 |
| C  | 2.30317  | -0.70256 | -3.71468 |
| C  | -0.01497 | -0.71534 | -4.32706 |
| H  | 3.35316  | -0.76430 | -3.99417 |
| H  | -0.79103 | -0.78631 | -5.08675 |
| H  | 1.59653  | -0.93910 | -5.73041 |
| C  | 3.00957  | -0.39591 | -1.31746 |
| H  | 3.20463  | 0.66587  | -1.12661 |
| H  | 3.95375  | -0.87996 | -1.59194 |
| C  | -1.80917 | -0.41651 | -2.58350 |
| H  | -2.44570 | -0.02909 | -3.38830 |
| H  | -2.21829 | -1.39206 | -2.27759 |
| C  | 3.32592  | -0.24336 | 1.62548  |
| H  | 2.77929  | 0.69472  | 1.79378  |
| C  | 3.31436  | -1.05953 | 2.91236  |
| H  | 3.74658  | -0.46392 | 3.72425  |
| H  | 3.92410  | -1.96639 | 2.82092  |
| H  | 2.30836  | -1.36391 | 3.21238  |
| C  | 4.74885  | 0.13285  | 1.22940  |
| H  | 5.23008  | 0.64479  | 2.07116  |
| H  | 4.77781  | 0.81618  | 0.37683  |
| H  | 5.36286  | -0.74058 | 0.98470  |
| C  | 2.66497  | -2.85052 | 0.29647  |
| H  | 2.33979  | -3.16402 | 1.29777  |
| C  | 1.82656  | -3.58440 | -0.74290 |
| H  | 0.75670  | -3.39186 | -0.61973 |
| H  | 1.99853  | -4.66436 | -0.66492 |
| H  | 2.09420  | -3.27755 | -1.76127 |
| C  | 4.13634  | -3.20696 | 0.12773  |
| H  | 4.77316  | -2.77631 | 0.90439  |
| H  | 4.51926  | -2.88133 | -0.84630 |
| H  | 4.25906  | -4.29567 | 0.17030  |
| C  | -3.53566 | 0.41273  | -0.33520 |
| H  | -3.40215 | -0.49877 | 0.25660  |
| C  | -3.87154 | 1.53859  | 0.63393  |
| H  | -3.07546 | 1.70248  | 1.36928  |
| H  | -4.78328 | 1.29064  | 1.19009  |
| H  | -4.04888 | 2.48894  | 0.11887  |
| C  | -4.67482 | 0.13534  | -1.30782 |
| H  | -4.90319 | 0.98479  | -1.95774 |
| H  | -5.58198 | -0.09396 | -0.73426 |
| H  | -4.46994 | -0.73100 | -1.94424 |

|   |          |          |          |
|---|----------|----------|----------|
| C | -1.73924 | 2.38958  | -1.68776 |
| H | -1.74632 | 2.99333  | -0.76981 |
| C | -2.91862 | 2.80464  | -2.55948 |
| H | -2.75409 | 3.82735  | -2.91779 |
| H | -3.87648 | 2.79521  | -2.03390 |
| H | -3.00897 | 2.16882  | -3.44850 |
| C | -0.43057 | 2.67855  | -2.41831 |
| H | -0.37263 | 3.75488  | -2.61821 |
| H | -0.39094 | 2.15861  | -3.38311 |
| H | 0.44430  | 2.38869  | -1.83210 |
| O | 1.29279  | 1.61341  | 0.04321  |
| C | -0.27690 | 0.13675  | 2.20150  |
| H | -1.03547 | 0.90079  | 2.31889  |
| H | 0.66497  | 0.34253  | 2.70060  |
| C | -0.66658 | -1.17934 | 1.99097  |
| C | 1.23780  | 2.70115  | 0.76851  |
| C | 1.26207  | 5.12069  | 2.25654  |
| C | 0.06102  | 3.24323  | 1.32253  |
| C | 2.42994  | 3.42439  | 0.99822  |
| C | 2.43693  | 4.60311  | 1.72053  |
| C | 0.07924  | 4.42635  | 2.04621  |
| H | -0.87533 | 2.71368  | 1.17265  |
| H | 3.34825  | 3.02952  | 0.56718  |
| H | 3.37664  | 5.12992  | 1.86892  |
| H | -0.85282 | 4.81222  | 2.45318  |
| H | 1.27023  | 6.04515  | 2.82470  |
| C | -2.09181 | -1.62572 | 1.96737  |
| C | -4.75248 | -2.49835 | 2.00724  |
| C | -2.50154 | -2.71200 | 1.18975  |
| C | -3.03043 | -1.01084 | 2.79144  |
| C | -4.35241 | -1.43731 | 2.80429  |
| C | -3.81739 | -3.14296 | 1.20544  |
| H | -1.78994 | -3.19691 | 0.52395  |
| H | -2.72007 | -0.18927 | 3.43008  |
| H | -5.07052 | -0.93878 | 3.44850  |
| H | -4.11834 | -3.97908 | 0.58183  |
| H | -5.78567 | -2.83093 | 2.01610  |
| O | 0.20359  | -2.16990 | 2.40021  |
| H | -0.10187 | -3.01521 | 2.05722  |
| H | -0.53441 | -1.66632 | -0.32482 |

### TSB3

EE = -2262.231597

EE + ZPE = -2261.488302

G° = -2261.559694

Imaginary Freq = -1331.35

|    |          |          |          |
|----|----------|----------|----------|
| Ir | 0.02473  | -0.14865 | -0.58452 |
| P  | -1.14291 | -0.72712 | 1.44853  |
| P  | 2.39418  | -0.53026 | -0.60456 |
| C  | -1.90518 | -2.29580 | 0.83702  |
| H  | -2.73124 | -1.98159 | 0.18629  |
| H  | -2.31667 | -2.93630 | 1.62315  |
| C  | 2.30719  | -1.98249 | -1.75982 |
| H  | 2.12093  | -1.55843 | -2.75502 |
| H  | 3.25760  | -2.53040 | -1.80717 |
| C  | -0.84495 | -2.98839 | 0.03002  |
| C  | 1.23387  | -4.23064 | -1.33927 |
| C  | -0.75141 | -4.37681 | -0.00627 |
| C  | 0.09971  | -2.19310 | -0.65411 |
| C  | 1.17172  | -2.84127 | -1.29163 |
| C  | 0.26689  | -5.00142 | -0.71233 |
| H  | -1.48555 | -4.97310 | 0.53205  |

|   |          |          |          |
|---|----------|----------|----------|
| H | 0.32562  | -6.08494 | -0.74344 |
| H | 2.07272  | -4.71072 | -1.83987 |
| C | -2.58731 | 0.35251  | 1.88205  |
| H | -3.15608 | 0.30618  | 0.94167  |
| C | -2.19190 | 1.80995  | 2.08449  |
| H | -1.58161 | 2.18155  | 1.25456  |
| H | -1.63613 | 1.96582  | 3.01513  |
| H | -3.09626 | 2.42765  | 2.13054  |
| C | -3.48324 | -0.16548 | 2.99693  |
| H | -3.80173 | -1.20021 | 2.83067  |
| H | -4.38907 | 0.45007  | 3.05219  |
| H | -2.99603 | -0.11099 | 3.97697  |
| C | -0.22778 | -1.23340 | 3.00877  |
| H | 0.73259  | -1.57743 | 2.60049  |
| C | 0.05219  | -0.05685 | 3.93646  |
| H | 0.77891  | -0.35492 | 4.70158  |
| H | -0.85476 | 0.26340  | 4.46047  |
| H | 0.45952  | 0.81666  | 3.41674  |
| C | -0.83687 | -2.39653 | 3.78030  |
| H | -0.86775 | -3.31412 | 3.18502  |
| H | -1.85179 | -2.17812 | 4.12910  |
| H | -0.22547 | -2.60543 | 4.66656  |
| C | 3.47893  | -1.16669 | 0.79263  |
| H | 4.49890  | -1.14415 | 0.37518  |
| C | 3.42236  | -0.25952 | 2.01486  |
| H | 2.43302  | -0.30619 | 2.48354  |
| H | 3.62360  | 0.79009  | 1.78741  |
| H | 4.15437  | -0.59287 | 2.75983  |
| C | 3.16357  | -2.60280 | 1.19225  |
| H | 3.37484  | -3.32184 | 0.39704  |
| H | 2.11128  | -2.73291 | 1.47229  |
| H | 3.77320  | -2.87981 | 2.06059  |
| C | 3.60867  | 0.55132  | -1.54430 |
| H | 4.35732  | -0.17736 | -1.89788 |
| C | 4.32074  | 1.59945  | -0.70004 |
| H | 4.98803  | 2.18698  | -1.34092 |
| H | 4.93560  | 1.16028  | 0.09013  |
| H | 3.61210  | 2.29756  | -0.23987 |
| C | 2.96673  | 1.21085  | -2.75739 |
| H | 3.74488  | 1.67042  | -3.37759 |
| H | 2.28138  | 2.01271  | -2.45557 |
| H | 2.41109  | 0.51216  | -3.39005 |
| O | 0.20561  | 2.16841  | -0.81321 |
| C | 0.94163  | 2.93816  | -0.01042 |
| C | 2.44354  | 4.64791  | 1.64211  |
| C | 1.30879  | 4.22022  | -0.44616 |
| C | 1.35454  | 2.53290  | 1.26085  |
| C | 2.08859  | 3.37931  | 2.07856  |
| C | 2.04605  | 5.05795  | 0.37308  |
| H | 0.99075  | 4.53704  | -1.43579 |
| H | 1.09485  | 1.52610  | 1.57355  |
| H | 2.39259  | 3.03352  | 3.06490  |
| H | 2.31665  | 6.04804  | 0.01633  |
| H | 3.02217  | 5.30972  | 2.27826  |
| C | -1.85116 | -0.22906 | -1.89800 |
| C | -2.94594 | 0.72204  | -1.58730 |
| C | -5.05579 | 2.46008  | -0.93667 |
| C | -2.73812 | 2.10287  | -1.50249 |
| C | -4.23969 | 0.23617  | -1.36665 |
| C | -5.27915 | 1.09577  | -1.04000 |
| C | -3.78002 | 2.95508  | -1.17820 |
| H | -1.74219 | 2.50784  | -1.64156 |

|   |          |          |          |
|---|----------|----------|----------|
| H | -4.42570 | -0.82790 | -1.45745 |
| H | -6.27366 | 0.69177  | -0.87246 |
| H | -3.58958 | 4.02227  | -1.10747 |
| H | -5.86804 | 3.13371  | -0.68085 |
| C | -0.66699 | 0.11317  | -2.61803 |
| H | -0.55680 | 1.13615  | -2.97332 |
| H | -0.29107 | -0.63452 | -3.31716 |
| O | -2.36905 | -1.50160 | -2.08245 |
| H | -1.63712 | -2.12664 | -2.13903 |
| H | 0.80272  | 1.05294  | -1.44393 |

# **Reaction between (PCP)Ir and 1 along path C C2**

EE = -2261.058276

EE + ZPE = -2260.331642

G° = -2260.407294

|    |          |          |          |
|----|----------|----------|----------|
| Ir | 0.11513  | -0.16880 | -0.29552 |
| P  | 0.90970  | -2.42993 | -0.28032 |
| P  | -0.29560 | 1.08076  | 1.56418  |
| C  | 2.64221  | -2.00710 | -0.79475 |
| H  | 2.55803  | -1.81020 | -1.87331 |
| H  | 3.36692  | -2.81917 | -0.65410 |
| C  | 1.21904  | 2.14608  | 1.52591  |
| H  | 1.02281  | 2.91462  | 0.76274  |
| H  | 1.43159  | 2.65714  | 2.47278  |
| C  | 2.01166  | 0.14402  | 0.29260  |
| C  | 4.66939  | 0.62609  | 1.04947  |
| C  | 3.03104  | -0.75540 | -0.06410 |
| C  | 2.34111  | 1.25503  | 1.08704  |
| C  | 3.66122  | 1.48981  | 1.45351  |
| C  | 4.34751  | -0.49973 | 0.30467  |
| H  | 3.89915  | 2.35855  | 2.06421  |
| H  | 5.12724  | -1.20290 | 0.01704  |
| H  | 5.69933  | 0.81537  | 1.33632  |
| O  | 0.47126  | 0.01241  | -2.40593 |
| C  | -0.10650 | 1.12009  | -1.96259 |
| C  | 0.63793  | 2.40152  | -1.98783 |
| C  | 2.16963  | 4.75200  | -1.88142 |
| C  | 2.01721  | 2.37074  | -2.21399 |
| C  | 0.03875  | 3.64062  | -1.73797 |
| C  | 0.79691  | 4.80180  | -1.68479 |
| C  | 2.77216  | 3.52885  | -2.15135 |
| H  | 2.48237  | 1.41145  | -2.41826 |
| H  | -1.03339 | 3.71175  | -1.57082 |
| H  | 0.30848  | 5.75244  | -1.48916 |
| H  | 3.84504  | 3.47654  | -2.31329 |
| H  | 2.76371  | 5.65944  | -1.83450 |
| C  | -1.61064 | 1.10227  | -2.15639 |
| H  | -1.90319 | 0.99380  | -3.21006 |
| H  | -2.11818 | 1.97064  | -1.71836 |
| O  | -2.00013 | -0.07938 | -1.42749 |
| C  | -3.28760 | -0.26478 | -1.03407 |
| C  | -5.86061 | -0.76079 | -0.10466 |
| C  | -3.50198 | -1.23867 | -0.06141 |
| C  | -4.35563 | 0.46119  | -1.54617 |
| C  | -5.63730 | 0.20681  | -1.07025 |
| C  | -4.78383 | -1.48656 | 0.39371  |
| H  | -2.63646 | -1.75551 | 0.34752  |
| H  | -4.20007 | 1.21095  | -2.31367 |
| H  | -6.47025 | 0.77710  | -1.47000 |
| H  | -4.94233 | -2.24332 | 1.15607  |
| H  | -6.86500 | -0.95049 | 0.25866  |

|   |          |          |          |
|---|----------|----------|----------|
| C | 0.22125  | -3.36803 | -1.73513 |
| H | 0.02932  | -2.53387 | -2.42819 |
| C | 1.15090  | -4.35326 | -2.43216 |
| H | 2.11880  | -3.91107 | -2.68464 |
| H | 0.69049  | -4.68073 | -3.37214 |
| H | 1.33502  | -5.25015 | -1.83384 |
| C | -1.11311 | -4.01124 | -1.38784 |
| H | -1.57257 | -4.43768 | -2.28672 |
| H | -1.82081 | -3.28645 | -0.97271 |
| H | -0.99685 | -4.82855 | -0.66529 |
| C | 1.06843  | -3.60250 | 1.16472  |
| H | 0.02946  | -3.73597 | 1.50511  |
| C | 1.66751  | -4.96708 | 0.85716  |
| H | 2.65237  | -4.87634 | 0.38312  |
| H | 1.03176  | -5.57116 | 0.20521  |
| H | 1.80986  | -5.52878 | 1.78867  |
| C | 1.85579  | -2.92042 | 2.27659  |
| H | 2.91318  | -2.81787 | 2.00498  |
| H | 1.80510  | -3.51730 | 3.19462  |
| H | 1.47788  | -1.91829 | 2.49661  |
| C | -0.20995 | 0.29037  | 3.25535  |
| H | 0.83021  | -0.07461 | 3.23782  |
| C | -1.13067 | -0.91616 | 3.36813  |
| H | -1.04127 | -1.56423 | 2.48897  |
| H | -2.18081 | -0.61498 | 3.45837  |
| H | -0.87955 | -1.50665 | 4.25776  |
| C | -0.35459 | 1.21775  | 4.45287  |
| H | 0.31233  | 2.08393  | 4.39888  |
| H | -0.10928 | 0.67590  | 5.37434  |
| H | -1.38119 | 1.58406  | 4.56200  |
| C | -1.71953 | 2.29720  | 1.53486  |
| H | -1.80729 | 2.49398  | 0.45533  |
| C | -3.03167 | 1.68501  | 2.00614  |
| H | -3.23024 | 0.71098  | 1.54935  |
| H | -3.86775 | 2.34511  | 1.74597  |
| H | -3.04635 | 1.56089  | 3.09479  |
| C | -1.45894 | 3.63000  | 2.22561  |
| H | -0.58624 | 4.14895  | 1.81895  |
| H | -1.31424 | 3.51307  | 3.30422  |
| H | -2.32558 | 4.28771  | 2.08469  |

## **TSC1/t**

EE = -2260.973791

EE + ZPE = -2260.249783

G° = -2260.323020

Imaginary Freq = -330.85

|    |           |           |           |
|----|-----------|-----------|-----------|
| Ir | 0.114687  | -0.620878 | 0.431001  |
| P  | 2.376287  | -0.614914 | 0.868772  |
| P  | -1.625116 | -0.907643 | -1.177649 |
| C  | 2.908580  | -2.349739 | 0.638548  |
| H  | 2.805158  | -2.828006 | 1.622948  |
| H  | 3.958081  | -2.457122 | 0.336614  |
| C  | -1.663167 | -2.730922 | -1.343265 |
| H  | -2.231105 | -3.096908 | -0.474803 |
| H  | -2.172618 | -3.083863 | -2.247224 |
| C  | 0.659862  | -2.406893 | -0.491697 |
| C  | 1.435102  | -4.836118 | -1.784350 |
| C  | 1.946615  | -2.979521 | -0.323703 |
| C  | -0.240799 | -3.180569 | -1.261832 |
| C  | 0.144420  | -4.349884 | -1.907527 |
| C  | 2.321608  | -4.153657 | -0.968680 |
| H  | -0.586880 | -4.890817 | -2.505113 |

|   |           |           |           |
|---|-----------|-----------|-----------|
| H | 3.327595  | -4.540840 | -0.816871 |
| H | 1.738345  | -5.743918 | -2.296585 |
| O | 0.037629  | 0.590627  | 2.145567  |
| C | -1.017676 | 0.981223  | 1.500948  |
| C | -2.345966 | 0.590412  | 2.058824  |
| C | -4.801961 | -0.222791 | 3.138514  |
| C | -2.458314 | -0.619484 | 2.752222  |
| C | -3.477146 | 1.398701  | 1.952943  |
| C | -4.695877 | 0.993817  | 2.486332  |
| C | -3.672159 | -1.025046 | 3.274530  |
| H | -1.573568 | -1.241681 | 2.850556  |
| H | -3.426009 | 2.360074  | 1.450161  |
| H | -5.563808 | 1.639978  | 2.391690  |
| H | -3.741609 | -1.974489 | 3.797221  |
| H | -5.754145 | -0.543009 | 3.550019  |
| C | -0.909626 | 2.341959  | 0.853328  |
| H | -0.906673 | 3.102679  | 1.654485  |
| H | -1.762781 | 2.555769  | 0.195020  |
| O | 0.285121  | 2.411266  | 0.112244  |
| C | 0.538077  | 3.578981  | -0.536563 |
| C | 1.219224  | 5.886124  | -1.959218 |
| C | 1.614179  | 3.570569  | -1.426337 |
| C | -0.206379 | 4.745584  | -0.378180 |
| C | 0.144524  | 5.888858  | -1.088115 |
| C | 1.949850  | 4.714447  | -2.125040 |
| H | 2.164024  | 2.645748  | -1.569710 |
| H | -1.051962 | 4.782998  | 0.297817  |
| H | -0.440881 | 6.793025  | -0.949921 |
| H | 2.788881  | 4.689274  | -2.813857 |
| H | 1.484600  | 6.782625  | -2.509426 |
| C | 2.922690  | -0.088366 | 2.567657  |
| H | 2.080643  | -0.430344 | 3.184819  |
| C | 4.197335  | -0.745497 | 3.081945  |
| H | 4.134737  | -1.837462 | 3.092316  |
| H | 4.379364  | -0.421987 | 4.113836  |
| H | 5.078967  | -0.466958 | 2.496256  |
| C | 2.984376  | 1.430645  | 2.681808  |
| H | 3.106779  | 1.715101  | 3.733103  |
| H | 2.067562  | 1.895652  | 2.310948  |
| H | 3.837978  | 1.846035  | 2.133587  |
| C | 3.364893  | 0.385261  | -0.350605 |
| H | 3.025783  | 1.414314  | -0.166370 |
| C | 4.874262  | 0.320007  | -0.157256 |
| H | 5.248071  | -0.709076 | -0.219624 |
| H | 5.202890  | 0.743477  | 0.794649  |
| H | 5.369936  | 0.887240  | -0.954077 |
| C | 2.996388  | -0.007100 | -1.775288 |
| H | 3.297936  | -1.038649 | -1.995200 |
| H | 3.513002  | 0.646660  | -2.489310 |
| H | 1.918058  | 0.063748  | -1.942756 |
| C | -1.035940 | -0.360015 | -2.860813 |
| H | -0.114863 | -0.958541 | -2.940309 |
| C | -0.636495 | 1.108420  | -2.877897 |
| H | -0.023712 | 1.352773  | -2.006362 |
| H | -1.508376 | 1.773413  | -2.874662 |
| H | -0.059547 | 1.336288  | -3.782586 |
| C | -1.929542 | -0.718640 | -4.038471 |
| H | -2.181911 | -1.783206 | -4.070971 |
| H | -1.409688 | -0.481559 | -4.974437 |
| H | -2.862100 | -0.144118 | -4.037389 |
| C | -3.431093 | -0.454204 | -0.978810 |
| H | -3.579474 | -0.543253 | 0.106402  |

|   |           |           |           |
|---|-----------|-----------|-----------|
| C | -3.741393 | 0.980506  | -1.382355 |
| H | -3.015555 | 1.700177  | -0.996348 |
| H | -4.728084 | 1.267186  | -0.999605 |
| H | -3.768417 | 1.091897  | -2.471886 |
| C | -4.408919 | -1.406101 | -1.659786 |
| H | -4.315282 | -2.434492 | -1.303175 |
| H | -4.293777 | -1.410956 | -2.748842 |
| H | -5.433232 | -1.079837 | -1.442263 |

### C3

EE = -2261.059564

EE + ZPE = -2261.059564

G° = -2260.408300

|    |          |          |          |
|----|----------|----------|----------|
| Ir | 0.11700  | -0.16558 | -0.29278 |
| P  | 0.98779  | -2.40011 | -0.28639 |
| P  | -0.31294 | 1.05818  | 1.57727  |
| C  | 2.69719  | -1.91676 | -0.82342 |
| H  | 2.59108  | -1.72017 | -1.90010 |
| H  | 3.45108  | -2.70375 | -0.69484 |
| C  | 1.15890  | 2.18144  | 1.52062  |
| H  | 0.92622  | 2.94284  | 0.76066  |
| H  | 1.36473  | 2.69922  | 2.46528  |
| C  | 2.00774  | 0.21069  | 0.27324  |
| C  | 4.65434  | 0.78147  | 1.00344  |
| C  | 3.05261  | -0.65337 | -0.09565 |
| C  | 2.30657  | 1.33094  | 1.06670  |
| C  | 3.62173  | 1.60970  | 1.41994  |
| C  | 4.36336  | -0.35353 | 0.25977  |
| H  | 3.83630  | 2.48497  | 2.02988  |
| H  | 5.16342  | -1.02961 | -0.03662 |
| H  | 5.68019  | 1.00515  | 1.28000  |
| O  | 0.44304  | 0.02710  | -2.40350 |
| C  | -0.15877 | 1.11996  | -1.95216 |
| C  | 0.55145  | 2.42048  | -1.98282 |
| C  | 2.02086  | 4.81153  | -1.88664 |
| C  | 1.92833  | 2.42809  | -2.22579 |
| C  | -0.07730 | 3.64252  | -1.72041 |
| C  | 0.64993  | 4.82340  | -1.67221 |
| C  | 2.65247  | 3.60605  | -2.16860 |
| H  | 2.41739  | 1.48255  | -2.43829 |
| H  | -1.14841 | 3.68440  | -1.53846 |
| H  | 0.13881  | 5.75985  | -1.46649 |
| H  | 3.72423  | 3.58322  | -2.34428 |
| H  | 2.59085  | 5.73449  | -1.84385 |
| C  | -1.66319 | 1.06612  | -2.13449 |
| H  | -1.95962 | 0.94274  | -3.18524 |
| H  | -2.18589 | 1.92689  | -1.69971 |
| O  | -2.02183 | -0.11813 | -1.39484 |
| C  | -3.30705 | -0.34418 | -1.01808 |
| C  | -5.87296 | -0.92413 | -0.11781 |
| C  | -3.50291 | -1.34150 | -0.06545 |
| C  | -4.38985 | 0.36384  | -1.52445 |
| C  | -5.66801 | 0.06648  | -1.06372 |
| C  | -4.78101 | -1.63045 | 0.37559  |
| H  | -2.62788 | -1.84536 | 0.33891  |
| H  | -4.24990 | 1.13105  | -2.27738 |
| H  | -6.51265 | 0.62193  | -1.45990 |
| H  | -4.92532 | -2.40574 | 1.12193  |
| H  | -6.87463 | -1.14681 | 0.23406  |
| C  | 0.31646  | -3.35866 | -1.73591 |
| H  | 0.09459  | -2.52981 | -2.42648 |
| C  | 1.26879  | -4.31543 | -2.44199 |

|   |          |          |          |
|---|----------|----------|----------|
| H | 2.22441  | -3.84721 | -2.69463 |
| H | 0.81366  | -4.64850 | -3.38255 |
| H | 1.47748  | -5.21126 | -1.85017 |
| C | -0.99580 | -4.04068 | -1.37925 |
| H | -1.44957 | -4.47969 | -2.27495 |
| H | -1.72065 | -3.33639 | -0.95852 |
| H | -0.85064 | -4.85455 | -0.65811 |
| C | 1.20877  | -3.56833 | 1.15465  |
| H | 0.18047  | -3.73868 | 1.51050  |
| C | 1.85097  | -4.91053 | 0.83627  |
| H | 2.82381  | -4.78453 | 0.34590  |
| H | 1.22650  | -5.53715 | 0.19491  |
| H | 2.02887  | -5.46660 | 1.76504  |
| C | 1.98874  | -2.85979 | 2.25518  |
| H | 3.03707  | -2.71869 | 1.96637  |
| H | 1.97462  | -3.45964 | 3.17256  |
| H | 1.57875  | -1.87238 | 2.48417  |
| C | -0.17064 | 0.27398  | 3.26728  |
| H | 0.88576  | -0.04015 | 3.23905  |
| C | -1.03062 | -0.97527 | 3.39239  |
| H | -0.91980 | -1.62090 | 2.51377  |
| H | -2.09273 | -0.72467 | 3.49385  |
| H | -0.74148 | -1.55058 | 4.28043  |
| C | -0.34742 | 1.19619  | 4.46463  |
| H | 0.27363  | 2.09520  | 4.40139  |
| H | -0.06456 | 0.66975  | 5.38427  |
| H | -1.38982 | 1.51032  | 4.58493  |
| C | -1.78767 | 2.21148  | 1.56278  |
| H | -1.89979 | 2.39710  | 0.48335  |
| C | -3.06382 | 1.54289  | 2.05545  |
| H | -3.22228 | 0.55861  | 1.60471  |
| H | -3.93307 | 2.16178  | 1.80289  |
| H | -3.05829 | 1.42304  | 3.14479  |
| C | -1.57602 | 3.55870  | 2.24194  |
| H | -0.72791 | 4.10909  | 1.82451  |
| H | -1.41811 | 3.45570  | 3.32005  |
| H | -2.46956 | 4.17995  | 2.10383  |

# TSC1

EE = -2261.014554

EE + ZPE = -2260.291273

G° = -2260.364655

Imaginary Freq = -397.18

|    |          |          |          |
|----|----------|----------|----------|
| Ir | 0.23927  | -0.24193 | 0.08770  |
| P  | 2.39323  | -1.10690 | 0.00193  |
| P  | -1.61111 | 0.86856  | 0.97504  |
| C  | 3.40807  | 0.42171  | 0.04804  |
| H  | 3.55308  | 0.68954  | -1.00967 |
| H  | 4.40074  | 0.28265  | 0.49458  |
| C  | -0.99757 | 2.60017  | 1.07597  |
| H  | -1.25036 | 3.08785  | 0.12367  |
| H  | -1.48241 | 3.17752  | 1.87306  |
| C  | 1.19419  | 1.41362  | 0.75823  |
| C  | 2.55685  | 3.69613  | 1.74040  |
| C  | 2.60825  | 1.50445  | 0.72375  |
| C  | 0.49628  | 2.54989  | 1.22781  |
| C  | 1.17144  | 3.65822  | 1.72735  |
| C  | 3.26701  | 2.62409  | 1.22018  |
| H  | 0.60073  | 4.51131  | 2.09023  |
| H  | 4.35444  | 2.66059  | 1.18554  |
| H  | 3.08025  | 4.56208  | 2.13451  |
| O  | 1.61102  | 0.40104  | -2.71853 |

|   |          |          |          |
|---|----------|----------|----------|
| C | 0.44065  | 0.54372  | -2.35360 |
| C | -0.13371 | 1.93379  | -2.27829 |
| C | -1.03428 | 4.58425  | -2.29363 |
| C | 0.74412  | 2.98705  | -2.01830 |
| C | -1.45860 | 2.23619  | -2.59167 |
| C | -1.90704 | 3.55101  | -2.59967 |
| C | 0.29595  | 4.29552  | -2.00739 |
| H | 1.78315  | 2.75534  | -1.80677 |
| H | -2.15576 | 1.44895  | -2.86424 |
| H | -2.94108 | 3.76502  | -2.85461 |
| H | 0.98924  | 5.09706  | -1.77038 |
| H | -1.38343 | 5.61235  | -2.29296 |
| C | -0.48942 | -0.61104 | -2.33205 |
| H | -0.20250 | -1.36048 | -3.06757 |
| H | -1.55356 | -0.40079 | -2.29193 |
| O | -0.51421 | -1.99887 | -1.05543 |
| C | -1.65931 | -2.67084 | -0.88007 |
| C | -3.97928 | -4.18349 | -0.43176 |
| C | -2.61711 | -2.82103 | -1.88885 |
| C | -1.87140 | -3.31354 | 0.34595  |
| C | -3.01362 | -4.06328 | 0.56196  |
| C | -3.76667 | -3.56401 | -1.65377 |
| H | -2.45654 | -2.37488 | -2.86447 |
| H | -1.10680 | -3.20938 | 1.11169  |
| H | -3.15384 | -4.55685 | 1.51991  |
| H | -4.50184 | -3.66525 | -2.44722 |
| H | -4.87883 | -4.76471 | -0.25822 |
| C | 2.96801  | -2.14678 | -1.42159 |
| H | 2.44905  | -1.65443 | -2.25497 |
| C | 4.46010  | -2.09986 | -1.72030 |
| H | 4.81133  | -1.07754 | -1.88961 |
| H | 4.66460  | -2.66716 | -2.63623 |
| H | 5.06753  | -2.54024 | -0.92358 |
| C | 2.44007  | -3.56957 | -1.28734 |
| H | 2.60604  | -4.11718 | -2.22211 |
| H | 1.36454  | -3.58014 | -1.07901 |
| H | 2.95344  | -4.12541 | -0.49374 |
| C | 2.77965  | -2.03861 | 1.57199  |
| H | 2.09636  | -2.90146 | 1.53280  |
| C | 4.21134  | -2.54118 | 1.69524  |
| H | 4.93326  | -1.71921 | 1.61486  |
| H | 4.46669  | -3.29083 | 0.94276  |
| H | 4.35858  | -3.00182 | 2.67948  |
| C | 2.41504  | -1.19549 | 2.78841  |
| H | 3.06796  | -0.31876 | 2.87513  |
| H | 2.53266  | -1.78966 | 3.70204  |
| H | 1.38455  | -0.82875 | 2.74308  |
| C | -1.75430 | 0.45741  | 2.79673  |
| H | -0.78273 | 0.83732  | 3.15266  |
| C | -1.79961 | -1.03683 | 3.07985  |
| H | -0.95446 | -1.55510 | 2.61516  |
| H | -2.71877 | -1.49974 | 2.70324  |
| H | -1.75748 | -1.21415 | 4.16129  |
| C | -2.84981 | 1.19035  | 3.55879  |
| H | -2.83780 | 2.27155  | 3.39109  |
| H | -2.71876 | 1.02737  | 4.63517  |
| H | -3.84542 | 0.81553  | 3.29762  |
| C | -3.31863 | 0.97008  | 0.22480  |
| H | -3.08275 | 0.99323  | -0.84999 |
| C | -4.12823 | -0.29119 | 0.49609  |
| H | -3.55757 | -1.20360 | 0.29784  |
| H | -5.01841 | -0.31298 | -0.14325 |

|   |          |          |          |
|---|----------|----------|----------|
| H | -4.47546 | -0.32770 | 1.53486  |
| C | -4.11511 | 2.22856  | 0.54149  |
| H | -3.56856 | 3.14338  | 0.29345  |
| H | -4.40182 | 2.27849  | 1.59620  |
| H | -5.04168 | 2.23072  | -0.04591 |

#### C4

EE = -2261.093894

EE + ZPE = -2260.368328

G° = -2260.441505

|    |          |          |          |
|----|----------|----------|----------|
| Ir | 0.34818  | -0.09612 | -0.15971 |
| P  | -0.81162 | 1.87596  | 0.40167  |
| P  | 1.32078  | -2.21746 | -0.08446 |
| C  | -2.25721 | 1.21463  | 1.33091  |
| H  | -3.08634 | 1.15190  | 0.60846  |
| H  | -2.58647 | 1.88671  | 2.13339  |
| C  | -0.00777 | -3.22101 | 0.69147  |
| H  | -0.60680 | -3.59901 | -0.14925 |
| H  | 0.36556  | -4.08629 | 1.24780  |
| C  | -0.96357 | -0.94401 | 1.15743  |
| C  | -2.49205 | -2.01830 | 3.28034  |
| C  | -1.94120 | -0.17100 | 1.82724  |
| C  | -0.85958 | -2.30799 | 1.52682  |
| C  | -1.59892 | -2.82200 | 2.58724  |
| C  | -2.67343 | -0.70165 | 2.88334  |
| H  | -1.48325 | -3.86857 | 2.86253  |
| H  | -3.40602 | -0.07797 | 3.39259  |
| H  | -3.06010 | -2.42238 | 4.11288  |
| O  | -1.57064 | -2.60471 | -1.87234 |
| C  | -1.72215 | -1.39777 | -1.80183 |
| C  | -3.07715 | -0.84776 | -1.47930 |
| C  | -5.62595 | 0.09104  | -0.85896 |
| C  | -3.85664 | -1.50380 | -0.52886 |
| C  | -3.59863 | 0.26382  | -2.13693 |
| C  | -4.87343 | 0.72562  | -1.83724 |
| C  | -5.11487 | -1.02479 | -0.20548 |
| H  | -3.44707 | -2.37728 | -0.02904 |
| H  | -3.01883 | 0.75431  | -2.91454 |
| H  | -5.27843 | 1.58153  | -2.36898 |
| H  | -5.70104 | -1.52385 | 0.56023  |
| H  | -6.61677 | 0.45985  | -0.61142 |
| C  | -0.59001 | -0.45199 | -1.99061 |
| H  | -0.88602 | 0.52672  | -2.37791 |
| H  | 0.17112  | -0.88412 | -2.64611 |
| O  | 1.80853  | 0.87264  | -1.45194 |
| C  | 2.65224  | 1.69000  | -0.87983 |
| C  | 4.38373  | 3.56531  | 0.36299  |
| C  | 3.19767  | 2.77963  | -1.59432 |
| C  | 3.04906  | 1.56247  | 0.46843  |
| C  | 3.88652  | 2.48589  | 1.07781  |
| C  | 4.03567  | 3.69102  | -0.98144 |
| H  | 2.92185  | 2.88630  | -2.64038 |
| H  | 2.68870  | 0.70120  | 1.03367  |
| H  | 4.15707  | 2.35223  | 2.12308  |
| H  | 4.42628  | 4.52413  | -1.56083 |
| H  | 5.04309  | 4.28701  | 0.83391  |
| C  | -1.49021 | 2.94729  | -0.94844 |
| H  | -1.91092 | 2.19119  | -1.62604 |
| C  | -2.62788 | 3.89038  | -0.58164 |
| H  | -3.42790 | 3.38703  | -0.02847 |
| H  | -3.07190 | 4.29323  | -1.50017 |
| H  | -2.28855 | 4.74246  | 0.01266  |

|   |          |          |          |
|---|----------|----------|----------|
| C | -0.34576 | 3.64077  | -1.67449 |
| H | -0.72382 | 4.17005  | -2.55647 |
| H | 0.41239  | 2.91948  | -1.99995 |
| H | 0.15232  | 4.38124  | -1.03702 |
| C | 0.12482  | 2.94163  | 1.60708  |
| H | 1.05272  | 3.19415  | 1.07251  |
| C | -0.57357 | 4.22292  | 2.03754  |
| H | -1.58058 | 4.03379  | 2.42949  |
| H | -0.65341 | 4.94903  | 1.22548  |
| H | 0.00149  | 4.69758  | 2.84125  |
| C | 0.49252  | 2.10689  | 2.82926  |
| H | -0.39239 | 1.86084  | 3.42858  |
| H | 1.18209  | 2.67254  | 3.46591  |
| H | 0.98380  | 1.16345  | 2.56836  |
| C | 2.70578  | -2.18134 | 1.17314  |
| H | 2.39673  | -1.35629 | 1.83556  |
| C | 4.04005  | -1.80744 | 0.53850  |
| H | 3.96338  | -0.95619 | -0.14438 |
| H | 4.46234  | -2.65558 | -0.01179 |
| H | 4.75892  | -1.53689 | 1.32023  |
| C | 2.83264  | -3.42836 | 2.03787  |
| H | 1.94260  | -3.59920 | 2.65055  |
| H | 3.68185  | -3.31037 | 2.72124  |
| H | 3.01733  | -4.32739 | 1.43963  |
| C | 1.80963  | -3.14578 | -1.60708 |
| H | 0.82887  | -3.21494 | -2.10278 |
| C | 2.74587  | -2.34628 | -2.50803 |
| H | 2.47828  | -1.28467 | -2.55457 |
| H | 2.71770  | -2.75739 | -3.52347 |
| H | 3.78281  | -2.40842 | -2.16330 |
| C | 2.31947  | -4.55753 | -1.35612 |
| H | 1.62825  | -5.15173 | -0.74926 |
| H | 3.29638  | -4.55314 | -0.85903 |
| H | 2.44773  | -5.07909 | -2.31184 |

#### C5

EE = -2262.285807

EE + ZPE = -2261.542802

G° = -2261.618813

|    |          |          |          |
|----|----------|----------|----------|
| Ir | 0.04503  | -0.02417 | -0.18384 |
| P  | -1.61033 | -1.66262 | 0.22743  |
| P  | 2.15521  | 0.83257  | -0.86647 |
| C  | -3.37304 | -1.25299 | 0.64309  |
| H  | -3.71223 | -0.76042 | -0.27862 |
| C  | -0.92648 | -2.94225 | 1.39224  |
| H  | 0.15121  | -2.83194 | 1.21489  |
| C  | -4.24811 | -2.48079 | 0.86349  |
| H  | -3.99200 | -3.00599 | 1.78973  |
| H  | -4.18269 | -3.19358 | 0.03541  |
| H  | -5.29654 | -2.17162 | 0.94503  |
| C  | -3.50573 | -0.25833 | 1.78950  |
| H  | -3.16348 | -0.67417 | 2.74243  |
| H  | -4.55899 | 0.02150  | 1.91029  |
| H  | -2.95156 | 0.66813  | 1.60025  |
| C  | -1.33198 | -4.37700 | 1.08413  |
| H  | -0.83655 | -5.04495 | 1.79867  |
| H  | -1.01997 | -4.68995 | 0.08329  |
| H  | -2.41001 | -4.54469 | 1.17901  |
| C  | -1.16928 | -2.59067 | 2.85378  |
| H  | -0.54520 | -3.23076 | 3.48761  |
| H  | -2.21180 | -2.75765 | 3.14965  |
| H  | -0.89887 | -1.55642 | 3.08769  |

|   |          |          |          |
|---|----------|----------|----------|
| C | 3.17754  | 1.74292  | 0.38709  |
| H | 3.20546  | 1.00394  | 1.20242  |
| C | 2.51941  | 2.99702  | 0.94477  |
| H | 3.07105  | 3.32975  | 1.83139  |
| H | 1.48820  | 2.81598  | 1.26487  |
| H | 2.52096  | 3.82169  | 0.22429  |
| C | 4.60953  | 2.01637  | -0.05365 |
| H | 5.18784  | 2.39075  | 0.79856  |
| H | 4.65661  | 2.78169  | -0.83653 |
| H | 5.11563  | 1.11820  | -0.42118 |
| C | 2.22703  | 1.66261  | -2.53287 |
| H | 1.38730  | 1.18874  | -3.05921 |
| C | 1.94793  | 3.15735  | -2.44045 |
| H | 2.80920  | 3.70000  | -2.03506 |
| H | 1.08150  | 3.39096  | -1.81208 |
| H | 1.74931  | 3.56248  | -3.43877 |
| C | 3.48440  | 1.38729  | -3.34704 |
| H | 4.39333  | 1.73882  | -2.84828 |
| H | 3.41407  | 1.91381  | -4.30618 |
| H | 3.60247  | 0.32328  | -3.57085 |
| C | 3.02498  | -0.76899 | -1.08847 |
| H | 3.25707  | -1.10077 | -0.06787 |
| H | 3.95986  | -0.68269 | -1.65065 |
| C | -1.64924 | -2.47044 | -1.42273 |
| H | -2.23534 | -1.79886 | -2.06535 |
| H | -2.14050 | -3.44937 | -1.41369 |
| C | 0.68753  | -1.58593 | -1.37746 |
| C | 1.56812  | -3.67571 | -3.03769 |
| C | 2.04549  | -1.72014 | -1.71041 |
| C | -0.21264 | -2.55438 | -1.85491 |
| C | 0.23392  | -3.58992 | -2.67142 |
| C | 2.47200  | -2.74370 | -2.55114 |
| H | -0.47698 | -4.33321 | -3.02687 |
| H | 3.52701  | -2.82185 | -2.80700 |
| H | 1.90566  | -4.47696 | -3.68796 |
| O | 1.26522  | -0.90570 | 1.38891  |
| C | 1.58966  | -0.38338 | 2.54878  |
| C | 2.46086  | 0.68587  | 5.02887  |
| C | 2.81528  | -0.76876 | 3.13582  |
| C | 0.80664  | 0.53818  | 3.27146  |
| C | 1.24108  | 1.05782  | 4.48270  |
| C | 3.23736  | -0.24304 | 4.34300  |
| H | 3.41892  | -1.49927 | 2.60161  |
| H | -0.16238 | 0.83573  | 2.88028  |
| H | 0.60685  | 1.76639  | 5.01011  |
| H | 4.19081  | -0.56215 | 4.75697  |
| H | 2.79555  | 1.09992  | 5.97427  |
| C | -0.93518 | 0.84838  | -1.90116 |
| H | -0.76955 | 0.18835  | -2.75947 |
| H | -0.45446 | 1.81117  | -2.09992 |
| C | -2.39175 | 1.03417  | -1.74707 |
| O | -3.20030 | 0.23023  | -2.19042 |
| C | -2.91439 | 2.21976  | -0.97990 |
| C | -4.00947 | 4.33272  | 0.48356  |
| C | -4.28436 | 2.27607  | -0.72511 |
| C | -2.10486 | 3.25348  | -0.50862 |
| C | -2.64703 | 4.30165  | 0.21927  |
| C | -4.82906 | 3.31917  | 0.00448  |
| H | -4.90604 | 1.47630  | -1.11613 |
| H | -1.03643 | 3.24220  | -0.70263 |
| H | -2.00418 | 5.09794  | 0.58173  |
| H | -5.89679 | 3.34581  | 0.19971  |

|   |          |         |         |
|---|----------|---------|---------|
| H | -4.43303 | 5.15116 | 1.05773 |
| H | -0.89970 | 1.08197 | 0.84796 |
| H | -0.15753 | 1.48993 | 0.74615 |

### TSC3i

EE = -2262.246488

EE + ZPE = -2261.505954

G° = -2261.580427

Imaginary Freq = -696.55

|    |          |          |          |
|----|----------|----------|----------|
| Ir | 0.13412  | -0.15737 | 0.05316  |
| P  | -1.19692 | 1.70031  | 0.65247  |
| P  | 1.96932  | -1.62992 | 0.13381  |
| C  | -2.97130 | 1.86159  | 0.12118  |
| H  | -3.43258 | 1.00335  | 0.63025  |
| C  | -0.27065 | 3.28968  | 0.37360  |
| H  | 0.76922  | 2.94385  | 0.44415  |
| C  | -3.67226 | 3.11668  | 0.62392  |
| H  | -3.28228 | 4.02018  | 0.14330  |
| H  | -3.58264 | 3.23926  | 1.70806  |
| H  | -4.74142 | 3.06050  | 0.38769  |
| C  | -3.15578 | 1.67002  | -1.37909 |
| H  | -2.80122 | 2.53697  | -1.94566 |
| H  | -4.22039 | 1.53735  | -1.60700 |
| H  | -2.61948 | 0.78805  | -1.74542 |
| C  | -0.49226 | 4.36371  | 1.42932  |
| H  | 0.11931  | 5.23841  | 1.17817  |
| H  | -0.18571 | 4.03230  | 2.42605  |
| H  | -1.53324 | 4.70048  | 1.48156  |
| C  | -0.47841 | 3.83231  | -1.03540 |
| H  | 0.27461  | 4.60021  | -1.24677 |
| H  | -1.46395 | 4.29954  | -1.14997 |
| H  | -0.36609 | 3.05963  | -1.80255 |
| C  | 3.03508  | -1.75310 | -1.37970 |
| H  | 3.27105  | -0.68940 | -1.54008 |
| C  | 2.28103  | -2.23858 | -2.60971 |
| H  | 2.86781  | -2.01931 | -3.50866 |
| H  | 1.31461  | -1.73593 | -2.71278 |
| H  | 2.11146  | -3.32049 | -2.58263 |
| C  | 4.33998  | -2.51249 | -1.18631 |
| H  | 4.97791  | -2.37645 | -2.06709 |
| H  | 4.16661  | -3.58934 | -1.07912 |
| H  | 4.90650  | -2.16808 | -0.31532 |
| C  | 1.63841  | -3.30553 | 0.87561  |
| H  | 0.86656  | -3.06664 | 1.62169  |
| C  | 1.03941  | -4.26255 | -0.14781 |
| H  | 1.81137  | -4.65542 | -0.81869 |
| H  | 0.27264  | -3.79003 | -0.77305 |
| H  | 0.58222  | -5.12091 | 0.35760  |
| C  | 2.79703  | -3.95103 | 1.62389  |
| H  | 3.66242  | -4.13159 | 0.97820  |
| H  | 2.47713  | -4.92180 | 2.02109  |
| H  | 3.12249  | -3.34565 | 2.47460  |
| C  | 3.03220  | -0.76103 | 1.36722  |
| H  | 3.53253  | 0.02915  | 0.78974  |
| H  | 3.80782  | -1.40587 | 1.79375  |
| C  | -1.27159 | 1.48973  | 2.48816  |
| H  | -2.04734 | 0.73405  | 2.67542  |
| H  | -1.57894 | 2.40474  | 3.00690  |
| C  | 0.86057  | 0.27752  | 2.01679  |
| C  | 1.81759  | 0.81550  | 4.59773  |
| C  | 2.14555  | -0.13075 | 2.40614  |
| C  | 0.08299  | 1.00241  | 2.93302  |

|   |          |          |          |
|---|----------|----------|----------|
| C | 0.56624  | 1.27340  | 4.21173  |
| C | 2.60867  | 0.11782  | 3.69529  |
| H | -0.04378 | 1.84073  | 4.91246  |
| H | 3.60375  | -0.21248 | 3.98843  |
| H | 2.18418  | 1.01597  | 5.60024  |
| O | 1.65247  | 1.14480  | -0.50342 |
| C | 2.00287  | 1.58448  | -1.70123 |
| C | 2.93290  | 2.67953  | -4.13209 |
| C | 3.14674  | 2.40607  | -1.74577 |
| C | 1.34490  | 1.32161  | -2.91078 |
| C | 1.81055  | 1.86565  | -4.10052 |
| C | 3.59610  | 2.94269  | -2.93779 |
| H | 3.65493  | 2.61171  | -0.80653 |
| H | 0.45740  | 0.69662  | -2.89817 |
| H | 1.27537  | 1.64843  | -5.02175 |
| H | 4.47858  | 3.57750  | -2.93529 |
| H | 3.28631  | 3.10151  | -5.06726 |
| C | -1.36563 | -1.72457 | 0.96438  |
| H | -0.98272 | -1.55563 | 1.96994  |
| H | -1.15437 | -2.75920 | 0.67038  |
| C | -2.84777 | -1.47707 | 0.97811  |
| O | -3.38476 | -1.00573 | 1.96036  |
| C | -3.64969 | -1.78669 | -0.24230 |
| C | -5.23899 | -2.23400 | -2.48605 |
| C | -5.00515 | -1.45362 | -0.22863 |
| C | -3.10459 | -2.36202 | -1.39079 |
| C | -3.89623 | -2.58223 | -2.50750 |
| C | -5.79491 | -1.67294 | -1.34228 |
| H | -5.41384 | -1.01519 | 0.67655  |
| H | -2.05344 | -2.63298 | -1.43429 |
| H | -3.46208 | -3.02369 | -3.39862 |
| H | -6.84694 | -1.40644 | -1.32359 |
| H | -5.85598 | -2.40245 | -3.36337 |
| H | -1.05793 | -1.22733 | -0.27641 |
| H | -0.36493 | -0.41253 | -1.51376 |

### TSC3ii

EE = -2262.256238

EE + ZPE = -2261.515152

G° = -2261.588302

Imaginary Freq = -1359.38

|    |          |          |          |
|----|----------|----------|----------|
| Ir | -0.06464 | 0.01513  | -0.09021 |
| P  | -1.72387 | -1.63749 | 0.23132  |
| P  | 1.94727  | 1.00184  | -0.87750 |
| C  | -3.47104 | -1.29520 | 0.76114  |
| H  | -3.84198 | -0.70008 | -0.08391 |
| C  | -1.00701 | -3.03996 | 1.24086  |
| H  | 0.07050  | -2.89027 | 1.09415  |
| C  | -4.35217 | -2.53329 | 0.86646  |
| H  | -4.06434 | -3.17589 | 1.70489  |
| H  | -4.33680 | -3.13519 | -0.04782 |
| H  | -5.39109 | -2.22714 | 1.03647  |
| C  | -3.54662 | -0.43068 | 2.01410  |
| H  | -3.24612 | -0.98062 | 2.91144  |
| H  | -4.57860 | -0.09193 | 2.16428  |
| H  | -2.91627 | 0.46185  | 1.93358  |
| C  | -1.37181 | -4.43186 | 0.74223  |
| H  | -0.88519 | -5.17820 | 1.38153  |
| H  | -1.03170 | -4.61068 | -0.28187 |
| H  | -2.44975 | -4.62170 | 0.78694  |
| C  | -1.28239 | -2.89899 | 2.73247  |
| H  | -0.65176 | -3.60734 | 3.28230  |

|   |          |          |          |
|---|----------|----------|----------|
| H | -2.32340 | -3.13562 | 2.97910  |
| H | -1.04341 | -1.89893 | 3.09881  |
| C | 3.10272  | 1.83065  | 0.31500  |
| H | 3.19875  | 1.03791  | 1.06840  |
| C | 2.49011  | 3.03393  | 1.01788  |
| H | 3.08747  | 3.28200  | 1.90324  |
| H | 1.46729  | 2.83098  | 1.35360  |
| H | 2.47022  | 3.92043  | 0.37584  |
| C | 4.49943  | 2.13155  | -0.20809 |
| H | 5.14004  | 2.43286  | 0.62977  |
| H | 4.50162  | 2.95496  | -0.93146 |
| H | 4.96833  | 1.25980  | -0.67598 |
| C | 1.85455  | 1.98112  | -2.46656 |
| H | 0.97963  | 1.54529  | -2.96506 |
| C | 1.57552  | 3.45802  | -2.21510 |
| H | 2.47062  | 3.97280  | -1.84864 |
| H | 0.77374  | 3.62702  | -1.48792 |
| H | 1.28057  | 3.94624  | -3.15058 |
| C | 3.03812  | 1.80589  | -3.40958 |
| H | 3.98680  | 2.11305  | -2.95747 |
| H | 2.88320  | 2.43022  | -4.29765 |
| H | 3.13818  | 0.77334  | -3.75598 |
| C | 2.83422  | -0.54007 | -1.35608 |
| H | 3.23216  | -0.94860 | -0.41637 |
| H | 3.68986  | -0.36008 | -2.01470 |
| C | -1.84110 | -2.29591 | -1.48431 |
| H | -2.45999 | -1.57222 | -2.03283 |
| H | -2.33388 | -3.27234 | -1.54110 |
| C | 0.48882  | -1.39124 | -1.50755 |
| C | 1.27126  | -3.32451 | -3.40093 |
| C | 1.82031  | -1.47178 | -1.95789 |
| C | -0.43283 | -2.33144 | -2.00858 |
| C | -0.03559 | -3.28896 | -2.93729 |
| C | 2.19687  | -2.41812 | -2.90687 |
| H | -0.76248 | -4.01032 | -3.30614 |
| H | 3.23019  | -2.45474 | -3.24752 |
| H | 1.56988  | -4.06484 | -4.13696 |
| O | 0.71695  | -0.63197 | 2.06424  |
| C | 1.97087  | -0.55560 | 2.51200  |
| C | 4.62721  | -0.39292 | 3.39997  |
| C | 2.92072  | -1.49960 | 2.10337  |
| C | 2.36566  | 0.44786  | 3.40381  |
| C | 3.68188  | 0.52746  | 3.83443  |
| C | 4.23207  | -1.41406 | 2.54189  |
| H | 2.60188  | -2.28903 | 1.42486  |
| H | 1.62332  | 1.16808  | 3.73959  |
| H | 3.97166  | 1.31933  | 4.52012  |
| H | 4.95611  | -2.15340 | 2.21029  |
| H | 5.65578  | -0.32734 | 3.73932  |
| C | -1.11637 | 1.03654  | -1.62352 |
| H | -1.00465 | 0.49742  | -2.57092 |
| H | -0.66635 | 2.02794  | -1.72402 |
| C | -2.57248 | 1.19198  | -1.37102 |
| O | -3.39313 | 0.47358  | -1.92151 |
| C | -3.05606 | 2.24745  | -0.42232 |
| C | -4.07542 | 4.13513  | 1.36046  |
| C | -4.42724 | 2.32900  | -0.18089 |
| C | -2.20395 | 3.13974  | 0.22771  |
| C | -2.71016 | 4.07600  | 1.11557  |
| C | -4.93534 | 3.26229  | 0.70618  |
| H | -5.07901 | 1.63810  | -0.70710 |
| H | -1.13283 | 3.08648  | 0.06176  |

|   |          |         |         |
|---|----------|---------|---------|
| H | -2.03668 | 4.76070 | 1.62179 |
| H | -6.00434 | 3.31283 | 0.88919 |
| H | -4.47025 | 4.86636 | 2.05947 |
| H | -0.46646 | 1.14346 | 1.28685 |
| H | 0.06868  | 0.45158 | 1.78814 |

# C6i

EE = -1877.574998

EE + ZPE = -1876.969717

G° = -1877.035945

|    |          |          |          |
|----|----------|----------|----------|
| Ir | 0.24447  | -0.02780 | -0.14006 |
| P  | 2.39572  | -0.88396 | 0.01611  |
| P  | -1.60178 | 1.41742  | -0.16878 |
| C  | 3.34133  | 0.58093  | 0.61544  |
| H  | 4.38012  | 0.58373  | 0.26146  |
| H  | 3.38374  | 0.48926  | 1.71043  |
| C  | -0.83089 | 2.91199  | -0.92335 |
| H  | -0.86680 | 2.75348  | -2.01170 |
| H  | -1.38448 | 3.83468  | -0.71207 |
| C  | 1.24168  | 1.76705  | -0.11704 |
| C  | 2.59977  | 4.24080  | -0.01452 |
| C  | 2.60459  | 1.83736  | 0.23432  |
| C  | 0.59472  | 2.97454  | -0.45302 |
| C  | 1.26177  | 4.19107  | -0.37762 |
| C  | 3.26542  | 3.06174  | 0.27897  |
| H  | 0.73148  | 5.10888  | -0.62448 |
| H  | 4.31719  | 3.08866  | 0.55859  |
| H  | 3.12103  | 5.19192  | 0.03247  |
| O  | -0.63393 | -1.77285 | 0.57603  |
| C  | -1.78702 | -2.30676 | 0.22601  |
| C  | -4.23324 | -3.51047 | -0.49317 |
| C  | -2.19801 | -2.37471 | -1.11606 |
| C  | -2.63481 | -2.86430 | 1.19808  |
| C  | -3.83650 | -3.45164 | 0.83852  |
| C  | -3.39891 | -2.97113 | -1.46467 |
| H  | -1.53698 | -1.95202 | -1.87104 |
| H  | -2.31851 | -2.82070 | 2.23732  |
| H  | -4.47522 | -3.87246 | 1.61104  |
| H  | -3.68769 | -3.01646 | -2.51205 |
| H  | -5.17358 | -3.97692 | -0.76882 |
| C  | 3.10041  | -1.32397 | -1.64352 |
| H  | 2.97606  | -0.37359 | -2.18664 |
| C  | 4.56527  | -1.72796 | -1.69510 |
| H  | 5.22391  | -1.03540 | -1.16118 |
| H  | 4.90129  | -1.76098 | -2.73790 |
| H  | 4.71166  | -2.73172 | -1.28102 |
| C  | 2.22277  | -2.38284 | -2.29945 |
| H  | 2.55923  | -2.57506 | -3.32449 |
| H  | 1.17150  | -2.08137 | -2.32884 |
| H  | 2.28003  | -3.33382 | -1.75535 |
| C  | 2.77477  | -2.25218 | 1.21426  |
| H  | 2.47216  | -3.16912 | 0.68694  |
| C  | 4.23914  | -2.35528 | 1.62560  |
| H  | 4.55740  | -1.46018 | 2.17248  |
| H  | 4.92381  | -2.49684 | 0.78776  |
| H  | 4.36809  | -3.20483 | 2.30612  |
| C  | 1.89018  | -2.09242 | 2.44739  |
| H  | 2.09285  | -1.14039 | 2.95632  |
| H  | 2.10762  | -2.89229 | 3.16469  |
| H  | 0.82956  | -2.12887 | 2.18667  |
| C  | -1.95797 | 1.96765  | 1.57414  |
| H  | -0.97744 | 2.38784  | 1.84896  |

|   |          |          |          |
|---|----------|----------|----------|
| C | -2.23273 | 0.78605  | 2.49725  |
| H | -1.47403 | 0.00109  | 2.39517  |
| H | -3.20611 | 0.32723  | 2.29338  |
| H | -2.23843 | 1.12241  | 3.54040  |
| C | -3.00235 | 3.06313  | 1.72997  |
| H | -2.80544 | 3.92977  | 1.09056  |
| H | -3.00921 | 3.41990  | 2.76665  |
| H | -4.01105 | 2.69800  | 1.50974  |
| C | -3.19115 | 1.14811  | -1.10545 |
| H | -2.85002 | 0.54312  | -1.95964 |
| C | -4.19746 | 0.31911  | -0.31706 |
| H | -3.75037 | -0.56885 | 0.13772  |
| H | -4.99448 | -0.02676 | -0.98464 |
| H | -4.66863 | 0.91612  | 0.47154  |
| C | -3.83882 | 2.41958  | -1.64063 |
| H | -3.17801 | 2.98975  | -2.29934 |
| H | -4.16533 | 3.08208  | -0.83193 |
| H | -4.73034 | 2.15418  | -2.22101 |
| H | 0.55967  | 0.38557  | -1.60384 |

# C6ii

EE = -1954.917758

EE + ZPE = -1954.279519

G° = -1954.347331

|    |          |          |          |
|----|----------|----------|----------|
| Ir | -0.28884 | -0.14222 | 0.19725  |
| P  | 1.22705  | 1.61076  | 0.43072  |
| P  | -2.35525 | -1.12133 | 0.03855  |
| C  | 3.08222  | 1.57773  | 0.47985  |
| H  | 3.29423  | 1.22046  | -0.54031 |
| C  | 0.52408  | 2.47994  | 1.93790  |
| H  | -0.53310 | 2.16135  | 1.91443  |
| C  | 3.73907  | 2.93996  | 0.65454  |
| H  | 3.56857  | 3.34373  | 1.65930  |
| H  | 3.38542  | 3.67580  | -0.07445 |
| H  | 4.82398  | 2.84631  | 0.52646  |
| C  | 3.64016  | 0.55402  | 1.46057  |
| H  | 3.61441  | 0.92579  | 2.49007  |
| H  | 4.68662  | 0.33868  | 1.21447  |
| H  | 3.08746  | -0.38990 | 1.42669  |
| C  | 0.53285  | 4.00086  | 1.87802  |
| H  | 0.07661  | 4.40677  | 2.78895  |
| H  | -0.03883 | 4.38239  | 1.02701  |
| H  | 1.55081  | 4.40079  | 1.81554  |
| C  | 1.12996  | 1.96088  | 3.23480  |
| H  | 0.54321  | 2.31782  | 4.08910  |
| H  | 2.15307  | 2.32889  | 3.37071  |
| H  | 1.15037  | 0.86701  | 3.27016  |
| C  | -3.34867 | -0.52357 | 1.50491  |
| H  | -2.89654 | 0.46656  | 1.67965  |
| C  | -3.09349 | -1.37586 | 2.74105  |
| H  | -3.48524 | -0.87074 | 3.63113  |
| H  | -2.02573 | -1.56124 | 2.89711  |
| H  | -3.60456 | -2.34292 | 2.66924  |
| C  | -4.83532 | -0.30616 | 1.26136  |
| H  | -5.30648 | 0.05766  | 2.18222  |
| H  | -5.34796 | -1.23110 | 0.97584  |
| H  | -5.01901 | 0.44267  | 0.48524  |
| C  | -2.62843 | -2.93176 | -0.27505 |
| H  | -2.16178 | -3.03268 | -1.26905 |
| C  | -1.85420 | -3.81921 | 0.69000  |
| H  | -2.34389 | -3.86900 | 1.66786  |
| H  | -0.83580 | -3.45096 | 0.84946  |

|   |          |          |          |
|---|----------|----------|----------|
| H | -1.80174 | -4.84175 | 0.29941  |
| C | -4.08513 | -3.35724 | -0.38792 |
| H | -4.58993 | -3.30015 | 0.58295  |
| H | -4.14714 | -4.39991 | -0.72115 |
| H | -4.64964 | -2.74875 | -1.10168 |
| C | -3.12410 | -0.29687 | -1.42451 |
| H | -4.21977 | -0.30083 | -1.40828 |
| H | -2.82118 | -0.90467 | -2.29139 |
| C | 0.82490  | 2.71973  | -0.98459 |
| H | 1.44094  | 2.33534  | -1.81136 |
| H | 1.10273  | 3.76651  | -0.81673 |
| C | -1.23395 | 1.29779  | -1.04034 |
| C | -2.64598 | 3.34245  | -2.37852 |
| C | -2.53606 | 1.08528  | -1.54262 |
| C | -0.62817 | 2.53978  | -1.32834 |
| C | -1.33630 | 3.55203  | -1.96982 |
| C | -3.23775 | 2.10215  | -2.18315 |
| H | -0.85615 | 4.50974  | -2.16417 |
| H | -4.24996 | 1.92243  | -2.54209 |
| H | -3.19764 | 4.13833  | -2.87036 |
| C | 0.39747  | -1.24555 | -1.43959 |
| H | -0.18191 | -0.93109 | -2.31461 |
| H | 0.25528  | -2.31308 | -1.24599 |
| C | 1.82206  | -0.88753 | -1.68091 |
| O | 2.11896  | 0.07584  | -2.36971 |
| C | 2.91025  | -1.72649 | -1.08446 |
| C | 5.02892  | -3.20636 | -0.03940 |
| C | 4.21705  | -1.49489 | -1.51369 |
| C | 2.67622  | -2.71597 | -0.13013 |
| C | 3.73170  | -3.44673 | 0.39313  |
| C | 5.27053  | -2.23047 | -0.99825 |
| H | 4.37939  | -0.72531 | -2.26233 |
| H | 1.67007  | -2.87574 | 0.24312  |
| H | 3.54214  | -4.20456 | 1.14708  |
| H | 6.28324  | -2.04580 | -1.34379 |
| H | 5.85353  | -3.78196 | 0.37073  |
| H | 0.42488  | -1.25803 | 1.22490  |

#### TSC4i

EE = -1877.529042

EE + ZPE = -1876.926851

G° = -1876.993426

Imaginary Freq = -1219.57

|    |          |          |          |
|----|----------|----------|----------|
| Ir | 0.25274  | -0.04002 | -0.16517 |
| P  | 2.34132  | -1.00100 | -0.03013 |
| P  | -1.53144 | 1.46597  | -0.02826 |
| C  | 3.43947  | 0.30589  | -0.71743 |
| H  | 3.62410  | 0.02945  | -1.76543 |
| H  | 4.41976  | 0.34712  | -0.22555 |
| C  | -0.83113 | 2.92814  | -0.90252 |
| H  | -1.10486 | 2.80670  | -1.96047 |
| H  | -1.25980 | 3.87972  | -0.56507 |
| C  | 1.29757  | 1.63467  | -0.59769 |
| C  | 2.78678  | 4.02601  | -0.88486 |
| C  | 2.71120  | 1.62152  | -0.67939 |
| C  | 0.66278  | 2.88683  | -0.77041 |
| C  | 1.40114  | 4.05917  | -0.88941 |
| C  | 3.43401  | 2.80289  | -0.80229 |
| H  | 0.88102  | 5.00872  | -0.99996 |
| H  | 4.52089  | 2.76076  | -0.84444 |
| H  | 3.35860  | 4.94518  | -0.96888 |
| O  | -0.70689 | -2.12961 | -0.22721 |

|   |          |          |          |
|---|----------|----------|----------|
| C | -2.01536 | -2.39494 | -0.27426 |
| C | -4.72767 | -3.11210 | -0.34287 |
| C | -2.66263 | -2.85695 | 0.87782  |
| C | -2.75512 | -2.28271 | -1.45672 |
| C | -4.09445 | -2.64023 | -1.48534 |
| C | -3.99977 | -3.21861 | 0.83620  |
| H | -2.08287 | -2.93907 | 1.79313  |
| H | -2.25339 | -1.92922 | -2.35505 |
| H | -4.64901 | -2.55520 | -2.41628 |
| H | -4.48080 | -3.58746 | 1.73818  |
| H | -5.77424 | -3.39776 | -0.37168 |
| C | 2.73048  | -2.56180 | -0.95980 |
| H | 2.17157  | -2.39845 | -1.89411 |
| C | 4.19236  | -2.79549 | -1.31650 |
| H | 4.64129  | -1.94880 | -1.84452 |
| H | 4.27025  | -3.66823 | -1.97564 |
| H | 4.80500  | -3.00336 | -0.43463 |
| C | 2.11598  | -3.76134 | -0.24931 |
| H | 2.19578  | -4.65228 | -0.88226 |
| H | 1.05796  | -3.59302 | -0.02531 |
| H | 2.64362  | -3.98168 | 0.68657  |
| C | 2.86874  | -1.23127 | 1.74152  |
| H | 2.15762  | -1.97853 | 2.12348  |
| C | 4.28915  | -1.73155 | 1.95878  |
| H | 5.02719  | -1.08428 | 1.46934  |
| H | 4.43938  | -2.75128 | 1.59596  |
| H | 4.52281  | -1.72940 | 3.03014  |
| C | 2.64011  | 0.07599  | 2.49332  |
| H | 3.29780  | 0.87131  | 2.12110  |
| H | 2.85594  | -0.06140 | 3.55897  |
| H | 1.60792  | 0.42989  | 2.39329  |
| C | -1.61715 | 2.05905  | 1.74116  |
| H | -0.58651 | 2.42968  | 1.87083  |
| C | -1.82299 | 0.90590  | 2.71704  |
| H | -1.12147 | 0.08647  | 2.52295  |
| H | -2.83576 | 0.49434  | 2.65118  |
| H | -1.67520 | 1.25292  | 3.74668  |
| C | -2.57023 | 3.20954  | 2.02984  |
| H | -2.43148 | 4.05693  | 1.35106  |
| H | -2.40380 | 3.57939  | 3.04866  |
| H | -3.61732 | 2.89342  | 1.97166  |
| C | -3.25418 | 1.27868  | -0.71852 |
| H | -3.07134 | 0.67729  | -1.62268 |
| C | -4.15737 | 0.47061  | 0.20238  |
| H | -3.68562 | -0.45353 | 0.54898  |
| H | -5.07281 | 0.18827  | -0.32912 |
| H | -4.45732 | 1.05745  | 1.07788  |
| C | -3.93063 | 2.57939  | -1.13389 |
| H | -3.35497 | 3.14340  | -1.87267 |
| H | -4.11607 | 3.23510  | -0.27700 |
| H | -4.90453 | 2.35193  | -1.58354 |
| H | -0.30016 | -1.21221 | -1.17549 |

#### TSC4ii

EE = -1954.909601

EE + ZPE = -1954.272204

G° = -1954.340105

Imaginary Freq = -683.18

|    |          |          |          |
|----|----------|----------|----------|
| Ir | -0.48706 | 0.05796  | -0.39762 |
| P  | 0.82414  | 1.96755  | -0.09050 |
| P  | -2.25706 | -1.40683 | -0.07771 |
| C  | 2.41314  | 2.37209  | -0.98552 |

|   |          |          |          |
|---|----------|----------|----------|
| H | 2.28531  | 1.82281  | -1.92887 |
| C | 1.03280  | 2.31252  | 1.73620  |
| H | -0.02386 | 2.36535  | 2.04172  |
| C | 2.62468  | 3.84732  | -1.30232 |
| H | 2.72424  | 4.45378  | -0.39557 |
| H | 1.81836  | 4.27134  | -1.90665 |
| H | 3.55386  | 3.96348  | -1.87333 |
| C | 3.64088  | 1.79858  | -0.28885 |
| H | 3.94563  | 2.42016  | 0.56058  |
| H | 4.48144  | 1.76335  | -0.99127 |
| H | 3.49175  | 0.77948  | 0.07755  |
| C | 1.69637  | 3.63610  | 2.09118  |
| H | 1.60114  | 3.81700  | 3.16859  |
| H | 1.24371  | 4.49124  | 1.58005  |
| H | 2.76701  | 3.63021  | 1.86140  |
| C | 1.67030  | 1.15706  | 2.49542  |
| H | 1.62158  | 1.34717  | 3.57438  |
| H | 2.72634  | 1.02478  | 2.23513  |
| H | 1.14720  | 0.21790  | 2.28963  |
| C | -2.35281 | -1.98867 | 1.69647  |
| H | -2.48265 | -1.02062 | 2.20723  |
| C | -1.04492 | -2.59667 | 2.18463  |
| H | -1.11763 | -2.84025 | 3.25116  |
| H | -0.21469 | -1.89760 | 2.04951  |
| H | -0.80232 | -3.52574 | 1.65455  |
| C | -3.53054 | -2.88550 | 2.05084  |
| H | -3.60600 | -2.98214 | 3.14039  |
| H | -3.39897 | -3.89664 | 1.64956  |
| H | -4.48962 | -2.50012 | 1.69137  |
| C | -2.65623 | -2.83466 | -1.22405 |
| H | -2.42052 | -2.38262 | -2.20079 |
| C | -1.72988 | -4.02599 | -1.02039 |
| H | -1.93612 | -4.53329 | -0.07097 |
| H | -0.67378 | -3.74602 | -1.03351 |
| H | -1.88519 | -4.76235 | -1.81726 |
| C | -4.10794 | -3.29861 | -1.25841 |
| H | -4.39217 | -3.81493 | -0.33697 |
| H | -4.24170 | -4.01079 | -2.08167 |
| H | -4.81598 | -2.48145 | -1.41911 |
| C | -3.74657 | -0.32961 | -0.20947 |
| H | -4.55962 | -0.65547 | 0.45190  |
| H | -4.11787 | -0.42932 | -1.23923 |
| C | -0.34672 | 3.30890  | -0.56348 |
| H | -0.28684 | 3.39974  | -1.65668 |
| H | -0.08394 | 4.28599  | -0.14065 |
| C | -1.99391 | 1.46947  | -0.16052 |
| C | -4.00563 | 3.38785  | 0.38512  |
| C | -3.34289 | 1.09746  | 0.02118  |
| C | -1.72143 | 2.85592  | -0.17130 |
| C | -2.70670 | 3.79337  | 0.11742  |
| C | -4.32378 | 2.04189  | 0.31128  |
| H | -2.45694 | 4.85253  | 0.12033  |
| H | -5.35127 | 1.71796  | 0.46641  |
| H | -4.77125 | 4.12059  | 0.62264  |
| C | 0.99452  | -1.56544 | -1.07710 |
| H | 0.42701  | -1.52246 | -2.01442 |
| H | 0.92375  | -2.56786 | -0.64440 |
| C | 2.40152  | -1.19324 | -1.36270 |
| O | 2.70446  | -0.49536 | -2.31226 |
| C | 3.47139  | -1.69987 | -0.44144 |
| C | 5.54898  | -2.52100 | 1.22642  |
| C | 4.79873  | -1.59068 | -0.85625 |

|   |         |          |          |
|---|---------|----------|----------|
| C | 3.19871 | -2.22816 | 0.81983  |
| C | 4.23353 | -2.62817 | 1.65325  |
| C | 5.83032 | -2.00530 | -0.03359 |
| H | 4.99102 | -1.16436 | -1.83618 |
| H | 2.17368 | -2.31382 | 1.17019  |
| H | 4.01150 | -3.02564 | 2.63872  |
| H | 6.85957 | -1.92362 | -0.36932 |
| H | 6.35810 | -2.83935 | 1.87681  |
| H | 0.66298 | -0.94079 | 0.21221  |

# **Reaction between (PCP)Co and 1 along pathway**

## **A**

### **Cobalt catalyst**

EE = -1610.577162

EE + ZPE = -1610.075474

G° = -1610.134208

|   |          |          |          |
|---|----------|----------|----------|
| P | -2.17530 | 0.49199  | -0.10542 |
| P | 2.17530  | 0.49199  | 0.10541  |
| C | -2.34830 | -1.19196 | -0.84444 |
| H | -2.34859 | -1.04542 | -1.93425 |
| H | -3.28710 | -1.70048 | -0.58681 |
| C | 2.34830  | -1.19196 | 0.84444  |
| H | 3.28710  | -1.70048 | 0.58682  |
| H | 2.34859  | -1.04541 | 1.93425  |
| C | 0.00000  | -1.22285 | -0.00000 |
| C | -0.00000 | -4.05009 | 0.00001  |
| C | -1.13115 | -1.95929 | -0.40743 |
| C | 1.13115  | -1.95929 | 0.40743  |
| C | 1.12992  | -3.35019 | 0.39879  |
| C | -1.12992 | -3.35019 | -0.39878 |
| H | 2.02183  | -3.89097 | 0.71208  |
| H | -2.02183 | -3.89097 | -0.71207 |
| H | -0.00000 | -5.13618 | 0.00001  |
| C | -3.15644 | 1.61017  | -1.23437 |
| H | -2.46100 | 1.70624  | -2.08294 |
| C | -3.07771 | 0.42702  | 1.52970  |
| H | -2.96267 | 1.44791  | 1.92440  |
| C | 3.07772  | 0.42701  | -1.52970 |
| H | 2.96269  | 1.44790  | -1.92440 |
| C | 3.15643  | 1.61018  | 1.23437  |
| H | 2.46098  | 1.70625  | 2.08294  |
| C | 4.47763  | 1.08401  | 1.77783  |
| H | 4.37712  | 0.09326  | 2.23109  |
| H | 4.85516  | 1.76162  | 2.55357  |
| H | 5.24742  | 1.02028  | 1.00408  |
| C | 3.31437  | 2.98557  | 0.60244  |
| H | 4.01078  | 2.95793  | -0.24436 |
| H | 3.71428  | 3.70262  | 1.32834  |
| H | 2.35836  | 3.37783  | 0.23610  |
| C | 4.55841  | 0.08016  | -1.48669 |
| H | 4.74051  | -0.85737 | -0.94771 |
| H | 5.16285  | 0.86184  | -1.01978 |
| H | 4.93792  | -0.05842 | -2.50648 |
| C | 2.32881  | -0.52237 | -2.45860 |
| H | 2.41144  | -1.56052 | -2.11433 |
| H | 2.75175  | -0.47101 | -3.46879 |
| H | 1.26212  | -0.28122 | -2.50718 |
| C | -2.32880 | -0.52236 | 2.45860  |
| H | -2.41143 | -1.56052 | 2.11433  |
| H | -2.75173 | -0.47099 | 3.46879  |
| H | -1.26211 | -0.28121 | 2.50718  |
| C | -4.55840 | 0.08016  | 1.48670  |

|    |          |          |          |
|----|----------|----------|----------|
| H  | -4.74050 | -0.85737 | 0.94773  |
| H  | -5.16284 | 0.86184  | 1.01979  |
| H  | -4.93791 | -0.05841 | 2.50649  |
| C  | -3.31438 | 2.98556  | -0.60244 |
| H  | -3.71430 | 3.70262  | -1.32834 |
| H  | -2.35838 | 3.37782  | -0.23611 |
| H  | -4.01079 | 2.95792  | 0.24437  |
| C  | -4.47764 | 1.08399  | -1.77783 |
| H  | -4.37713 | 0.09325  | -2.23109 |
| H  | -4.85518 | 1.76160  | -2.55357 |
| H  | -5.24742 | 1.02026  | -1.00407 |
| Co | 0.00000  | 0.66402  | -0.00001 |

# TSA1

EE = -2302.605645

EE + ZPE = -2301.859455

G° = -2301.930205

Imaginary Freq = -523.16

|   |          |          |          |
|---|----------|----------|----------|
| P | -1.96320 | 0.14305  | 0.86939  |
| P | 1.87428  | 1.34394  | -0.64558 |
| C | -3.07027 | 1.43895  | 0.15893  |
| H | -3.94497 | 1.68565  | 0.77160  |
| H | -3.43591 | 1.04218  | -0.79810 |
| C | 1.58116  | 3.16235  | -0.43727 |
| H | 1.90546  | 3.67300  | -1.35240 |
| H | 2.19301  | 3.57846  | 0.37559  |
| C | 0.11491  | 3.39977  | -0.22718 |
| C | -2.59513 | 3.90876  | 0.10307  |
| C | -0.34738 | 4.70875  | -0.09811 |
| C | -0.76616 | 2.30405  | -0.19617 |
| C | -2.13734 | 2.60092  | -0.01364 |
| C | -1.69897 | 4.96713  | 0.05733  |
| H | 0.36290  | 5.53385  | -0.12281 |
| H | -2.05349 | 5.98940  | 0.15398  |
| H | -3.65756 | 4.09933  | 0.24585  |
| C | 3.08803  | 1.35140  | -2.09125 |
| H | 2.41993  | 1.58610  | -2.93466 |
| C | 3.70463  | -0.01529 | -2.35466 |
| H | 2.94890  | -0.72808 | -2.68498 |
| H | 4.21018  | -0.41400 | -1.46559 |
| H | 4.45776  | 0.06132  | -3.14787 |
| C | 4.18513  | 2.41471  | -2.06988 |
| H | 5.00049  | 2.14456  | -1.39488 |
| H | 3.83623  | 3.41070  | -1.78684 |
| H | 4.61808  | 2.49720  | -3.07416 |
| C | 2.85471  | 0.79989  | 0.85416  |
| H | 2.94490  | -0.28687 | 0.71063  |
| C | 4.24626  | 1.37750  | 1.05459  |
| H | 4.63282  | 1.05398  | 2.02951  |
| H | 4.24484  | 2.47469  | 1.05348  |
| H | 4.95825  | 1.03642  | 0.29872  |
| C | 1.99708  | 1.02379  | 2.09097  |
| H | 1.01938  | 0.55377  | 1.96319  |
| H | 1.83877  | 2.09246  | 2.28898  |
| H | 2.48203  | 0.58510  | 2.97208  |
| C | -3.06975 | -1.35334 | 1.02425  |
| H | -3.37132 | -1.49855 | -0.02258 |
| C | -2.32661 | -2.60877 | 1.46317  |
| H | -2.93629 | -3.49533 | 1.24824  |
| H | -2.13148 | -2.60442 | 2.54091  |
| H | -1.37216 | -2.73134 | 0.94213  |
| C | -4.33854 | -1.16513 | 1.84463  |

|    |          |          |          |
|----|----------|----------|----------|
| H  | -4.99254 | -2.03567 | 1.71088  |
| H  | -4.90907 | -0.27937 | 1.54876  |
| H  | -4.12173 | -1.09016 | 2.91579  |
| C  | -1.62525 | 0.80082  | 2.59942  |
| H  | -0.82688 | 1.52742  | 2.40458  |
| C  | -1.06898 | -0.26658 | 3.53373  |
| H  | -1.85782 | -0.93561 | 3.89548  |
| H  | -0.62161 | 0.21032  | 4.41438  |
| H  | -0.29230 | -0.87828 | 3.06194  |
| C  | -2.76579 | 1.55913  | 3.26587  |
| H  | -3.64590 | 0.93173  | 3.43752  |
| H  | -3.07324 | 2.43454  | 2.68682  |
| H  | -2.43029 | 1.92315  | 4.24502  |
| C  | 0.01708  | -1.21023 | -1.68804 |
| C  | 0.94301  | -2.43090 | -1.57809 |
| H  | 1.95633  | -2.06879 | -1.75195 |
| H  | 0.70283  | -3.15464 | -2.36620 |
| O  | 0.86117  | -3.09601 | -0.32643 |
| C  | 1.89089  | -2.92938 | 0.55354  |
| C  | 3.89453  | -2.55523 | 2.45882  |
| C  | 1.56344  | -2.79416 | 1.89905  |
| C  | 3.22927  | -2.92139 | 0.16816  |
| C  | 4.22040  | -2.72628 | 1.12125  |
| C  | 2.55993  | -2.60673 | 2.84246  |
| H  | 0.51608  | -2.82811 | 2.18270  |
| H  | 3.50320  | -3.07293 | -0.87100 |
| H  | 5.26072  | -2.71546 | 0.80860  |
| H  | 2.28673  | -2.48579 | 3.88708  |
| H  | 4.67356  | -2.39907 | 3.19788  |
| O  | 0.55301  | -0.55110 | -2.82964 |
| H  | 0.22775  | 0.35732  | -2.81620 |
| C  | -1.41850 | -1.59001 | -1.96640 |
| C  | -4.05768 | -2.28929 | -2.64100 |
| C  | -1.90735 | -2.87432 | -1.72575 |
| C  | -2.28082 | -0.66706 | -2.56922 |
| C  | -3.58230 | -1.00763 | -2.89592 |
| C  | -3.21172 | -3.21908 | -2.05792 |
| H  | -1.26832 | -3.62079 | -1.26407 |
| H  | -1.93008 | 0.34004  | -2.78311 |
| H  | -4.22796 | -0.26961 | -3.36347 |
| H  | -3.56304 | -4.22834 | -1.86205 |
| H  | -5.07492 | -2.56022 | -2.90593 |
| H  | 0.37889  | -0.91738 | -0.21077 |
| Co | -0.17602 | 0.43798  | -0.44514 |

# A2

EE = -2302.617824

EE + ZPE = -2301.871333

G° = -2301.943598

|   |          |          |          |
|---|----------|----------|----------|
| P | -1.78734 | -0.80535 | 1.04357  |
| P | 0.90806  | 2.20005  | -0.35484 |
| C | -3.42335 | -0.12267 | 0.51843  |
| H | -4.19108 | -0.16948 | 1.30146  |
| H | -3.77683 | -0.75048 | -0.31307 |
| C | -0.25615 | 3.35635  | -1.20946 |
| H | -0.10874 | 3.19442  | -2.28743 |
| H | -0.05015 | 4.41820  | -1.01970 |
| C | -1.64710 | 2.95043  | -0.79968 |
| C | -4.21389 | 2.19406  | -0.05086 |
| C | -2.70118 | 3.85396  | -0.90278 |
| C | -1.84756 | 1.64179  | -0.30971 |
| C | -3.16588 | 1.28229  | 0.04524  |

|   |          |          |          |
|---|----------|----------|----------|
| C | -3.98123 | 3.47783  | -0.52198 |
| H | -2.52116 | 4.86050  | -1.27635 |
| H | -4.80035 | 4.18804  | -0.59280 |
| H | -5.21972 | 1.89907  | 0.24279  |
| C | 2.50461  | 2.28587  | -1.31683 |
| H | 2.29958  | 1.56988  | -2.12363 |
| C | 3.66932  | 1.76121  | -0.48327 |
| H | 3.41942  | 0.84652  | 0.06832  |
| H | 4.01059  | 2.50383  | 0.24641  |
| H | 4.52419  | 1.52681  | -1.12887 |
| C | 2.84048  | 3.61553  | -1.98191 |
| H | 3.03668  | 4.41451  | -1.26158 |
| H | 2.04519  | 3.95576  | -2.65155 |
| H | 3.74617  | 3.49774  | -2.58964 |
| C | 1.26212  | 3.02479  | 1.28928  |
| H | 1.90707  | 2.29559  | 1.80260  |
| C | 1.98785  | 4.36207  | 1.21804  |
| H | 2.07529  | 4.78447  | 2.22643  |
| H | 1.43136  | 5.09004  | 0.61515  |
| H | 2.99773  | 4.28461  | 0.81061  |
| C | -0.01321 | 3.19199  | 2.10564  |
| H | -0.58080 | 2.26381  | 2.18387  |
| H | -0.67644 | 3.94157  | 1.65722  |
| H | 0.23716  | 3.53285  | 3.11736  |
| C | -2.00349 | -2.64911 | 1.03670  |
| H | -2.00950 | -2.84638 | -0.03951 |
| C | -0.77821 | -3.34580 | 1.61111  |
| H | -0.80986 | -4.41584 | 1.37107  |
| H | -0.73794 | -3.25852 | 2.70386  |
| H | 0.14971  | -2.93601 | 1.19429  |
| C | -3.30428 | -3.21762 | 1.58673  |
| H | -3.38163 | -4.27317 | 1.29646  |
| H | -4.18585 | -2.70807 | 1.18388  |
| H | -3.35694 | -3.17659 | 2.67807  |
| C | -1.68680 | -0.19880 | 2.81279  |
| H | -1.95302 | 0.86130  | 2.68108  |
| C | -0.27445 | -0.27041 | 3.38034  |
| H | 0.01512  | -1.30718 | 3.58778  |
| H | -0.22129 | 0.27978  | 4.32818  |
| H | 0.46619  | 0.14469  | 2.69025  |
| C | -2.68311 | -0.80480 | 3.79128  |
| H | -2.41508 | -1.83566 | 4.04604  |
| H | -3.71165 | -0.80224 | 3.41772  |
| H | -2.67264 | -0.23119 | 4.72604  |
| C | 0.34897  | -0.76322 | -1.60297 |
| C | 1.77977  | -1.27125 | -1.60280 |
| H | 2.44879  | -0.40548 | -1.60316 |
| H | 1.97045  | -1.83926 | -2.52980 |
| O | 2.04471  | -2.08982 | -0.47816 |
| C | 3.27635  | -2.00026 | 0.08370  |
| C | 5.73712  | -1.82035 | 1.37161  |
| C | 3.34510  | -2.08689 | 1.47165  |
| C | 4.44029  | -1.83605 | -0.66128 |
| C | 5.66331  | -1.74364 | -0.01092 |
| C | 4.57172  | -1.99950 | 2.10775  |
| H | 2.41910  | -2.20387 | 2.02696  |
| H | 4.39031  | -1.78320 | -1.74446 |
| H | 6.56851  | -1.61424 | -0.59692 |
| H | 4.61745  | -2.05981 | 3.19105  |
| H | 6.69612  | -1.74543 | 1.87375  |
| O | 0.36182  | 0.22307  | -2.62898 |
| H | -0.53406 | 0.56516  | -2.72243 |

|    |          |          |          |
|----|----------|----------|----------|
| C  | -0.66657 | -1.82739 | -1.92231 |
| C  | -2.57462 | -3.79182 | -2.58695 |
| C  | -0.36359 | -3.18948 | -1.83752 |
| C  | -1.94831 | -1.47794 | -2.36491 |
| C  | -2.88958 | -2.44192 | -2.68726 |
| C  | -1.30500 | -4.15667 | -2.16574 |
| H  | 0.61515  | -3.50289 | -1.49055 |
| H  | -2.23442 | -0.43005 | -2.43584 |
| H  | -3.87572 | -2.13537 | -3.02487 |
| H  | -1.03727 | -5.20692 | -2.09130 |
| H  | -3.30934 | -4.54831 | -2.84433 |
| H  | 0.79196  | -0.36016 | 0.52590  |
| Co | -0.32472 | 0.36091  | -0.12472 |

# TSA2

EE = -2302.590675

EE + ZPE = -2301.844352

G° = -2301.915067

Imaginary Freq = -408.28

|   |          |          |          |
|---|----------|----------|----------|
| P | -0.81156 | -0.54841 | 1.33880  |
| P | 2.63109  | 0.09234  | -0.54270 |
| C | -1.19642 | -2.30885 | 0.92025  |
| H | -2.05773 | -2.27515 | 0.24113  |
| H | -1.49619 | -2.90238 | 1.79049  |
| C | 3.10248  | -1.48252 | -1.38807 |
| H | 3.00943  | -1.31222 | -2.46814 |
| H | 4.13945  | -1.78029 | -1.19129 |
| C | 0.01767  | -2.87199 | 0.25120  |
| C | 2.41322  | -3.83462 | -0.77992 |
| C | 0.34300  | -4.22227 | 0.36231  |
| C | 0.87325  | -1.97907 | -0.41517 |
| C | 2.10053  | -2.48357 | -0.88844 |
| C | 1.52639  | -4.71009 | -0.17141 |
| H | -0.33332 | -4.89244 | 0.88999  |
| H | 1.77300  | -5.76375 | -0.08148 |
| H | 3.37150  | -4.19635 | -1.14820 |
| C | -2.51671 | 0.03392  | 1.84386  |
| H | -3.09058 | -0.27581 | 0.96182  |
| C | -2.67158 | 1.54244  | 1.96317  |
| H | -2.26881 | 2.07137  | 1.09431  |
| H | -2.17204 | 1.94584  | 2.85090  |
| H | -3.73696 | 1.79279  | 2.04574  |
| C | -3.13236 | -0.68012 | 3.04062  |
| H | -3.09726 | -1.76984 | 2.94866  |
| H | -4.18955 | -0.39779 | 3.11969  |
| H | -2.65554 | -0.39985 | 3.98600  |
| C | 0.22689  | -0.67836 | 2.89905  |
| H | 1.23745  | -0.72475 | 2.47874  |
| C | 0.13621  | 0.58268  | 3.75053  |
| H | 0.92906  | 0.58006  | 4.50870  |
| H | -0.81802 | 0.63926  | 4.28411  |
| H | 0.24021  | 1.50144  | 3.16292  |
| C | 0.04347  | -1.92792 | 3.74802  |
| H | 0.25887  | -2.84192 | 3.18540  |
| H | -0.96582 | -2.00919 | 4.16392  |
| H | 0.74181  | -1.89594 | 4.59390  |
| C | 3.76419  | 0.08153  | 0.96431  |
| H | 4.74856  | 0.34745  | 0.54415  |
| C | 3.37928  | 1.12400  | 2.00679  |
| H | 2.46925  | 0.82914  | 2.53598  |
| H | 3.20529  | 2.11874  | 1.58989  |
| H | 4.17431  | 1.21094  | 2.75670  |

|    |          |          |          |
|----|----------|----------|----------|
| C  | 3.88449  | -1.29288 | 1.61437  |
| H  | 4.36231  | -2.03017 | 0.96451  |
| H  | 2.91061  | -1.70554 | 1.90337  |
| H  | 4.49140  | -1.21365 | 2.52433  |
| C  | 3.46455  | 1.38224  | -1.61192 |
| H  | 4.47789  | 0.96708  | -1.74683 |
| C  | 3.58604  | 2.75284  | -0.95819 |
| H  | 4.01064  | 3.46183  | -1.67795 |
| H  | 4.24303  | 2.75041  | -0.08482 |
| H  | 2.60586  | 3.14223  | -0.65759 |
| C  | 2.80997  | 1.52662  | -2.97813 |
| H  | 3.44221  | 2.15394  | -3.61746 |
| H  | 1.83694  | 2.01508  | -2.87208 |
| H  | 2.66279  | 0.57419  | -3.49622 |
| O  | 0.09744  | 1.80605  | -1.24696 |
| C  | -0.26268 | 2.87450  | -0.54525 |
| C  | -0.92618 | 5.15342  | 0.96251  |
| C  | -1.06141 | 3.88804  | -1.09279 |
| C  | 0.21116  | 3.03972  | 0.76318  |
| C  | -0.10651 | 4.16740  | 1.49908  |
| C  | -1.39422 | 5.00240  | -0.33569 |
| H  | -1.39991 | 3.80959  | -2.12172 |
| H  | 0.82915  | 2.24807  | 1.17969  |
| H  | 0.28010  | 4.27042  | 2.51056  |
| H  | -2.02168 | 5.77230  | -0.77634 |
| H  | -1.18751 | 6.03153  | 1.54356  |
| C  | -1.25478 | -0.36455 | -2.16159 |
| C  | -2.65515 | -0.64247 | -1.75579 |
| C  | -5.33136 | -1.20822 | -1.06965 |
| C  | -3.50887 | 0.35511  | -1.26572 |
| C  | -3.18655 | -1.92837 | -1.90412 |
| C  | -4.49941 | -2.20758 | -1.55617 |
| C  | -4.82688 | 0.07855  | -0.93784 |
| H  | -3.13677 | 1.36466  | -1.10228 |
| H  | -2.54941 | -2.70876 | -2.30689 |
| H  | -4.87929 | -3.21815 | -1.67766 |
| H  | -5.45986 | 0.87755  | -0.56054 |
| H  | -6.36109 | -1.42681 | -0.80511 |
| C  | -0.96923 | 0.95566  | -2.55749 |
| H  | -1.73596 | 1.72034  | -2.49087 |
| H  | -0.24543 | 1.08215  | -3.35534 |
| O  | -0.70612 | -1.36587 | -2.98358 |
| H  | -0.11297 | -1.90321 | -2.44664 |
| H  | 1.13052  | -0.14663 | -1.91888 |
| Co | 0.43227  | -0.09163 | -0.63508 |

### A3

EE = -1917.953319

EE + ZPE = -1917.348186

G° = -1917.412108

|   |          |          |          |
|---|----------|----------|----------|
| P | -2.17399 | -0.32900 | 0.05010  |
| P | 1.94641  | 1.09154  | 0.58045  |
| C | -2.56616 | 0.65704  | -1.45813 |
| H | -3.62694 | 0.91865  | -1.55928 |
| H | -2.30859 | 0.01781  | -2.31651 |
| C | 1.49002  | 2.87385  | 0.40875  |
| H | 1.20246  | 3.24425  | 1.39982  |
| H | 2.33067  | 3.48870  | 0.06132  |
| C | -1.67190 | 1.86592  | -1.39180 |
| C | -0.01454 | 4.08613  | -1.21214 |
| C | -1.98986 | 3.03499  | -2.07748 |
| C | -0.50468 | 1.78003  | -0.61090 |

|    |          |          |          |
|----|----------|----------|----------|
| C  | 0.30037  | 2.92814  | -0.50966 |
| C  | -1.15633 | 4.14027  | -1.99962 |
| H  | -2.89527 | 3.07787  | -2.68005 |
| H  | -1.40206 | 5.04841  | -2.54201 |
| H  | 0.63178  | 4.95843  | -1.13230 |
| C  | -3.22348 | 0.40723  | 1.39114  |
| H  | -2.94461 | 1.46911  | 1.29891  |
| C  | -2.79670 | -0.07834 | 2.77171  |
| H  | -1.70979 | -0.04533 | 2.89948  |
| H  | -3.12003 | -1.10909 | 2.94909  |
| H  | -3.25529 | 0.54676  | 3.54625  |
| C  | -4.72797 | 0.27938  | 1.20596  |
| H  | -5.06441 | 0.58318  | 0.20947  |
| H  | -5.24577 | 0.91403  | 1.93463  |
| H  | -5.06316 | -0.74868 | 1.38105  |
| C  | -2.67657 | -2.07068 | -0.34129 |
| H  | -1.88280 | -2.36361 | -1.04750 |
| C  | -2.56418 | -2.97886 | 0.87730  |
| H  | -2.61582 | -4.02724 | 0.56248  |
| H  | -3.39358 | -2.80934 | 1.57440  |
| H  | -1.61686 | -2.82625 | 1.40457  |
| C  | -4.01869 | -2.22779 | -1.04361 |
| H  | -4.10585 | -1.60271 | -1.93786 |
| H  | -4.85660 | -1.98881 | -0.38157 |
| H  | -4.14323 | -3.27011 | -1.36019 |
| C  | 3.34421  | 0.95441  | -0.64925 |
| H  | 4.03088  | 1.76507  | -0.35336 |
| C  | 4.09011  | -0.37016 | -0.58349 |
| H  | 3.41670  | -1.21893 | -0.74992 |
| H  | 4.60163  | -0.51578 | 0.37205  |
| H  | 4.85295  | -0.39777 | -1.37027 |
| C  | 2.84504  | 1.22480  | -2.06182 |
| H  | 2.31754  | 2.17895  | -2.15519 |
| H  | 2.16414  | 0.43092  | -2.38779 |
| H  | 3.69315  | 1.23788  | -2.75602 |
| C  | 2.78977  | 0.88299  | 2.22813  |
| H  | 3.82123  | 1.24471  | 2.09047  |
| C  | 2.80766  | -0.58945 | 2.63018  |
| H  | 3.38489  | -0.71115 | 3.55418  |
| H  | 3.24327  | -1.24180 | 1.86850  |
| H  | 1.78793  | -0.95114 | 2.79465  |
| C  | 2.12265  | 1.69937  | 3.32617  |
| H  | 2.57232  | 1.44868  | 4.29356  |
| H  | 1.05297  | 1.46296  | 3.39463  |
| H  | 2.22921  | 2.77842  | 3.18490  |
| O  | 0.40397  | -1.64671 | 0.99105  |
| C  | 0.90507  | -2.31539 | -0.00526 |
| C  | 2.06702  | -3.68325 | -2.19773 |
| C  | 1.58908  | -3.53640 | 0.17331  |
| C  | 0.80643  | -1.82767 | -1.33013 |
| C  | 1.38783  | -2.49100 | -2.40175 |
| C  | 2.15219  | -4.19548 | -0.90292 |
| H  | 1.67022  | -3.92821 | 1.18390  |
| H  | 0.23287  | -0.90484 | -1.53093 |
| H  | 1.30104  | -2.07509 | -3.40275 |
| H  | 2.67832  | -5.13176 | -0.73320 |
| H  | 2.51566  | -4.21240 | -3.03176 |
| H  | -0.34387 | 0.83289  | 1.47271  |
| Co | -0.02495 | 0.12843  | 0.26655  |

### TSA3

EE = -1917.908672

EE + ZPE = -1917.306131

G° = -1917.370184

Imaginary Freq = -1265.98

|   |          |          |          |
|---|----------|----------|----------|
| P | -1.98748 | -1.11557 | -0.09932 |
| P | 1.29330  | 1.72958  | 0.38069  |
| C | -2.90887 | -0.08991 | -1.32387 |
| H | -3.98888 | -0.28508 | -1.35352 |
| H | -2.50346 | -0.33103 | -2.31669 |
| C | 0.15950  | 3.07456  | 0.95568  |
| H | -0.01162 | 2.92442  | 2.02759  |
| H | 0.58923  | 4.07682  | 0.82109  |
| C | -2.58074 | 1.32154  | -0.92044 |
| C | -1.97401 | 3.90720  | -0.10726 |
| C | -3.44244 | 2.37279  | -1.22257 |
| C | -1.38383 | 1.53910  | -0.20665 |
| C | -1.11422 | 2.85975  | 0.19864  |
| C | -3.13901 | 3.66552  | -0.82340 |
| H | -4.35818 | 2.17657  | -1.77729 |
| H | -3.81192 | 4.48334  | -1.06414 |
| H | -1.73319 | 4.91845  | 0.21535  |
| C | -3.10481 | -1.10294 | 1.38668  |
| H | -3.37304 | -0.03585 | 1.42887  |
| C | -2.32724 | -1.43750 | 2.65252  |
| H | -1.45120 | -0.78905 | 2.75557  |
| H | -1.97596 | -2.47524 | 2.65081  |
| H | -2.96416 | -1.30473 | 3.53502  |
| C | -4.38211 | -1.92062 | 1.27420  |
| H | -4.94665 | -1.70126 | 0.36201  |
| H | -5.03833 | -1.70329 | 2.12545  |
| H | -4.17401 | -2.99613 | 1.29619  |
| C | -1.85865 | -2.81992 | -0.83457 |
| H | -1.03504 | -2.67090 | -1.55222 |
| C | -1.39358 | -3.85265 | 0.18508  |
| H | -1.15174 | -4.79295 | -0.32366 |
| H | -2.18198 | -4.07493 | 0.91396  |
| H | -0.50302 | -3.51377 | 0.72192  |
| C | -3.08121 | -3.30404 | -1.60247 |
| H | -3.41037 | -2.59264 | -2.36600 |
| H | -3.92755 | -3.50035 | -0.93705 |
| H | -2.84531 | -4.24594 | -2.11231 |
| C | 2.04722  | 2.53193  | -1.14080 |
| H | 2.24178  | 3.56988  | -0.82564 |
| C | 3.36591  | 1.90734  | -1.57151 |
| H | 3.24523  | 0.84835  | -1.82521 |
| H | 4.14446  | 1.98415  | -0.80729 |
| H | 3.73568  | 2.42076  | -2.46686 |
| C | 1.06520  | 2.54405  | -2.30489 |
| H | 0.12891  | 3.05771  | -2.07034 |
| H | 0.80941  | 1.51984  | -2.60391 |
| H | 1.52223  | 3.04198  | -3.16849 |
| C | 2.71218  | 1.78382  | 1.60078  |
| H | 3.33091  | 2.64243  | 1.29651  |
| C | 3.54874  | 0.51060  | 1.55625  |
| H | 4.45456  | 0.63665  | 2.16057  |
| H | 3.85311  | 0.20999  | 0.54983  |
| H | 2.98555  | -0.32737 | 1.98310  |
| C | 2.22815  | 2.01360  | 3.02677  |
| H | 3.06372  | 1.88942  | 3.72527  |
| H | 1.46050  | 1.27954  | 3.30656  |
| H | 1.81556  | 3.01382  | 3.18139  |
| O | 0.82462  | -1.59833 | 0.62889  |
| C | 1.95906  | -1.95424 | 0.02017  |

|    |          |          |          |
|----|----------|----------|----------|
| C  | 4.31842  | -2.80435 | -1.23423 |
| C  | 2.85919  | -2.79604 | 0.68534  |
| C  | 2.24907  | -1.56839 | -1.29268 |
| C  | 3.42009  | -1.98847 | -1.90781 |
| C  | 4.02372  | -3.21030 | 0.06380  |
| H  | 2.62067  | -3.10105 | 1.70088  |
| H  | 1.52735  | -0.94073 | -1.81382 |
| H  | 3.62897  | -1.67669 | -2.92815 |
| H  | 4.71382  | -3.85785 | 0.59762  |
| H  | 5.23354  | -3.13078 | -1.71755 |
| H  | 0.61981  | -0.43343 | 1.31235  |
| Co | -0.15252 | 0.08403  | 0.12718  |

**Reaction between (PCP)Co and 1 along pathway B**

**B2**

EE = -2302.639011

EE + ZPE = -2301.888926

G° = -2301.963932

|   |          |          |          |
|---|----------|----------|----------|
| P | -2.60922 | -0.67250 | -0.31595 |
| P | 0.70305  | 1.91993  | 0.67744  |
| C | -3.49809 | 0.44348  | -1.48539 |
| H | -3.11080 | 0.22351  | -2.48907 |
| H | -4.58684 | 0.30776  | -1.51214 |
| C | -0.36802 | 3.37249  | 1.04657  |
| H | 0.13616  | 4.34027  | 0.92139  |
| H | -0.64680 | 3.29138  | 2.10711  |
| C | -3.09330 | 1.81562  | -1.03132 |
| C | -2.38156 | 4.32200  | -0.10584 |
| C | -1.89322 | 1.92385  | -0.29137 |
| C | -3.90145 | 2.91620  | -1.29992 |
| C | -3.54259 | 4.17811  | -0.85122 |
| C | -1.58445 | 3.21896  | 0.18184  |
| H | -4.81882 | 2.78131  | -1.87171 |
| H | -4.16663 | 5.03963  | -1.07102 |
| H | -2.09585 | 5.30338  | 0.27076  |
| C | -3.54564 | -0.51555 | 1.30242  |
| H | -3.03754 | 0.35049  | 1.74720  |
| C | -3.27025 | -1.71591 | 2.19762  |
| H | -3.76167 | -2.62673 | 1.83565  |
| H | -3.64677 | -1.52701 | 3.21007  |
| H | -2.19682 | -1.92481 | 2.27439  |
| C | -5.02701 | -0.18215 | 1.21364  |
| H | -5.61094 | -0.96586 | 0.72099  |
| H | -5.19767 | 0.75752  | 0.67874  |
| H | -5.43602 | -0.05874 | 2.22446  |
| C | -3.00043 | -2.38885 | -0.96727 |
| H | -2.44763 | -3.06697 | -0.30061 |
| C | -4.46882 | -2.79279 | -0.97131 |
| H | -4.58417 | -3.77759 | -1.44230 |
| H | -5.07511 | -2.08647 | -1.55136 |
| H | -4.89647 | -2.85926 | 0.03172  |
| C | 1.97466  | 2.53664  | -0.54658 |
| H | 2.60392  | 1.64968  | -0.71189 |
| C | 1.25963  | 2.86515  | -1.85246 |
| H | 1.98930  | 3.04904  | -2.65148 |
| H | 0.64476  | 3.76813  | -1.75029 |
| H | 0.58571  | 2.05903  | -2.16333 |
| C | 2.87613  | 3.68688  | -0.12542 |
| H | 3.48345  | 4.01597  | -0.97899 |

|    |          |          |          |
|----|----------|----------|----------|
| H  | 3.56746  | 3.40986  | 0.67524  |
| H  | 2.29898  | 4.55746  | 0.20975  |
| C  | 1.62725  | 1.62426  | 2.27988  |
| H  | 0.86934  | 1.07289  | 2.86051  |
| C  | 2.81475  | 0.70394  | 2.04532  |
| H  | 3.62941  | 1.22566  | 1.52829  |
| H  | 2.54841  | -0.16284 | 1.43235  |
| H  | 3.22066  | 0.33563  | 2.99620  |
| C  | 2.02694  | 2.84711  | 3.09527  |
| H  | 2.78826  | 3.44863  | 2.59049  |
| H  | 2.45165  | 2.52796  | 4.05558  |
| H  | 1.17837  | 3.50092  | 3.31579  |
| O  | 0.79115  | -1.18075 | -0.16220 |
| C  | 0.51181  | -2.33383 | 0.53669  |
| C  | -0.09495 | -4.54347 | 2.11168  |
| C  | 0.19673  | -3.54428 | -0.06676 |
| C  | 0.53196  | -2.22559 | 1.92348  |
| C  | 0.23160  | -3.32844 | 2.70338  |
| C  | -0.10809 | -4.64244 | 0.73023  |
| H  | 0.16842  | -3.64099 | -1.14705 |
| H  | 0.76889  | -1.26432 | 2.36838  |
| H  | 0.24591  | -3.23538 | 3.78492  |
| H  | -0.36008 | -5.58517 | 0.25401  |
| H  | -0.33315 | -5.40597 | 2.72498  |
| C  | 1.20526  | -1.27833 | -1.52029 |
| H  | 0.44650  | -1.78189 | -2.12943 |
| H  | 1.27290  | -0.24321 | -1.87073 |
| C  | 2.54049  | -1.98630 | -1.71609 |
| H  | 2.49447  | -2.98349 | -1.24746 |
| O  | 2.62979  | -2.10022 | -3.12250 |
| H  | 3.50978  | -2.41728 | -3.34092 |
| C  | 3.71110  | -1.24688 | -1.12667 |
| C  | 5.89319  | 0.11644  | -0.05480 |
| C  | 4.33632  | -1.71264 | 0.02447  |
| C  | 4.19269  | -0.09318 | -1.74263 |
| C  | 5.27590  | 0.58708  | -1.20751 |
| C  | 5.42286  | -1.03502 | 0.55992  |
| H  | 3.96265  | -2.61499 | 0.50535  |
| H  | 3.71051  | 0.26495  | -2.64993 |
| H  | 5.64186  | 1.48779  | -1.69184 |
| H  | 5.90359  | -1.40715 | 1.45951  |
| H  | 6.74458  | 0.64650  | 0.36104  |
| C  | -2.43815 | -2.53426 | -2.37673 |
| H  | -1.43698 | -2.10351 | -2.47899 |
| H  | -3.08136 | -2.02852 | -3.10633 |
| H  | -2.38736 | -3.59051 | -2.66795 |
| Co | -0.71130 | 0.41222  | -0.04228 |

# TSB1

EE = -2302.593518

EE + ZPE = -2301.847332

G° = -2301.920507

Imaginary Freq = -538.91

|   |          |         |          |
|---|----------|---------|----------|
| P | -2.49072 | 0.40350 | -0.48480 |
| P | 1.48449  | 1.08727 | 1.11722  |
| C | 0.99445  | 2.82156 | 1.52452  |
| H | 1.84471  | 3.49158 | 1.70946  |
| H | 0.41269  | 2.76878 | 2.45693  |
| C | -1.48677 | 2.68579 | -1.29584 |
| C | -0.01446 | 4.60670 | 0.05101  |
| C | -0.58426 | 2.25844 | -0.30072 |
| C | -1.62472 | 4.02870 | -1.62934 |

|   |          |          |          |
|---|----------|----------|----------|
| C | -0.87284 | 4.99156  | -0.96942 |
| C | 0.11730  | 3.26391  | 0.39073  |
| H | -2.33042 | 4.32465  | -2.40382 |
| H | -0.97234 | 6.04020  | -1.23436 |
| H | 0.55305  | 5.35948  | 0.59624  |
| C | -3.47950 | 1.33651  | 0.79886  |
| H | -2.94163 | 2.29476  | 0.80761  |
| C | -3.30838 | 0.71640  | 2.17919  |
| H | -3.77160 | -0.27415 | 2.25200  |
| H | -3.77154 | 1.35562  | 2.94056  |
| H | -2.24445 | 0.60723  | 2.42198  |
| C | -4.93591 | 1.62817  | 0.47328  |
| H | -5.55627 | 0.72583  | 0.48782  |
| H | -5.05450 | 2.10975  | -0.50299 |
| H | -5.34929 | 2.31303  | 1.22374  |
| C | -3.55757 | -0.98339 | -1.16546 |
| H | -2.82408 | -1.61658 | -1.68999 |
| C | -4.17431 | -1.83303 | -0.06201 |
| H | -4.58620 | -2.75671 | -0.48561 |
| H | -4.99889 | -1.30808 | 0.43225  |
| H | -3.44573 | -2.12105 | 0.70134  |
| C | 3.12457  | 1.27171  | 0.25339  |
| H | 3.34034  | 0.25519  | -0.09293 |
| C | 2.93963  | 2.15879  | -0.97221 |
| H | 3.84566  | 2.12895  | -1.58959 |
| H | 2.76449  | 3.20357  | -0.68918 |
| H | 2.09383  | 1.84408  | -1.59194 |
| C | 4.30329  | 1.75466  | 1.08382  |
| H | 5.17172  | 1.90492  | 0.42898  |
| H | 4.59959  | 1.03336  | 1.85053  |
| H | 4.09878  | 2.71408  | 1.57517  |
| C | 1.77591  | 0.29198  | 2.78208  |
| H | 0.73362  | 0.14521  | 3.11283  |
| C | 2.41370  | -1.08082 | 2.62839  |
| H | 3.45224  | -1.00039 | 2.28381  |
| H | 1.86639  | -1.69549 | 1.90675  |
| H | 2.42672  | -1.60556 | 3.59128  |
| C | 2.47896  | 1.12437  | 3.84637  |
| H | 3.54347  | 1.25194  | 3.63274  |
| H | 2.40344  | 0.61723  | 4.81625  |
| H | 2.03886  | 2.11928  | 3.96354  |
| O | 0.15819  | -1.55829 | 0.19221  |
| C | -0.69112 | -2.51624 | 0.60908  |
| C | -2.29773 | -4.56183 | 1.66663  |
| C | -1.14778 | -3.55707 | -0.20545 |
| C | -1.07705 | -2.50436 | 1.95589  |
| C | -1.85891 | -3.52044 | 2.47688  |
| C | -1.94219 | -4.56464 | 0.32709  |
| H | -0.89439 | -3.58306 | -1.26019 |
| H | -0.73602 | -1.68062 | 2.57721  |
| H | -2.13448 | -3.49516 | 3.52748  |
| H | -2.28618 | -5.36398 | -0.32337 |
| H | -2.91317 | -5.35649 | 2.07519  |
| C | 0.18578  | -1.02454 | -1.56391 |
| H | -0.79518 | -1.32643 | -1.92653 |
| H | 0.44952  | 0.00870  | -1.85635 |
| C | 1.22630  | -2.01020 | -2.06169 |
| H | 0.97906  | -3.01284 | -1.68402 |
| O | 1.03410  | -1.96291 | -3.46802 |
| H | 1.69965  | -2.52396 | -3.87646 |
| C | 2.65762  | -1.73458 | -1.68330 |
| C | 5.34725  | -1.34239 | -1.04993 |

|    |          |          |          |
|----|----------|----------|----------|
| C  | 3.22910  | -2.38671 | -0.59423 |
| C  | 3.44756  | -0.88674 | -2.45516 |
| C  | 4.78570  | -0.69311 | -2.14094 |
| C  | 4.56426  | -2.18912 | -0.27502 |
| H  | 2.61461  | -3.05807 | 0.00204  |
| H  | 3.00355  | -0.38333 | -3.30998 |
| H  | 5.39308  | -0.03160 | -2.75217 |
| H  | 4.99853  | -2.70660 | 0.57555  |
| H  | 6.39532  | -1.19484 | -0.80747 |
| C  | -4.60709 | -0.56753 | -2.18841 |
| H  | -4.17106 | -0.05583 | -3.05096 |
| H  | -5.36622 | 0.09033  | -1.75377 |
| H  | -5.12595 | -1.45848 | -2.56367 |
| Co | -0.33091 | 0.36755  | 0.06579  |
| C  | -2.38047 | 1.62759  | -1.87201 |
| H  | -3.34426 | 2.02670  | -2.21124 |
| H  | -1.92134 | 1.09858  | -2.72175 |

### B3

EE = -2302.656725

EE + ZPE = -2301.907954

G° = -2301.980527

|   |          |          |          |
|---|----------|----------|----------|
| P | 1.18586  | 1.36362  | 0.67715  |
| P | -2.16758 | -1.46330 | -0.21297 |
| C | 1.91941  | 0.26432  | 1.96138  |
| H | 2.57097  | -0.43615 | 1.42518  |
| H | 2.54482  | 0.78693  | 2.69256  |
| C | -2.75408 | -1.42635 | 1.53510  |
| H | -3.32716 | -2.31656 | 1.82533  |
| H | -3.43540 | -0.56735 | 1.62230  |
| C | 0.74428  | -0.42940 | 2.58521  |
| C | -1.50569 | -1.59784 | 3.71476  |
| C | -0.38224 | -0.65193 | 1.76716  |
| C | 0.74406  | -0.79334 | 3.92707  |
| C | -0.37642 | -1.38994 | 4.49022  |
| C | -1.51790 | -1.22601 | 2.37247  |
| H | 1.62515  | -0.60523 | 4.53825  |
| H | -0.37185 | -1.68070 | 5.53658  |
| H | -2.39244 | -2.04908 | 4.15646  |
| C | 0.62111  | 2.87602  | 1.62742  |
| H | -0.38452 | 2.58042  | 1.95873  |
| C | 0.47338  | 4.09044  | 0.71933  |
| H | 1.45146  | 4.50821  | 0.45455  |
| H | -0.08588 | 4.87417  | 1.24275  |
| H | -0.07221 | 3.86551  | -0.20228 |
| C | 1.44118  | 3.21028  | 2.86551  |
| H | 2.48928  | 3.42037  | 2.62508  |
| H | 1.41175  | 2.41126  | 3.61236  |
| H | 1.02893  | 4.11055  | 3.33679  |
| C | 2.60668  | 1.78386  | -0.44146 |
| H | 2.95542  | 0.77614  | -0.71258 |
| C | 3.77416  | 2.49689  | 0.22451  |
| H | 4.60993  | 2.56813  | -0.48250 |
| H | 4.13994  | 1.96285  | 1.10849  |
| H | 3.51319  | 3.51823  | 0.52349  |
| C | -1.80505 | -3.25970 | -0.55534 |
| H | -1.15076 | -3.25004 | -1.43635 |
| C | -1.01644 | -3.88236 | 0.59178  |
| H | -0.65171 | -4.86696 | 0.27871  |
| H | -1.64885 | -4.02888 | 1.47576  |
| H | -0.15585 | -3.28446 | 0.89711  |
| C | -3.02982 | -4.11569 | -0.84804 |

|    |          |          |          |
|----|----------|----------|----------|
| H  | -2.71768 | -5.16093 | -0.96015 |
| H  | -3.54135 | -3.82831 | -1.76931 |
| H  | -3.75653 | -4.08361 | -0.02687 |
| C  | -3.58453 | -0.89468 | -1.26772 |
| H  | -3.59783 | 0.17998  | -1.03002 |
| C  | -3.22556 | -1.02281 | -2.74319 |
| H  | -3.14285 | -2.07058 | -3.05678 |
| H  | -2.28249 | -0.51093 | -2.95772 |
| H  | -4.00686 | -0.56006 | -3.35693 |
| C  | -4.96717 | -1.44793 | -0.94715 |
| H  | -5.09474 | -2.47981 | -1.28337 |
| H  | -5.72213 | -0.84381 | -1.46407 |
| H  | -5.19961 | -1.41009 | 0.12238  |
| O  | -0.94161 | 1.02881  | -1.69344 |
| C  | -1.66872 | 2.06941  | -1.39990 |
| C  | -3.17770 | 4.37507  | -0.73241 |
| C  | -2.29257 | 2.21536  | -0.13916 |
| C  | -1.85450 | 3.11947  | -2.32465 |
| C  | -2.59380 | 4.23860  | -1.99134 |
| C  | -3.01757 | 3.35161  | 0.19027  |
| H  | -2.19830 | 1.41054  | 0.60074  |
| H  | -1.38667 | 3.02085  | -3.30082 |
| H  | -2.71545 | 5.03063  | -2.72634 |
| H  | -3.46942 | 3.43072  | 1.17629  |
| H  | -3.75443 | 5.25960  | -0.48314 |
| C  | 0.68924  | -0.99356 | -1.25424 |
| H  | 0.01008  | -1.42325 | -1.99714 |
| H  | 1.21865  | -0.18085 | -1.75512 |
| C  | 1.63754  | -2.08417 | -0.77916 |
| H  | 1.52425  | -2.24758 | 0.30732  |
| O  | 1.27304  | -3.27835 | -1.47507 |
| H  | 1.87997  | -3.97293 | -1.20361 |
| C  | 3.09378  | -1.76989 | -1.04646 |
| C  | 5.76765  | -1.12252 | -1.54209 |
| C  | 4.04882  | -1.87692 | -0.04181 |
| C  | 3.50630  | -1.38227 | -2.32212 |
| C  | 4.82895  | -1.05459 | -2.56703 |
| C  | 5.37812  | -1.54588 | -0.28168 |
| H  | 3.74605  | -2.21671 | 0.94723  |
| H  | 2.77038  | -1.32797 | -3.12040 |
| H  | 5.13393  | -0.74335 | -3.56175 |
| H  | 6.10844  | -1.62176 | 0.51831  |
| H  | 6.80290  | -0.85683 | -1.73278 |
| C  | 2.16298  | 2.47351  | -1.72792 |
| H  | 2.95815  | 2.38914  | -2.47899 |
| H  | 1.97293  | 3.53994  | -1.56940 |
| H  | 1.24825  | 2.03092  | -2.13900 |
| Co | -0.49573 | 0.03180  | -0.05577 |

### TSB2

EE = -2302.634573

EE + ZPE = -2301.887053

G° = -2301.958985

Imaginary Freq = -136.75

|   |          |          |          |
|---|----------|----------|----------|
| P | 1.35206  | 1.55329  | 0.30430  |
| P | -1.79280 | -1.59831 | -0.00094 |
| C | 1.84625  | 1.03777  | 2.00858  |
| H | 2.56946  | 0.21821  | 1.88859  |
| H | 2.34577  | 1.82322  | 2.58670  |
| C | -2.70132 | -0.92097 | 1.45911  |
| H | -3.34253 | -1.66188 | 1.95096  |
| H | -3.35107 | -0.11523 | 1.09631  |

|   |          |          |          |
|---|----------|----------|----------|
| C | 0.56685  | 0.56499  | 2.64078  |
| C | -1.84248 | -0.27349 | 3.74002  |
| C | -0.42317 | 0.04484  | 1.78612  |
| C | 0.35158  | 0.66845  | 4.01189  |
| C | -0.85119 | 0.24553  | 4.56055  |
| C | -1.63490 | -0.37465 | 2.36687  |
| H | 1.12746  | 1.08015  | 4.65497  |
| H | -1.01838 | 0.32533  | 5.63084  |
| H | -2.78819 | -0.59709 | 4.17086  |
| C | 0.51713  | 3.19981  | 0.55844  |
| H | -0.47094 | 2.89449  | 0.92231  |
| C | 0.31139  | 3.94812  | -0.75323 |
| H | 1.23420  | 4.44530  | -1.07397 |
| H | -0.44840 | 4.72538  | -0.61390 |
| H | -0.03344 | 3.29050  | -1.55642 |
| C | 1.14130  | 4.09688  | 1.61792  |
| H | 2.17061  | 4.37999  | 1.37359  |
| H | 1.13658  | 3.63634  | 2.61058  |
| H | 0.55879  | 5.02322  | 1.68916  |
| C | 2.96350  | 1.77016  | -0.60098 |
| H | 3.33007  | 0.73457  | -0.59622 |
| C | 4.01539  | 2.62314  | 0.09338  |
| H | 4.97126  | 2.52352  | -0.43675 |
| H | 4.18551  | 2.32195  | 1.13217  |
| H | 3.74859  | 3.68574  | 0.08234  |
| C | -1.46790 | -3.36678 | 0.51115  |
| H | -0.95975 | -3.80120 | -0.35777 |
| C | -0.52213 | -3.45437 | 1.70412  |
| H | -0.28231 | -4.50649 | 1.90159  |
| H | -0.97807 | -3.04484 | 2.61294  |
| H | 0.41651  | -2.91511 | 1.54709  |
| C | -2.73449 | -4.15958 | 0.81215  |
| H | -2.47071 | -5.20259 | 1.02511  |
| H | -3.44927 | -4.16570 | -0.01373 |
| H | -3.24939 | -3.77589 | 1.70026  |
| C | -2.92512 | -1.66827 | -1.47892 |
| H | -2.63871 | -0.75243 | -2.01157 |
| C | -2.59621 | -2.83851 | -2.39993 |
| H | -2.94507 | -3.79637 | -1.99983 |
| H | -1.52273 | -2.93066 | -2.59627 |
| H | -3.09560 | -2.69028 | -3.36377 |
| C | -4.41099 | -1.57919 | -1.16292 |
| H | -4.75887 | -2.40891 | -0.53627 |
| H | -4.98499 | -1.60860 | -2.09683 |
| H | -4.66347 | -0.63923 | -0.66215 |
| O | -0.96604 | 0.94215  | -1.56359 |
| C | -2.10303 | 1.58456  | -1.40548 |
| C | -4.55824 | 2.99579  | -1.26677 |
| C | -2.66134 | 1.96838  | -0.17264 |
| C | -2.82176 | 1.93803  | -2.56822 |
| C | -4.01584 | 2.62984  | -2.49568 |
| C | -3.86547 | 2.65840  | -0.11367 |
| H | -2.13380 | 1.71625  | 0.74209  |
| H | -2.39740 | 1.64698  | -3.52580 |
| H | -4.53755 | 2.88492  | -3.41488 |
| H | -4.26321 | 2.93918  | 0.85908  |
| H | -5.49777 | 3.53600  | -1.21309 |
| C | 0.79451  | -0.94729 | -1.75473 |
| H | 0.09241  | -1.45463 | -2.41673 |
| H | 1.36704  | -0.19616 | -2.29447 |
| C | 1.56404  | -1.86158 | -0.87853 |
| H | 1.22085  | -1.60899 | 0.18979  |

|    |          |          |          |
|----|----------|----------|----------|
| O  | 1.20683  | -3.21134 | -1.13600 |
| H  | 1.67555  | -3.76772 | -0.50529 |
| C  | 3.06514  | -1.70157 | -0.83778 |
| C  | 5.83538  | -1.38997 | -0.71862 |
| C  | 3.73629  | -1.78130 | 0.37875  |
| C  | 3.80270  | -1.50880 | -2.00304 |
| C  | 5.17833  | -1.34718 | -1.94300 |
| C  | 5.11399  | -1.61924 | 0.44404  |
| H  | 3.16301  | -1.94900 | 1.29103  |
| H  | 3.28321  | -1.46614 | -2.95672 |
| H  | 5.74352  | -1.18312 | -2.85560 |
| H  | 5.62277  | -1.66738 | 1.40197  |
| H  | 6.91134  | -1.25288 | -0.67353 |
| C  | 2.79396  | 2.18672  | -2.05861 |
| H  | 3.68542  | 1.89865  | -2.62882 |
| H  | 2.68279  | 3.27108  | -2.15216 |
| H  | 1.92230  | 1.72706  | -2.53427 |
| Co | -0.11005 | -0.10935 | -0.20051 |

# **Reaction between (PCP)Co and 1 along pathway**

**C**

**C2**

EE = -2301.446401

EE + ZPE = -2300.720163

G° = -2300.795873

|   |          |          |          |
|---|----------|----------|----------|
| P | 0.20885  | -1.85782 | -1.22397 |
| P | 2.25447  | 1.46868  | 0.59403  |
| C | 1.64812  | -2.89391 | -1.71640 |
| H | 1.70093  | -2.86774 | -2.81393 |
| H | 1.54216  | -3.94974 | -1.43252 |
| C | 3.96520  | 1.18112  | -0.01247 |
| H | 4.08749  | 1.78924  | -0.92007 |
| H | 4.75249  | 1.47859  | 0.69254  |
| C | 2.76538  | -0.89911 | -0.69526 |
| C | 5.24687  | -2.30760 | -0.72219 |
| C | 2.87093  | -2.23646 | -1.14299 |
| C | 3.99334  | -0.28213 | -0.35032 |
| C | 5.20002  | -0.97390 | -0.34614 |
| C | 4.07913  | -2.92713 | -1.13894 |
| H | 6.11369  | -0.45884 | -0.05307 |
| H | 4.10508  | -3.96199 | -1.47796 |
| H | 6.18659  | -2.85213 | -0.70952 |
| O | -0.38886 | 1.21952  | -0.91914 |
| C | -1.46402 | 1.54663  | -0.39770 |
| C | -2.26470 | 2.62681  | -0.96887 |
| C | -3.70639 | 4.74817  | -2.06150 |
| C | -1.78565 | 3.30495  | -2.09683 |
| C | -3.47852 | 3.02585  | -0.39922 |
| C | -4.19128 | 4.08057  | -0.94518 |
| C | -2.50193 | 4.35576  | -2.63646 |
| H | -0.84293 | 2.98752  | -2.53071 |
| H | -3.87477 | 2.49373  | 0.45938  |
| H | -5.13336 | 4.38228  | -0.49843 |
| H | -2.12271 | 4.87667  | -3.51008 |
| H | -4.26767 | 5.57466  | -2.48619 |
| C | -1.89089 | 0.84015  | 0.86293  |
| H | -1.98805 | 1.55085  | 1.70317  |
| H | -1.08689 | 0.12913  | 1.09556  |
| O | -3.11362 | 0.16596  | 0.63333  |
| C | -3.41154 | -0.88182 | 1.44893  |
| C | -4.09723 | -3.13134 | 2.93731  |
| C | -2.77756 | -1.12816 | 2.66243  |

|    |          |          |          |
|----|----------|----------|----------|
| C  | -4.40046 | -1.74902 | 0.98846  |
| C  | -4.73772 | -2.86526 | 1.73135  |
| C  | -3.12560 | -2.25748 | 3.39534  |
| H  | -2.01294 | -0.45830 | 3.04162  |
| H  | -4.87755 | -1.52811 | 0.03849  |
| H  | -5.50378 | -3.54007 | 1.36185  |
| H  | -2.62272 | -2.44877 | 4.33851  |
| H  | -4.35874 | -4.01193 | 3.51434  |
| C  | -0.96940 | -1.96840 | -2.67392 |
| H  | -0.51168 | -1.24860 | -3.37032 |
| C  | -1.07519 | -3.30839 | -3.39100 |
| H  | -0.10018 | -3.71315 | -3.67702 |
| H  | -1.66008 | -3.18721 | -4.31137 |
| H  | -1.58386 | -4.06168 | -2.78304 |
| C  | -2.34716 | -1.44009 | -2.29640 |
| H  | -2.99173 | -1.39382 | -3.18217 |
| H  | -2.30791 | -0.43665 | -1.86294 |
| H  | -2.84145 | -2.09480 | -1.56775 |
| C  | -0.57681 | -2.79136 | 0.19449  |
| H  | -1.39829 | -2.14028 | 0.52573  |
| C  | -1.16237 | -4.16250 | -0.10772 |
| H  | -0.42812 | -4.82719 | -0.57971 |
| H  | -2.04256 | -4.11026 | -0.75409 |
| H  | -1.47791 | -4.63995 | 0.82877  |
| C  | 0.43863  | -2.88495 | 1.32783  |
| H  | 1.23673  | -3.59715 | 1.08431  |
| H  | -0.05192 | -3.23346 | 2.24516  |
| H  | 0.92010  | -1.92056 | 1.52165  |
| C  | 2.43281  | 0.99662  | 2.39686  |
| H  | 2.94482  | 0.02674  | 2.28944  |
| C  | 1.09299  | 0.73676  | 3.07076  |
| H  | 0.50845  | 0.00084  | 2.51049  |
| H  | 0.49575  | 1.65284  | 3.15975  |
| H  | 1.24570  | 0.34756  | 4.08484  |
| C  | 3.30187  | 1.90561  | 3.25341  |
| H  | 4.27116  | 2.12270  | 2.79450  |
| H  | 3.49899  | 1.42929  | 4.22158  |
| H  | 2.80305  | 2.85907  | 3.46205  |
| C  | 1.98689  | 3.31656  | 0.45757  |
| H  | 1.73328  | 3.40323  | -0.61133 |
| C  | 0.77667  | 3.78431  | 1.25644  |
| H  | -0.11124 | 3.17143  | 1.06971  |
| H  | 0.52114  | 4.81718  | 0.99168  |
| H  | 0.97804  | 3.76743  | 2.33397  |
| C  | 3.19141  | 4.20716  | 0.73033  |
| H  | 4.06822  | 3.91398  | 0.14601  |
| H  | 3.47421  | 4.19934  | 1.78739  |
| H  | 2.95347  | 5.24526  | 0.46621  |
| Co | 1.07306  | 0.06696  | -0.61446 |

# TSC1/t

EE = -2301.430666

EE + ZPE = -2300.704601

G° = -2300.777515

Imaginary Freq = -511.65

|   |          |          |          |
|---|----------|----------|----------|
| P | -2.00861 | -1.42056 | -0.34293 |
| P | 1.89629  | -0.03791 | 1.18439  |
| C | -1.43109 | -2.94020 | -1.23568 |
| H | -1.43080 | -2.66140 | -2.30008 |
| H | -2.12239 | -3.78714 | -1.12634 |
| C | 2.97058  | -1.42452 | 0.58199  |
| H | 3.57452  | -1.01734 | -0.24354 |

|   |          |          |          |
|---|----------|----------|----------|
| H | 3.67735  | -1.76043 | 1.35336  |
| C | 0.76344  | -2.23983 | -0.26768 |
| C | 1.77984  | -4.84742 | -0.54797 |
| C | -0.02543 | -3.27259 | -0.79881 |
| C | 2.08778  | -2.54352 | 0.08333  |
| C | 2.58877  | -3.83782 | -0.04504 |
| C | 0.47470  | -4.56463 | -0.93250 |
| H | 3.61343  | -4.06175 | 0.25012  |
| H | -0.15413 | -5.35823 | -1.33470 |
| H | 2.16709  | -5.85836 | -0.64223 |
| O | -0.40315 | 0.09679  | -2.96365 |
| C | 0.02157  | 1.10243  | -2.43074 |
| C | 1.47686  | 1.39200  | -2.35852 |
| C | 4.21471  | 1.88787  | -2.45941 |
| C | 2.37104  | 0.35171  | -2.62201 |
| C | 1.96745  | 2.67978  | -2.13779 |
| C | 3.33143  | 2.92698  | -2.19867 |
| C | 3.73246  | 0.59812  | -2.66159 |
| H | 1.97018  | -0.64535 | -2.78304 |
| H | 1.28523  | 3.49196  | -1.90684 |
| H | 3.70604  | 3.93310  | -2.03624 |
| H | 4.42303  | -0.21621 | -2.85983 |
| H | 5.28241  | 2.08139  | -2.50257 |
| C | -0.96163 | 2.16820  | -1.97189 |
| H | -1.96697 | 1.73570  | -2.03711 |
| H | -0.91249 | 3.02610  | -2.66455 |
| O | -0.66935 | 2.56916  | -0.64909 |
| C | -1.71315 | 3.00117  | 0.11459  |
| C | -3.77308 | 3.79069  | 1.80582  |
| C | -1.64295 | 2.71812  | 1.47567  |
| C | -2.80494 | 3.68815  | -0.40181 |
| C | -3.83030 | 4.07861  | 0.45126  |
| C | -2.67057 | 3.11268  | 2.31437  |
| H | -0.78162 | 2.16850  | 1.84254  |
| H | -2.86116 | 3.91827  | -1.46111 |
| H | -4.68320 | 4.61383  | 0.04507  |
| H | -2.61316 | 2.87906  | 3.37359  |
| H | -4.58069 | 4.09428  | 2.46366  |
| C | -3.36771 | -0.74704 | -1.43065 |
| H | -2.77008 | -0.23592 | -2.20068 |
| C | -4.26082 | -1.74702 | -2.15342 |
| H | -3.68545 | -2.45593 | -2.75524 |
| H | -4.93206 | -1.21113 | -2.83637 |
| H | -4.88982 | -2.32131 | -1.46742 |
| C | -4.18318 | 0.29067  | -0.67005 |
| H | -4.77710 | 0.90160  | -1.36133 |
| H | -3.55036 | 0.97130  | -0.08729 |
| H | -4.88560 | -0.18465 | 0.02490  |
| C | -2.82500 | -2.04539 | 1.22164  |
| H | -3.11648 | -1.11646 | 1.73853  |
| C | -4.05539 | -2.92375 | 1.05215  |
| H | -3.83998 | -3.80178 | 0.43122  |
| H | -4.89955 | -2.39160 | 0.60679  |
| H | -4.38386 | -3.29632 | 2.03044  |
| C | -1.78902 | -2.76099 | 2.08175  |
| H | -1.47628 | -3.70492 | 1.61939  |
| H | -2.21361 | -2.99434 | 3.06547  |
| H | -0.88487 | -2.16100 | 2.22320  |
| C | 1.64577  | -0.50680 | 2.97901  |
| H | 1.41096  | -1.57894 | 2.87926  |
| C | 0.42384  | 0.19139  | 3.56260  |
| H | -0.46553 | 0.05292  | 2.93291  |

|    |          |          |          |
|----|----------|----------|----------|
| H  | 0.59374  | 1.27110  | 3.66560  |
| H  | 0.19514  | -0.20028 | 4.56135  |
| C  | 2.84592  | -0.36311 | 3.90106  |
| H  | 3.74767  | -0.83447 | 3.49814  |
| H  | 2.63457  | -0.83194 | 4.86993  |
| H  | 3.07227  | 0.69124  | 4.09690  |
| C  | 3.00168  | 1.45218  | 1.03047  |
| H  | 3.02919  | 1.53759  | -0.06396 |
| C  | 2.32450  | 2.70988  | 1.55348  |
| H  | 1.32783  | 2.83914  | 1.11638  |
| H  | 2.91958  | 3.59459  | 1.29272  |
| H  | 2.22572  | 2.69830  | 2.64643  |
| C  | 4.44424  | 1.34286  | 1.50262  |
| H  | 4.93491  | 0.43320  | 1.14127  |
| H  | 4.52878  | 1.36286  | 2.59345  |
| H  | 5.01724  | 2.19638  | 1.11612  |
| Co | -0.03662 | -0.42848 | 0.11653  |

### C3

EE = -2301.464590

EE + ZPE = -2300.737502

G° = -2300.808691

|   |          |          |          |
|---|----------|----------|----------|
| P | 1.08058  | 2.27919  | -0.26460 |
| P | -0.52146 | -1.09691 | 1.35580  |
| C | -0.42747 | 3.28358  | -0.63877 |
| H | -0.57669 | 3.17136  | -1.72087 |
| H | -0.32143 | 4.35357  | -0.41820 |
| C | -2.34309 | -0.79793 | 1.40918  |
| H | -2.79695 | -1.39990 | 0.60932  |
| H | -2.81203 | -1.09284 | 2.35581  |
| C | -1.46753 | 1.26934  | 0.37442  |
| C | -3.69178 | 2.74856  | 1.23371  |
| C | -1.56242 | 2.64169  | 0.10240  |
| C | -2.49197 | 0.66308  | 1.11155  |
| C | -3.59430 | 1.39882  | 1.53685  |
| C | -2.67105 | 3.36815  | 0.52432  |
| H | -4.38061 | 0.90797  | 2.10752  |
| H | -2.72940 | 4.43305  | 0.30450  |
| H | -4.55202 | 3.32262  | 1.56546  |
| O | -0.42736 | 0.63077  | -2.20079 |
| C | -0.78409 | -0.59237 | -1.94419 |
| C | -2.20126 | -1.00226 | -1.98084 |
| C | -4.92608 | -1.67275 | -1.92643 |
| C | -3.18654 | -0.01247 | -2.06218 |
| C | -2.61322 | -2.33797 | -1.90675 |
| C | -3.96048 | -2.66832 | -1.87859 |
| C | -4.52893 | -0.34412 | -2.02488 |
| H | -2.87056 | 1.02358  | -2.13198 |
| H | -1.88067 | -3.13999 | -1.86061 |
| H | -4.25601 | -3.71206 | -1.81939 |
| H | -5.27509 | 0.44399  | -2.06905 |
| H | -5.98034 | -1.93042 | -1.89820 |
| C | 0.32677  | -1.58900 | -2.20158 |
| H | 0.64662  | -1.60411 | -3.25362 |
| H | 0.09811  | -2.60988 | -1.87423 |
| O | 1.38620  | -1.06041 | -1.38513 |
| C | 2.46503  | -1.82389 | -1.07324 |
| C | 4.70504  | -3.27886 | -0.29801 |
| C | 3.28632  | -1.34987 | -0.05299 |
| C | 2.76206  | -3.02261 | -1.71048 |
| C | 3.88271  | -3.74249 | -1.31168 |
| C | 4.40190  | -2.07370 | 0.32633  |

|    |          |          |          |
|----|----------|----------|----------|
| H  | 3.00380  | -0.42660 | 0.44595  |
| H  | 2.13740  | -3.39444 | -2.51466 |
| H  | 4.11104  | -4.67976 | -1.80988 |
| H  | 5.03353  | -1.69935 | 1.12637  |
| H  | 5.57649  | -3.84945 | 0.00484  |
| C  | 2.17224  | 2.52664  | -1.75728 |
| H  | 1.69400  | 1.82603  | -2.45817 |
| C  | 2.16570  | 3.90907  | -2.39785 |
| H  | 1.15537  | 4.26903  | -2.61026 |
| H  | 2.70156  | 3.86725  | -3.35423 |
| H  | 2.66785  | 4.65937  | -1.77996 |
| C  | 3.59310  | 2.04765  | -1.49845 |
| H  | 4.17639  | 2.08061  | -2.42601 |
| H  | 3.62176  | 1.01633  | -1.13414 |
| H  | 4.11328  | 2.68111  | -0.76933 |
| C  | 1.88774  | 3.13514  | 1.18938  |
| H  | 2.72192  | 2.46828  | 1.46067  |
| C  | 2.44182  | 4.52881  | 0.93071  |
| H  | 1.67004  | 5.19966  | 0.53452  |
| H  | 3.28127  | 4.52876  | 0.23125  |
| H  | 2.79779  | 4.96824  | 1.87088  |
| C  | 0.90598  | 3.17468  | 2.35495  |
| H  | 0.08864  | 3.87783  | 2.15556  |
| H  | 1.41555  | 3.50836  | 3.26659  |
| H  | 0.45186  | 2.20005  | 2.55171  |
| C  | -0.01090 | -0.58026 | 3.07945  |
| H  | -0.49743 | 0.40714  | 3.13106  |
| C  | 1.49180  | -0.36475 | 3.18933  |
| H  | 1.86109  | 0.25763  | 2.36709  |
| H  | 2.04163  | -1.31261 | 3.16736  |
| H  | 1.73768  | 0.13841  | 4.13256  |
| C  | -0.53877 | -1.41460 | 4.23736  |
| H  | -1.62242 | -1.56029 | 4.19344  |
| H  | -0.31808 | -0.91174 | 5.18685  |
| H  | -0.06430 | -2.40073 | 4.28077  |
| C  | -0.35376 | -2.96258 | 1.22008  |
| H  | -0.39216 | -3.11325 | 0.13024  |
| C  | 0.99008  | -3.48777 | 1.70990  |
| H  | 1.83811  | -2.91640 | 1.32250  |
| H  | 1.12263  | -4.52799 | 1.38912  |
| H  | 1.04669  | -3.47945 | 2.80394  |
| C  | -1.49879 | -3.76342 | 1.82848  |
| H  | -2.46860 | -3.50163 | 1.39609  |
| H  | -1.56178 | -3.62870 | 2.91314  |
| H  | -1.33460 | -4.83252 | 1.64419  |
| Co | 0.00246  | 0.25695  | -0.31824 |

### TSC2

EE = -2301.409002

EE + ZPE = -2300.684602

G° = -2300.755617

Imaginary Freq = -396.51

|   |          |          |          |
|---|----------|----------|----------|
| P | 0.41496  | -2.52259 | -0.05028 |
| P | -0.31567 | 1.66216  | 0.96183  |
| C | 2.24287  | -2.56130 | 0.04802  |
| H | 2.59468  | -2.53187 | -0.99280 |
| H | 2.65088  | -3.46460 | 0.51915  |
| C | 1.41449  | 2.24899  | 1.14385  |
| H | 1.68740  | 2.78025  | 0.22192  |
| H | 1.54780  | 2.95141  | 1.97593  |
| C | 1.75423  | -0.19738 | 0.74901  |
| C | 4.35237  | -0.00945 | 1.87706  |

|   |          |          |          |
|---|----------|----------|----------|
| C | 2.64807  | -1.29191 | 0.74531  |
| C | 2.25057  | 1.00991  | 1.28348  |
| C | 3.51723  | 1.09601  | 1.85336  |
| C | 3.91811  | -1.19667 | 1.30736  |
| H | 3.85688  | 2.04520  | 2.26460  |
| H | 4.57604  | -2.06403 | 1.29153  |
| H | 5.34018  | 0.05651  | 2.32391  |
| O | 1.43542  | -1.03278 | -2.52688 |
| C | 0.87480  | 0.02422  | -2.21707 |
| C | 1.68814  | 1.28517  | -2.11855 |
| C | 3.35799  | 3.53371  | -2.09021 |
| C | 3.05524  | 1.15751  | -1.86681 |
| C | 1.18208  | 2.55640  | -2.39343 |
| C | 2.00940  | 3.67214  | -2.38162 |
| C | 3.87753  | 2.26905  | -1.83575 |
| H | 3.45363  | 0.16607  | -1.67615 |
| H | 0.13546  | 2.69373  | -2.64933 |
| H | 1.59600  | 4.65057  | -2.60871 |
| H | 4.93243  | 2.14907  | -1.60780 |
| H | 4.00561  | 4.40504  | -2.07390 |
| C | -0.59256 | 0.13720  | -2.24975 |
| H | -1.03469 | -0.49852 | -3.01506 |
| H | -1.01489 | 1.13378  | -2.19332 |
| O | -1.70868 | -0.67165 | -0.99024 |
| C | -2.97102 | -0.22652 | -0.92387 |
| C | -5.66552 | 0.53768  | -0.69396 |
| C | -3.57559 | 0.56433  | -1.90768 |
| C | -3.75199 | -0.65173 | 0.15911  |
| C | -5.07776 | -0.27343 | 0.27017  |
| C | -4.90662 | 0.94081  | -1.78086 |
| H | -3.02128 | 0.87773  | -2.78432 |
| H | -3.28754 | -1.29346 | 0.90246  |
| H | -5.65953 | -0.61789 | 1.12064  |
| H | -5.35417 | 1.55763  | -2.55509 |
| H | -6.70436 | 0.83720  | -0.60459 |
| C | -0.11499 | -3.58405 | -1.48115 |
| H | 0.00311  | -2.88047 | -2.31529 |
| C | 0.77523  | -4.78476 | -1.77261 |
| H | 1.81340  | -4.48880 | -1.94992 |
| H | 0.42253  | -5.28855 | -2.68085 |
| H | 0.76648  | -5.52508 | -0.96627 |
| C | -1.58531 | -3.96568 | -1.37016 |
| H | -1.92223 | -4.42280 | -2.30776 |
| H | -2.21545 | -3.09119 | -1.17923 |
| H | -1.76249 | -4.69868 | -0.57436 |
| C | -0.18465 | -3.36628 | 1.50587  |
| H | -1.27991 | -3.26422 | 1.44940  |
| C | 0.16567  | -4.84295 | 1.63136  |
| H | 1.24988  | -5.00141 | 1.58335  |
| H | -0.30059 | -5.46059 | 0.86032  |
| H | -0.17077 | -5.22254 | 2.60398  |
| C | 0.30467  | -2.61414 | 2.73827  |
| H | 1.39013  | -2.71334 | 2.85667  |
| H | -0.16706 | -3.02506 | 3.63873  |
| H | 0.08468  | -1.54428 | 2.68811  |
| C | -0.75034 | 1.38091  | 2.76273  |
| H | 0.13489  | 0.80759  | 3.08120  |
| C | -1.96952 | 0.49019  | 2.94739  |
| H | -1.87989 | -0.42986 | 2.36091  |
| H | -2.89505 | 0.98879  | 2.63885  |
| H | -2.07725 | 0.21167  | 4.00282  |
| C | -0.83695 | 2.62174  | 3.64007  |

|    |          |          |          |
|----|----------|----------|----------|
| H  | 0.03979  | 3.26978  | 3.54849  |
| H  | -0.90885 | 2.32131  | 4.69238  |
| H  | -1.72727 | 3.21878  | 3.41682  |
| C  | -1.29517 | 3.12089  | 0.31500  |
| H  | -1.18870 | 3.00480  | -0.77547 |
| C  | -2.77886 | 3.01486  | 0.64558  |
| H  | -3.18286 | 2.01703  | 0.45315  |
| H  | -3.35118 | 3.72284  | 0.03483  |
| H  | -2.97110 | 3.26476  | 1.69456  |
| C  | -0.74465 | 4.49237  | 0.68305  |
| H  | 0.29250  | 4.62692  | 0.36188  |
| H  | -0.79223 | 4.67399  | 1.76168  |
| H  | -1.34481 | 5.27130  | 0.19659  |
| Co | -0.04395 | -0.33932 | 0.00347  |

#### C4

EE = -2301.472065

EE + ZPE = -2300.745935

G° = -2300.818786

|   |          |          |          |
|---|----------|----------|----------|
| P | -1.08864 | -1.25462 | 0.96130  |
| P | 2.62515  | 0.73890  | -0.58093 |
| C | -0.62963 | -2.96976 | 0.51261  |
| H | -1.07713 | -3.17271 | -0.47046 |
| H | -1.00843 | -3.72152 | 1.21331  |
| C | 3.57904  | -0.76260 | -1.01694 |
| H | 3.53244  | -0.88445 | -2.10882 |
| H | 4.64023  | -0.68912 | -0.75208 |
| C | 1.51211  | -1.80670 | -0.05172 |
| C | 2.94964  | -4.18739 | 0.45609  |
| C | 0.86195  | -2.98036 | 0.38045  |
| C | 2.88653  | -1.91271 | -0.34055 |
| C | 3.59634  | -3.07831 | -0.06256 |
| C | 1.57783  | -4.14118 | 0.65286  |
| H | 4.66475  | -3.11607 | -0.26631 |
| H | 1.04974  | -5.02216 | 1.01251  |
| H | 3.50617  | -5.09226 | 0.68056  |
| O | -0.72102 | -2.35715 | -2.59030 |
| C | -0.83497 | -1.15963 | -2.38788 |
| C | -2.19040 | -0.52675 | -2.46362 |
| C | -4.78279 | 0.49045  | -2.47400 |
| C | -3.26098 | -1.32650 | -2.86647 |
| C | -2.42914 | 0.79330  | -2.08197 |
| C | -3.72259 | 1.29552  | -2.08006 |
| C | -4.54958 | -0.82124 | -2.87437 |
| H | -3.05135 | -2.35220 | -3.15450 |
| H | -1.61034 | 1.40889  | -1.72091 |
| H | -3.90068 | 2.31436  | -1.74793 |
| H | -5.37817 | -1.44909 | -3.18815 |
| H | -5.79481 | 0.88466  | -2.46922 |
| C | 0.33889  | -0.31667 | -2.06899 |
| H | 0.22627  | 0.72363  | -2.39068 |
| H | 1.21669  | -0.78998 | -2.51672 |
| O | -0.04504 | 1.74465  | -0.01065 |
| C | -0.87641 | 2.44389  | 0.71910  |
| C | -2.69074 | 4.01747  | 2.22867  |
| C | -0.97332 | 2.32482  | 2.11970  |
| C | -1.69968 | 3.41579  | 0.11016  |
| C | -2.59029 | 4.17324  | 0.84940  |
| C | -1.86198 | 3.09640  | 2.85327  |
| H | -0.32271 | 1.62047  | 2.63066  |
| H | -1.61118 | 3.55621  | -0.96549 |
| H | -3.21400 | 4.90534  | 0.34197  |

|    |          |          |          |
|----|----------|----------|----------|
| H  | -1.90472 | 2.97404  | 3.93307  |
| H  | -3.38856 | 4.61630  | 2.80454  |
| C  | -2.94488 | -1.14555 | 0.76171  |
| H  | -3.04747 | -0.83915 | -0.28333 |
| C  | -3.68674 | -2.46810 | 0.90570  |
| H  | -3.31212 | -3.23334 | 0.21944  |
| H  | -4.74394 | -2.30590 | 0.66182  |
| H  | -3.64546 | -2.87098 | 1.92335  |
| C  | -3.57456 | -0.04897 | 1.60770  |
| H  | -4.62775 | 0.05976  | 1.32329  |
| H  | -3.09078 | 0.92186  | 1.46195  |
| H  | -3.54824 | -0.28483 | 2.67902  |
| C  | -0.75143 | -1.14531 | 2.80068  |
| H  | -1.30421 | -0.24399 | 3.09945  |
| C  | -1.25970 | -2.32527 | 3.61510  |
| H  | -0.72095 | -3.24520 | 3.35916  |
| H  | -2.32969 | -2.50591 | 3.48346  |
| H  | -1.08606 | -2.13888 | 4.68177  |
| C  | 0.72821  | -0.91294 | 3.09038  |
| H  | 1.33341  | -1.78885 | 2.83118  |
| H  | 0.86878  | -0.70900 | 4.15899  |
| H  | 1.13587  | -0.05918 | 2.53561  |
| C  | 3.46769  | 1.32772  | 0.97338  |
| H  | 3.44934  | 0.40060  | 1.57119  |
| C  | 2.68492  | 2.39995  | 1.71888  |
| H  | 1.63579  | 2.13867  | 1.86072  |
| H  | 2.70218  | 3.35332  | 1.18060  |
| H  | 3.13922  | 2.57055  | 2.70167  |
| C  | 4.91954  | 1.75713  | 0.80396  |
| H  | 5.52349  | 1.04816  | 0.22989  |
| H  | 5.38468  | 1.86075  | 1.79106  |
| H  | 4.98338  | 2.73550  | 0.31604  |
| C  | 2.85259  | 1.93411  | -1.98093 |
| H  | 2.24309  | 1.46247  | -2.76636 |
| C  | 2.24915  | 3.29914  | -1.67391 |
| H  | 1.23969  | 3.20959  | -1.25942 |
| H  | 2.20695  | 3.89889  | -2.59014 |
| H  | 2.86976  | 3.85004  | -0.95752 |
| C  | 4.27520  | 2.05221  | -2.51375 |
| H  | 4.73234  | 1.08177  | -2.73080 |
| H  | 4.92750  | 2.58643  | -1.81748 |
| H  | 4.26315  | 2.62443  | -3.44872 |
| Co | 0.60391  | -0.08767 | -0.12266 |

# C5

EE = -2302.657671

EE + ZPE = -2301.912443

G° = -2301.985082

|   |          |          |          |
|---|----------|----------|----------|
| P | -1.42548 | -1.70400 | 0.07624  |
| P | 2.10449  | 0.91070  | -0.72312 |
| C | -3.22476 | -1.36145 | 0.40655  |
| H | -3.54266 | -0.89802 | -0.53679 |
| C | -0.76782 | -2.95146 | 1.29469  |
| H | 0.31269  | -2.79348 | 1.19863  |
| C | -4.06224 | -2.61961 | 0.60249  |
| H | -3.83274 | -3.12491 | 1.54634  |
| H | -3.93018 | -3.33810 | -0.21258 |
| H | -5.12426 | -2.34906 | 0.62887  |
| C | -3.45200 | -0.35628 | 1.52961  |
| H | -3.12625 | -0.73690 | 2.50268  |
| H | -4.52191 | -0.12796 | 1.60447  |
| H | -2.94013 | 0.59617  | 1.34650  |

|   |          |          |          |
|---|----------|----------|----------|
| C | -1.08543 | -4.40263 | 0.95975  |
| H | -0.62461 | -5.04765 | 1.71729  |
| H | -0.67836 | -4.70451 | -0.00966 |
| H | -2.15998 | -4.61410 | 0.96563  |
| C | -1.14041 | -2.62003 | 2.73408  |
| H | -0.53038 | -3.22724 | 3.41262  |
| H | -2.19045 | -2.84915 | 2.94980  |
| H | -0.94974 | -1.57376 | 2.99009  |
| C | 2.86617  | 1.99279  | 0.58290  |
| H | 2.87303  | 1.30849  | 1.44454  |
| C | 2.01292  | 3.19290  | 0.97109  |
| H | 2.42990  | 3.65808  | 1.87152  |
| H | 0.98367  | 2.90774  | 1.21418  |
| H | 1.98685  | 3.95623  | 0.18637  |
| C | 4.30502  | 2.40116  | 0.29516  |
| H | 4.73090  | 2.88753  | 1.18021  |
| H | 4.37019  | 3.11839  | -0.53057 |
| H | 4.94301  | 1.54473  | 0.05551  |
| C | 2.33845  | 1.66424  | -2.41833 |
| H | 1.60635  | 1.10932  | -3.02015 |
| C | 1.96444  | 3.14106  | -2.46094 |
| H | 2.72340  | 3.76007  | -1.96986 |
| H | 1.00098  | 3.35685  | -1.98697 |
| H | 1.89663  | 3.47625  | -3.50176 |
| C | 3.70540  | 1.43714  | -3.05238 |
| H | 4.51975  | 1.86992  | -2.46215 |
| H | 3.72695  | 1.91669  | -4.03822 |
| H | 3.91626  | 0.37529  | -3.20616 |
| C | 3.14501  | -0.59879 | -0.75114 |
| H | 3.28774  | -0.87609 | 0.30004  |
| H | 4.12533  | -0.45139 | -1.21398 |
| C | -1.34903 | -2.53882 | -1.55613 |
| H | -1.90879 | -1.90701 | -2.25830 |
| H | -1.80008 | -3.53679 | -1.55866 |
| C | 0.91523  | -1.55071 | -1.29092 |
| C | 2.08047  | -3.62679 | -2.77596 |
| C | 2.30564  | -1.62750 | -1.44639 |
| C | 0.12275  | -2.56544 | -1.84732 |
| C | 0.70814  | -3.59444 | -2.58067 |
| C | 2.87727  | -2.64817 | -2.20202 |
| H | 0.07837  | -4.37681 | -2.99979 |
| H | 3.95830  | -2.68211 | -2.32483 |
| H | 2.53005  | -4.42354 | -3.36077 |
| O | 1.11314  | -0.69822 | 1.32983  |
| C | 1.23251  | -0.20664 | 2.53884  |
| C | 1.67119  | 0.74498  | 5.17941  |
| C | 2.32851  | -0.64310 | 3.31856  |
| C | 0.35511  | 0.71342  | 3.14884  |
| C | 0.58015  | 1.17387  | 4.43959  |
| C | 2.53919  | -0.17712 | 4.60218  |
| H | 3.00084  | -1.37117 | 2.86986  |
| H | -0.52530 | 1.05900  | 2.61545  |
| H | -0.12236 | 1.88110  | 4.87408  |
| H | 3.39636  | -0.53949 | 5.16448  |
| H | 1.83872  | 1.11180  | 6.18661  |
| C | -0.75124 | 0.67024  | -1.97680 |
| H | -0.48275 | 0.00151  | -2.79783 |
| H | -0.26576 | 1.63754  | -2.11683 |
| C | -2.21044 | 0.84041  | -1.95493 |
| O | -2.97237 | 0.03189  | -2.47066 |
| C | -2.81347 | 2.02283  | -1.24019 |
| C | -4.06364 | 4.10976  | 0.13648  |

|    |          |          |          |
|----|----------|----------|----------|
| C  | -4.19946 | 2.04865  | -1.08861 |
| C  | -2.06692 | 3.07720  | -0.71354 |
| C  | -2.68515 | 4.11164  | -0.02808 |
| C  | -4.82111 | 3.07828  | -0.40261 |
| H  | -4.77155 | 1.23450  | -1.52317 |
| H  | -0.98778 | 3.09736  | -0.83218 |
| H  | -2.08893 | 4.92305  | 0.37835  |
| H  | -5.90074 | 3.07944  | -0.28735 |
| H  | -4.54751 | 4.91670  | 0.67832  |
| H  | -0.91719 | 0.85513  | 0.60779  |
| H  | -0.26720 | 1.34140  | 0.47248  |
| Co | 0.11212  | -0.08113 | -0.26311 |

### TSC3i

EE = -2302.628673

EE + ZPE = -2301.887337

G° = -2301.960180

Imaginary Freq = -972.11

|   |          |          |          |
|---|----------|----------|----------|
| P | -0.95189 | -1.78591 | -0.57620 |
| P | 1.99999  | 1.50783  | -0.18173 |
| C | -2.78060 | -1.89974 | -0.24498 |
| H | -3.17965 | -1.15938 | -0.95153 |
| C | -0.06973 | -3.29292 | 0.08101  |
| H | 0.96014  | -2.91989 | 0.15516  |
| C | -3.40344 | -3.24247 | -0.60627 |
| H | -3.07793 | -4.04176 | 0.06700  |
| H | -3.17240 | -3.54450 | -1.63281 |
| H | -4.49469 | -3.17402 | -0.52409 |
| C | -3.15657 | -1.45264 | 1.16192  |
| H | -2.79561 | -2.14819 | 1.92650  |
| H | -4.24794 | -1.39499 | 1.25289  |
| H | -2.75117 | -0.46134 | 1.39324  |
| C | -0.09118 | -4.49710 | -0.85061 |
| H | 0.47548  | -5.31334 | -0.38699 |
| H | 0.37792  | -4.28615 | -1.81601 |
| H | -1.10578 | -4.86984 | -1.03120 |
| C | -0.52085 | -3.68198 | 1.48510  |
| H | 0.19204  | -4.40074 | 1.90528  |
| H | -1.50355 | -4.16712 | 1.47779  |
| H | -0.55590 | -2.83291 | 2.17375  |
| C | 2.63075  | 2.04560  | 1.47840  |
| H | 2.80068  | 1.06714  | 1.95215  |
| C | 1.58933  | 2.77736  | 2.31463  |
| H | 1.91269  | 2.80614  | 3.36115  |
| H | 0.62003  | 2.26914  | 2.28592  |
| H | 1.45202  | 3.81218  | 1.98351  |
| C | 3.95454  | 2.79656  | 1.44281  |
| H | 4.32818  | 2.93278  | 2.46434  |
| H | 3.84436  | 3.79526  | 1.00487  |
| H | 4.72612  | 2.26029  | 0.88113  |
| C | 1.95249  | 2.94732  | -1.37264 |
| H | 1.31084  | 2.55844  | -2.17590 |
| C | 1.27206  | 4.16928  | -0.76674 |
| H | 1.93981  | 4.69065  | -0.07213 |
| H | 0.35624  | 3.92400  | -0.21686 |
| H | 1.00585  | 4.88174  | -1.55571 |
| C | 3.28327  | 3.32693  | -2.00943 |
| H | 4.03291  | 3.62070  | -1.26705 |
| H | 3.13402  | 4.18232  | -2.67938 |
| H | 3.69543  | 2.51250  | -2.61181 |
| C | 3.30492  | 0.39942  | -0.84931 |
| H | 3.59053  | -0.25003 | -0.01167 |

|    |          |          |          |
|----|----------|----------|----------|
| H  | 4.19776  | 0.92890  | -1.19676 |
| C  | -0.79923 | -1.89328 | -2.41092 |
| H  | -1.50635 | -1.16380 | -2.82962 |
| H  | -1.06330 | -2.87716 | -2.81385 |
| C  | 1.26233  | -0.67937 | -1.74677 |
| C  | 2.67234  | -1.70219 | -3.94956 |
| C  | 2.62722  | -0.40610 | -1.91893 |
| C  | 0.63201  | -1.51874 | -2.67717 |
| C  | 1.33611  | -2.02598 | -3.76767 |
| C  | 3.31961  | -0.89819 | -3.02164 |
| H  | 0.83289  | -2.67991 | -4.47771 |
| H  | 4.37596  | -0.66553 | -3.14522 |
| H  | 3.21482  | -2.08987 | -4.80683 |
| O  | 1.41302  | -0.86538 | 0.99334  |
| C  | 1.34226  | -1.03749 | 2.29682  |
| C  | 1.36415  | -1.60602 | 5.06874  |
| C  | 2.38627  | -1.77850 | 2.89073  |
| C  | 0.32190  | -0.57503 | 3.14402  |
| C  | 0.34074  | -0.86080 | 4.50278  |
| C  | 2.38949  | -2.05861 | 4.24378  |
| H  | 3.17759  | -2.14074 | 2.23800  |
| H  | -0.49823 | -0.00692 | 2.71503  |
| H  | -0.47032 | -0.49494 | 5.12783  |
| H  | 3.20513  | -2.64215 | 4.66343  |
| H  | 1.36715  | -1.82854 | 6.13071  |
| C  | -1.05260 | 1.43546  | -1.42692 |
| H  | -0.54638 | 1.04012  | -2.30514 |
| H  | -0.80530 | 2.49471  | -1.30893 |
| C  | -2.52569 | 1.25399  | -1.58693 |
| O  | -2.98505 | 0.58656  | -2.49467 |
| C  | -3.43800 | 1.86236  | -0.57093 |
| C  | -5.22806 | 2.84919  | 1.32351  |
| C  | -4.80020 | 1.57448  | -0.66497 |
| C  | -2.98673 | 2.66397  | 0.47868  |
| C  | -3.87797 | 3.15396  | 1.42100  |
| C  | -5.68947 | 2.06092  | 0.27613  |
| H  | -5.13404 | 0.95424  | -1.49108 |
| H  | -1.93256 | 2.90688  | 0.57874  |
| H  | -3.51676 | 3.77312  | 2.23582  |
| H  | -6.74636 | 1.82638  | 0.19726  |
| H  | -5.92396 | 3.22883  | 2.06537  |
| H  | -0.90981 | 1.12035  | -0.10919 |
| H  | -0.59439 | 0.73851  | 0.93511  |
| Co | 0.25525  | 0.08786  | -0.19930 |

### TSC3ii

EE = -2302.630366

EE + ZPE = -2301.889215

G° = -2301.962125

Imaginary Freq = -1158.31

|   |          |          |          |
|---|----------|----------|----------|
| P | -1.60421 | -1.64355 | 0.26243  |
| P | 1.86387  | 0.90632  | -0.96841 |
| C | -3.33718 | -1.30423 | 0.84256  |
| H | -3.76287 | -0.78407 | -0.02504 |
| C | -0.82106 | -2.95723 | 1.34783  |
| H | 0.24603  | -2.80157 | 1.14863  |
| C | -4.18002 | -2.55075 | 1.08022  |
| H | -3.84133 | -3.12076 | 1.95144  |
| H | -4.18568 | -3.21984 | 0.21369  |
| H | -5.21897 | -2.25635 | 1.27056  |
| C | -3.37685 | -0.34967 | 2.03032  |
| H | -3.00465 | -0.81751 | 2.94715  |

|   |          |          |          |
|---|----------|----------|----------|
| H | -4.41105 | -0.03600 | 2.21601  |
| H | -2.78790 | 0.55561  | 1.84497  |
| C | -1.17582 | -4.38758 | 0.96197  |
| H | -0.65475 | -5.07676 | 1.63749  |
| H | -0.86411 | -4.63581 | -0.05640 |
| H | -2.24770 | -4.59231 | 1.05622  |
| C | -1.04376 | -2.72877 | 2.83830  |
| H | -0.37162 | -3.38549 | 3.40352  |
| H | -2.06618 | -2.97970 | 3.14216  |
| H | -0.82327 | -1.70189 | 3.13442  |
| C | 2.87861  | 2.00555  | 0.13623  |
| H | 3.02211  | 1.34263  | 1.00182  |
| C | 2.11585  | 3.22665  | 0.63201  |
| H | 2.65418  | 3.68016  | 1.47279  |
| H | 1.11296  | 2.96159  | 0.98501  |
| H | 2.01378  | 3.99184  | -0.14481 |
| C | 4.25919  | 2.37437  | -0.38827 |
| H | 4.83114  | 2.86387  | 0.40915  |
| H | 4.20819  | 3.07620  | -1.22800 |
| H | 4.83272  | 1.49843  | -0.70760 |
| C | 1.84202  | 1.60135  | -2.70550 |
| H | 1.00213  | 1.06498  | -3.16477 |
| C | 1.52489  | 3.09248  | -2.73159 |
| H | 2.38334  | 3.68847  | -2.40306 |
| H | 0.67012  | 3.36598  | -2.10400 |
| H | 1.28916  | 3.40210  | -3.75575 |
| C | 3.07963  | 1.30214  | -3.54160 |
| H | 3.99165  | 1.72546  | -3.10792 |
| H | 2.95520  | 1.74697  | -4.53612 |
| H | 3.23019  | 0.22865  | -3.68553 |
| C | 2.86804  | -0.62684 | -1.11559 |
| H | 3.17326  | -0.88967 | -0.09344 |
| H | 3.78147  | -0.50160 | -1.70617 |
| C | -1.74441 | -2.44112 | -1.38807 |
| H | -2.35503 | -1.76758 | -2.00387 |
| H | -2.23319 | -3.42092 | -1.36901 |
| C | 0.56632  | -1.52844 | -1.36050 |
| C | 1.48985  | -3.62136 | -2.99804 |
| C | 1.92655  | -1.64707 | -1.68683 |
| C | -0.31549 | -2.51038 | -1.84617 |
| C | 0.14769  | -3.54494 | -2.65389 |
| C | 2.37908  | -2.67709 | -2.50824 |
| H | -0.55018 | -4.29857 | -3.01429 |
| H | 3.43696  | -2.74279 | -2.75687 |
| H | 1.84376  | -4.42425 | -3.63790 |
| O | 0.63570  | -0.40740 | 1.83469  |
| C | 1.76939  | -0.18919 | 2.49835  |
| C | 4.17866  | 0.23792  | 3.86837  |
| C | 2.79886  | -1.13607 | 2.44511  |
| C | 1.95235  | 0.95700  | 3.28123  |
| C | 3.14819  | 1.16589  | 3.95103  |
| C | 3.98876  | -0.91924 | 3.12141  |
| H | 2.63689  | -2.03827 | 1.85818  |
| H | 1.14356  | 1.68118  | 3.34599  |
| H | 3.27477  | 2.06456  | 4.54877  |
| H | 4.77821  | -1.66369 | 3.06618  |
| H | 5.11293  | 0.40531  | 4.39412  |
| C | -1.11720 | 0.79941  | -1.71531 |
| H | -0.99101 | 0.17152  | -2.60137 |
| H | -0.63699 | 1.76632  | -1.86976 |
| C | -2.55929 | 0.99436  | -1.47487 |
| O | -3.39701 | 0.23534  | -1.94404 |

|    |          |          |          |
|----|----------|----------|----------|
| C  | -3.02745 | 2.14423  | -0.62929 |
| C  | -4.01950 | 4.19883  | 0.97971  |
| C  | -4.38631 | 2.21764  | -0.32583 |
| C  | -2.17589 | 3.13061  | -0.13229 |
| C  | -2.66757 | 4.15051  | 0.66706  |
| C  | -4.88024 | 3.23201  | 0.47681  |
| H  | -5.04093 | 1.45422  | -0.73522 |
| H  | -1.11443 | 3.09638  | -0.35458 |
| H  | -1.99256 | 4.90971  | 1.05059  |
| H  | -5.93967 | 3.27230  | 0.71109  |
| H  | -4.40299 | 4.99439  | 1.61155  |
| H  | -0.56640 | 1.14823  | 0.80425  |
| H  | -0.03744 | 0.57020  | 1.43404  |
| Co | -0.06828 | -0.05195 | -0.21754 |

# C6ii

EE = -1995.293734

EE + ZPE = -1994.655612

G° = -1994.721824

|   |          |          |          |
|---|----------|----------|----------|
| P | 1.03245  | 1.56911  | 0.42116  |
| P | -2.24265 | -1.20069 | 0.05419  |
| C | 2.88386  | 1.62301  | 0.55175  |
| H | 3.15802  | 1.32034  | -0.47127 |
| C | 0.23018  | 2.31701  | 1.94514  |
| H | -0.80852 | 1.95584  | 1.85983  |
| C | 3.46056  | 3.00855  | 0.80939  |
| H | 3.22830  | 3.35892  | 1.82168  |
| H | 3.09864  | 3.75659  | 0.09723  |
| H | 4.55324  | 2.97524  | 0.72403  |
| C | 3.45986  | 0.59319  | 1.51564  |
| H | 3.36035  | 0.91482  | 2.55729  |
| H | 4.52925  | 0.45885  | 1.31467  |
| H | 2.97750  | -0.38339 | 1.41215  |
| C | 0.16919  | 3.83769  | 1.97066  |
| H | -0.33792 | 4.16933  | 2.88498  |
| H | -0.39031 | 4.24085  | 1.12158  |
| H | 1.16832  | 4.28693  | 1.96830  |
| C | 0.81058  | 1.75644  | 3.23663  |
| H | 0.15730  | 2.01007  | 4.07995  |
| H | 1.79467  | 2.18845  | 3.45001  |
| H | 0.91664  | 0.66700  | 3.20595  |
| C | -3.20806 | -0.65581 | 1.55499  |
| H | -3.34764 | 0.41253  | 1.32172  |
| C | -2.38026 | -0.75955 | 2.83000  |
| H | -2.91422 | -0.29186 | 3.66571  |
| H | -1.40279 | -0.27752 | 2.72726  |
| H | -2.19131 | -1.80427 | 3.10127  |
| C | -4.57970 | -1.28679 | 1.74082  |
| H | -5.12754 | -0.75382 | 2.52699  |
| H | -4.49653 | -2.33158 | 2.06040  |
| H | -5.19227 | -1.25386 | 0.83448  |
| C | -2.35490 | -3.03365 | -0.20644 |
| H | -1.68795 | -3.16172 | -1.07385 |
| C | -1.75053 | -3.78985 | 0.96791  |
| H | -2.41222 | -3.75444 | 1.84192  |
| H | -0.78167 | -3.37085 | 1.26091  |
| H | -1.60985 | -4.84569 | 0.71111  |
| C | -3.72101 | -3.58244 | -0.59539 |
| H | -4.42586 | -3.55323 | 0.24008  |
| H | -3.62173 | -4.63140 | -0.89876 |
| H | -4.16805 | -3.04094 | -1.43467 |
| C | 0.62739  | 2.74150  | -0.93558 |

|    |          |          |          |
|----|----------|----------|----------|
| H  | 1.26594  | 2.42705  | -1.77405 |
| H  | 0.85058  | 3.79096  | -0.71160 |
| C  | -1.35551 | 1.22780  | -0.99455 |
| C  | -2.86428 | 3.20037  | -2.33837 |
| C  | -2.65156 | 0.96038  | -1.48124 |
| C  | -0.81223 | 2.49621  | -1.28757 |
| C  | -1.56554 | 3.47310  | -1.93209 |
| C  | -3.40082 | 1.93866  | -2.12867 |
| H  | -1.12968 | 4.45070  | -2.13121 |
| H  | -4.40707 | 1.71253  | -2.47737 |
| H  | -3.45182 | 3.96656  | -2.83614 |
| C  | 0.33186  | -1.15995 | -1.45487 |
| H  | -0.27474 | -0.84382 | -2.30922 |
| H  | 0.21912  | -2.22690 | -1.24881 |
| C  | 1.73178  | -0.76178 | -1.67832 |
| O  | 2.02428  | 0.22427  | -2.34199 |
| C  | 2.83636  | -1.58980 | -1.08588 |
| C  | 4.98055  | -3.03882 | -0.04340 |
| C  | 4.14256  | -1.31364 | -1.48769 |
| C  | 2.61710  | -2.60966 | -0.16039 |
| C  | 3.68362  | -3.32544 | 0.36130  |
| C  | 5.20854  | -2.03300 | -0.97374 |
| H  | 4.29440  | -0.52098 | -2.21423 |
| H  | 1.60951  | -2.81182 | 0.18811  |
| H  | 3.50322  | -4.10831 | 1.09178  |
| H  | 6.22080  | -1.81171 | -1.29873 |
| H  | 5.81442  | -3.60200 | 0.36528  |
| H  | 0.34524  | -1.09814 | 1.02854  |
| Co | -0.36017 | -0.11766 | 0.08199  |
| C  | -3.18899 | -0.43831 | -1.32947 |
| H  | -4.27655 | -0.47150 | -1.18332 |
| H  | -2.96970 | -1.02990 | -2.23148 |

#### TSC4ii

EE = -1995.288371

EE + ZPE = -1994.650822

G° = -1994.716867

Imaginary Freq = -540.47

|   |          |          |          |
|---|----------|----------|----------|
| P | 0.46370  | 1.97260  | -0.00368 |
| P | -1.90498 | -1.59278 | -0.17165 |
| C | 2.08719  | 2.71793  | -0.55635 |
| H | 2.16182  | 2.34033  | -1.58527 |
| C | 0.31868  | 2.10679  | 1.86122  |
| H | -0.70677 | 1.73030  | 2.00078  |
| C | 2.12600  | 4.24103  | -0.59858 |
| H | 2.00136  | 4.68603  | 0.39456  |
| H | 1.36543  | 4.66792  | -1.25728 |
| H | 3.10263  | 4.56555  | -0.97837 |
| C | 3.29055  | 2.18522  | 0.21091  |
| H | 3.39970  | 2.69530  | 1.17531  |
| H | 4.20615  | 2.37019  | -0.36271 |
| H | 3.24265  | 1.10956  | 0.40318  |
| C | 0.39642  | 3.50738  | 2.45120  |
| H | 0.17571  | 3.46627  | 3.52503  |
| H | -0.32045 | 4.20013  | 2.00093  |
| H | 1.40034  | 3.93420  | 2.34755  |
| C | 1.26619  | 1.17110  | 2.60552  |
| H | 0.90399  | 1.00712  | 3.62760  |
| H | 2.27075  | 1.59788  | 2.68228  |
| H | 1.35879  | 0.19467  | 2.11998  |
| C | -2.29313 | -1.72004 | 1.65323  |
| H | -2.69595 | -0.70993 | 1.82985  |

|    |          |          |          |
|----|----------|----------|----------|
| C  | -1.04620 | -1.87327 | 2.51166  |
| H  | -1.30224 | -1.76510 | 3.57246  |
| H  | -0.29991 | -1.11570 | 2.25932  |
| H  | -0.58457 | -2.85967 | 2.38867  |
| C  | -3.35500 | -2.73553 | 2.05038  |
| H  | -3.63271 | -2.58528 | 3.10055  |
| H  | -2.98391 | -3.76294 | 1.96338  |
| H  | -4.27140 | -2.65268 | 1.45836  |
| C  | -1.73680 | -3.30861 | -0.89463 |
| H  | -1.30826 | -3.08794 | -1.88545 |
| C  | -0.73374 | -4.16478 | -0.13153 |
| H  | -1.14532 | -4.49706 | 0.82808  |
| H  | 0.20502  | -3.63996 | 0.07273  |
| H  | -0.49027 | -5.06516 | -0.70704 |
| C  | -3.03713 | -4.07162 | -1.11367 |
| H  | -3.52253 | -4.33173 | -0.16821 |
| H  | -2.82837 | -5.01065 | -1.64075 |
| H  | -3.75564 | -3.51164 | -1.71837 |
| C  | -0.77703 | 3.19888  | -0.59159 |
| H  | -0.53604 | 3.38477  | -1.64818 |
| H  | -0.73420 | 4.16711  | -0.07978 |
| C  | -2.14489 | 1.11994  | -0.52540 |
| C  | -4.51715 | 2.67155  | -0.45502 |
| C  | -3.42425 | 0.53165  | -0.61902 |
| C  | -2.11210 | 2.52935  | -0.49264 |
| C  | -3.27621 | 3.28960  | -0.43732 |
| C  | -4.58907 | 1.29216  | -0.56798 |
| H  | -3.21016 | 4.37512  | -0.39361 |
| H  | -5.55844 | 0.80046  | -0.62452 |
| H  | -5.42552 | 3.26494  | -0.40311 |
| C  | 0.91313  | -1.08369 | -1.46846 |
| H  | 0.35572  | -0.80321 | -2.37930 |
| H  | 0.87348  | -2.16651 | -1.31702 |
| C  | 2.30917  | -0.61211 | -1.60885 |
| O  | 2.62030  | 0.25931  | -2.40135 |
| C  | 3.36803  | -1.22847 | -0.74027 |
| C  | 5.42440  | -2.25912 | 0.83769  |
| C  | 4.70177  | -0.97260 | -1.05692 |
| C  | 3.07849  | -2.00959 | 0.37826  |
| C  | 4.10142  | -2.51590 | 1.16721  |
| C  | 5.72346  | -1.48827 | -0.27937 |
| H  | 4.90670  | -0.35261 | -1.92445 |
| H  | 2.04637  | -2.20537 | 0.65711  |
| H  | 3.86462  | -3.11226 | 2.04296  |
| H  | 6.75833  | -1.28777 | -0.53953 |
| H  | 6.22464  | -2.65897 | 1.45321  |
| H  | 0.60801  | -0.69569 | 0.11661  |
| Co | -0.47859 | 0.02761  | -0.55089 |
| C  | -3.49992 | -0.95282 | -0.82619 |
| H  | -4.38837 | -1.41057 | -0.37312 |
| H  | -3.52628 | -1.18371 | -1.90053 |
